# Supplementary material for: A proteomic approach reveals integrin activation state-dependent control of microtubule cortical targeting
Source: PubMed Central journal article supplement (PMC4317495; doi:10.1038/ncomms7135), 2015-01-22
Supplement: ncomms7135-s1.pdf [file ncomms7135-s1.pdf]

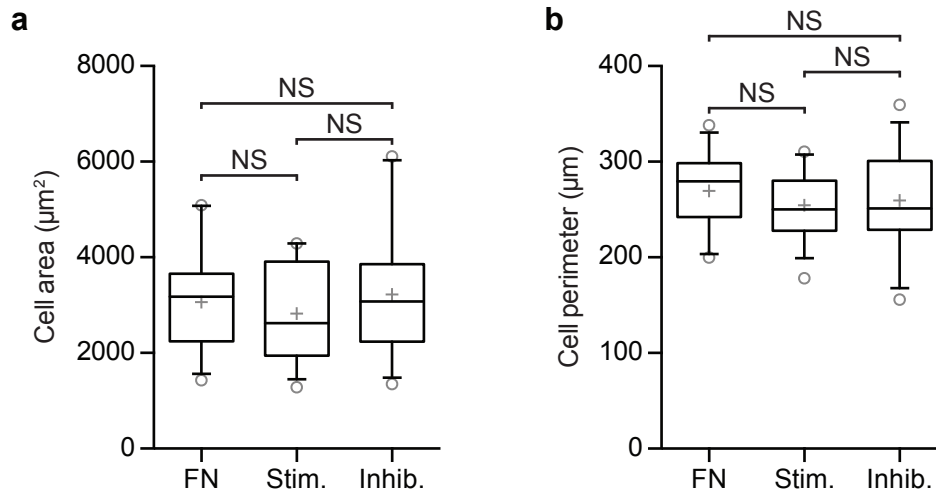

**Supplementary Figure 1 | Morphology of cells spread on activity-specific anti-integrin mAbs.**

(a,b) HFFs were spread on FN or stimulatory or inhibitory anti- $\beta 1$  integrin mAbs for 1 h. Cell areas (a) and perimeters (b) were measured using ImageJ. Box-and-whisker plots shows the median (line), mean (plus sign), 25th and 75th percentiles (box) and 5th and 95th percentiles (whiskers) ( $n = 31$ , 31 and 33 cells for FN, stimulatory and inhibitory, respectively). Comparisons between the three independent groups were determined by Kruskal–Wallis test with Dunn’s multiple comparisons test.

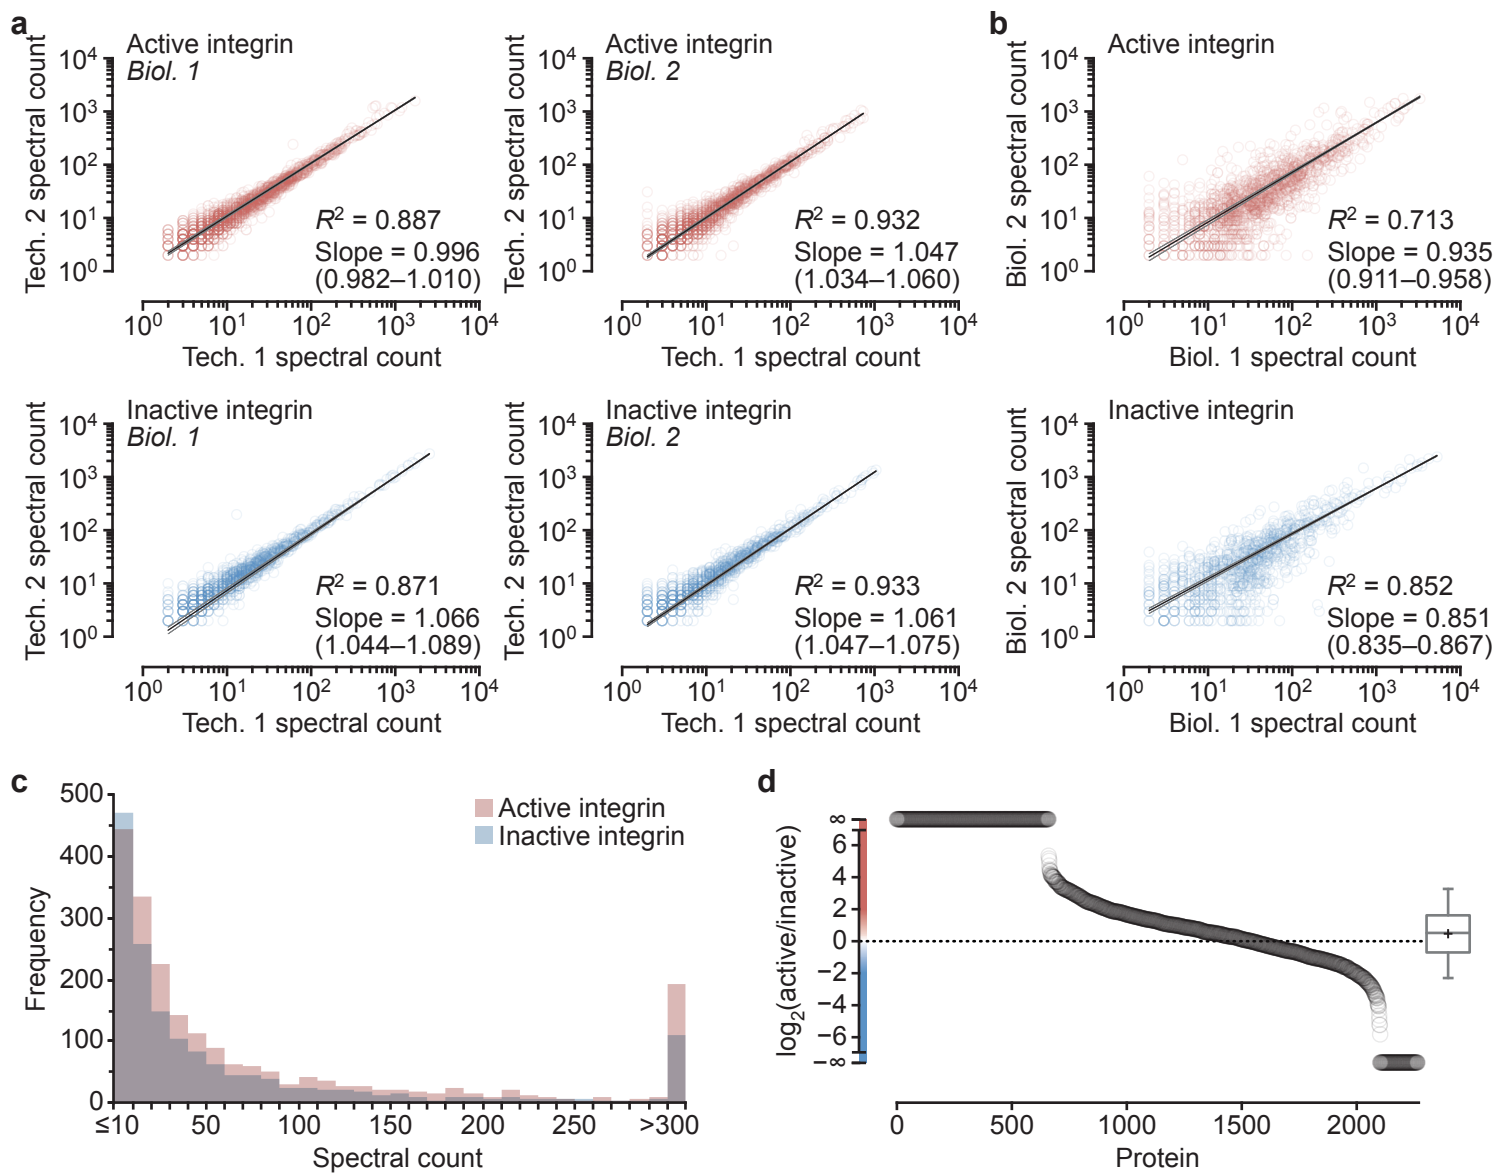

**Supplementary Figure 2 | Quantification and reproducibility of MS data.** (a,b) Spectral counts of proteins identified in active (red circles) and inactive (blue circles) integrin complexes were compared between technical replicate (a) and biological replicate (b) analyses. Proteins detected in both compared samples are displayed. Log–log lines (black lines) and associated 95% confidence bands (thin grey lines) were calculated by nonlinear regression analysis (least squares fit). Goodness of fit ( $R^2$ ) and slope best fit values (95% confidence interval in parentheses) are displayed. Hougaard's measure of skewness was  $< 0.10$  (almost linear) for all slope best fits. (c) Frequency distribution of spectral counts of proteins identified in active (red) and inactive (blue) integrin data sets. Bins, 10 spectral counts. (d) Abundance ratios of proteins identified in active relative to inactive integrin complexes were determined from normalised spectral counts and  $\log_2$  transformed. Colour bar indicates higher relative abundance in the active (red) or inactive (blue) integrin data sets. Non-infinite abundance ratios were normally distributed (non-Gaussian distribution  $P > 0.05$ ; D'Agostino & Pearson omnibus normality test), with median abundance ratio 0.52 (0.40–0.60, 95% confidence interval). Box-and-whisker plot shows the median (line), mean (plus sign), 25th and 75th percentiles (box) and 5th and 95th percentiles (whiskers).

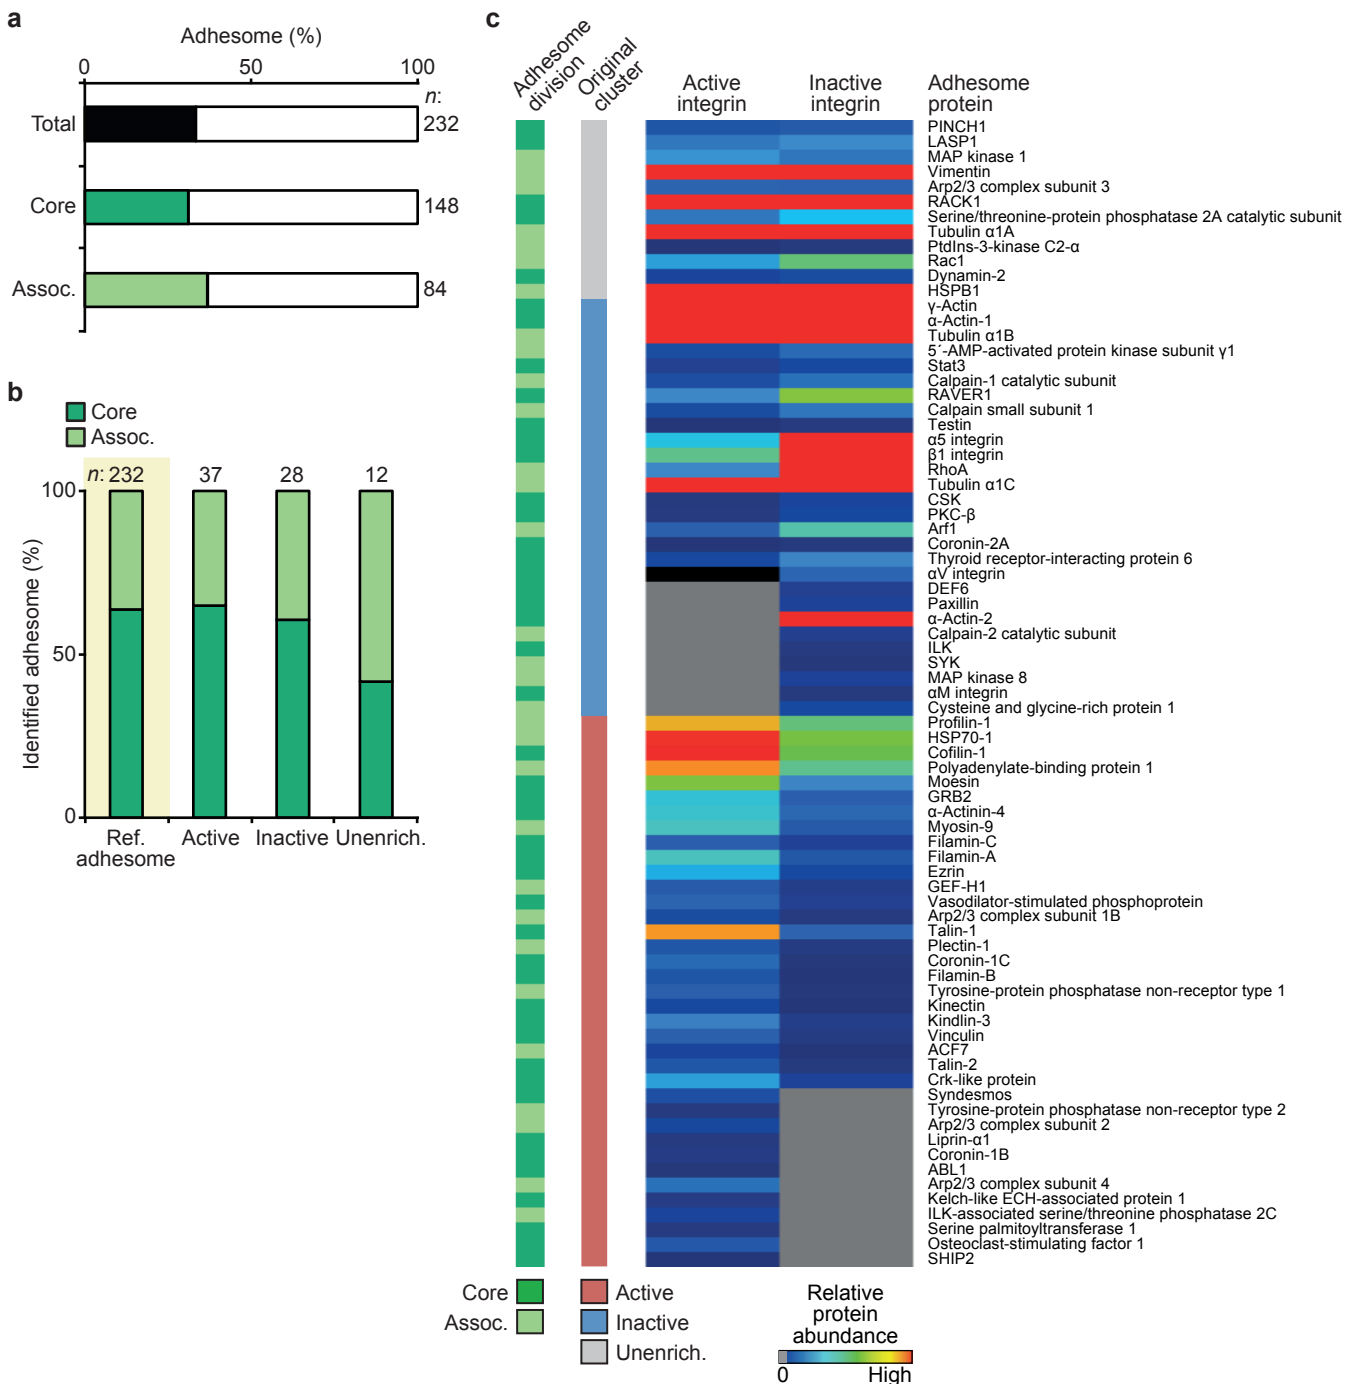

### Supplementary Figure 3 | Adhesome components identified in activation state-dependent integrin complexes.

(a) Proportions of the literature-curated adhesome<sup>1</sup> identified by MS. Of the total reported adhesome ( $n = 232$  proteins), 77 proteins (33%) were identified by MS. Adhesome divisions of reported intrinsic (core) components (46 proteins; 31%) and transiently or peripherally associated components (31 proteins; 37%) were represented to a similar extent in the MS data. (b) Proportions of identified adhesome proteins reported as core or associated adhesome components. Of the identified adhesome proteins enriched in active integrin complexes ( $n = 37$  proteins), 24 proteins (65%) were core adhesome components; of those enriched in inactive integrin complexes ( $n = 28$  proteins), a similar proportion (17 proteins; 61%) were core adhesome components. These proportions are similar to the 64% of the total adhesome reported as core components (yellow box, reference adhesome). In contrast, identified adhesome proteins with similar abundance in both data sets (unenriched) were fewer ( $n = 12$  proteins) and had a smaller proportion of core adhesome components (5 proteins; 42%). This may reflect a relatively transient or peripherally associated set of proteins recruited to integrin complexes in an activation state-independent manner. (c) Heat map shows relative protein abundance (normalised spectral count) for identified adhesome components (grey, not detected). Clusters of differentially enriched proteins are indicated, and protein order is preserved from the original hierarchical clustering analysis (see Fig. 1d and Supplementary Table 1 for full, hierarchically clustered MS data). Heat bar (left) indicates the distribution of core and associated adhesome components.

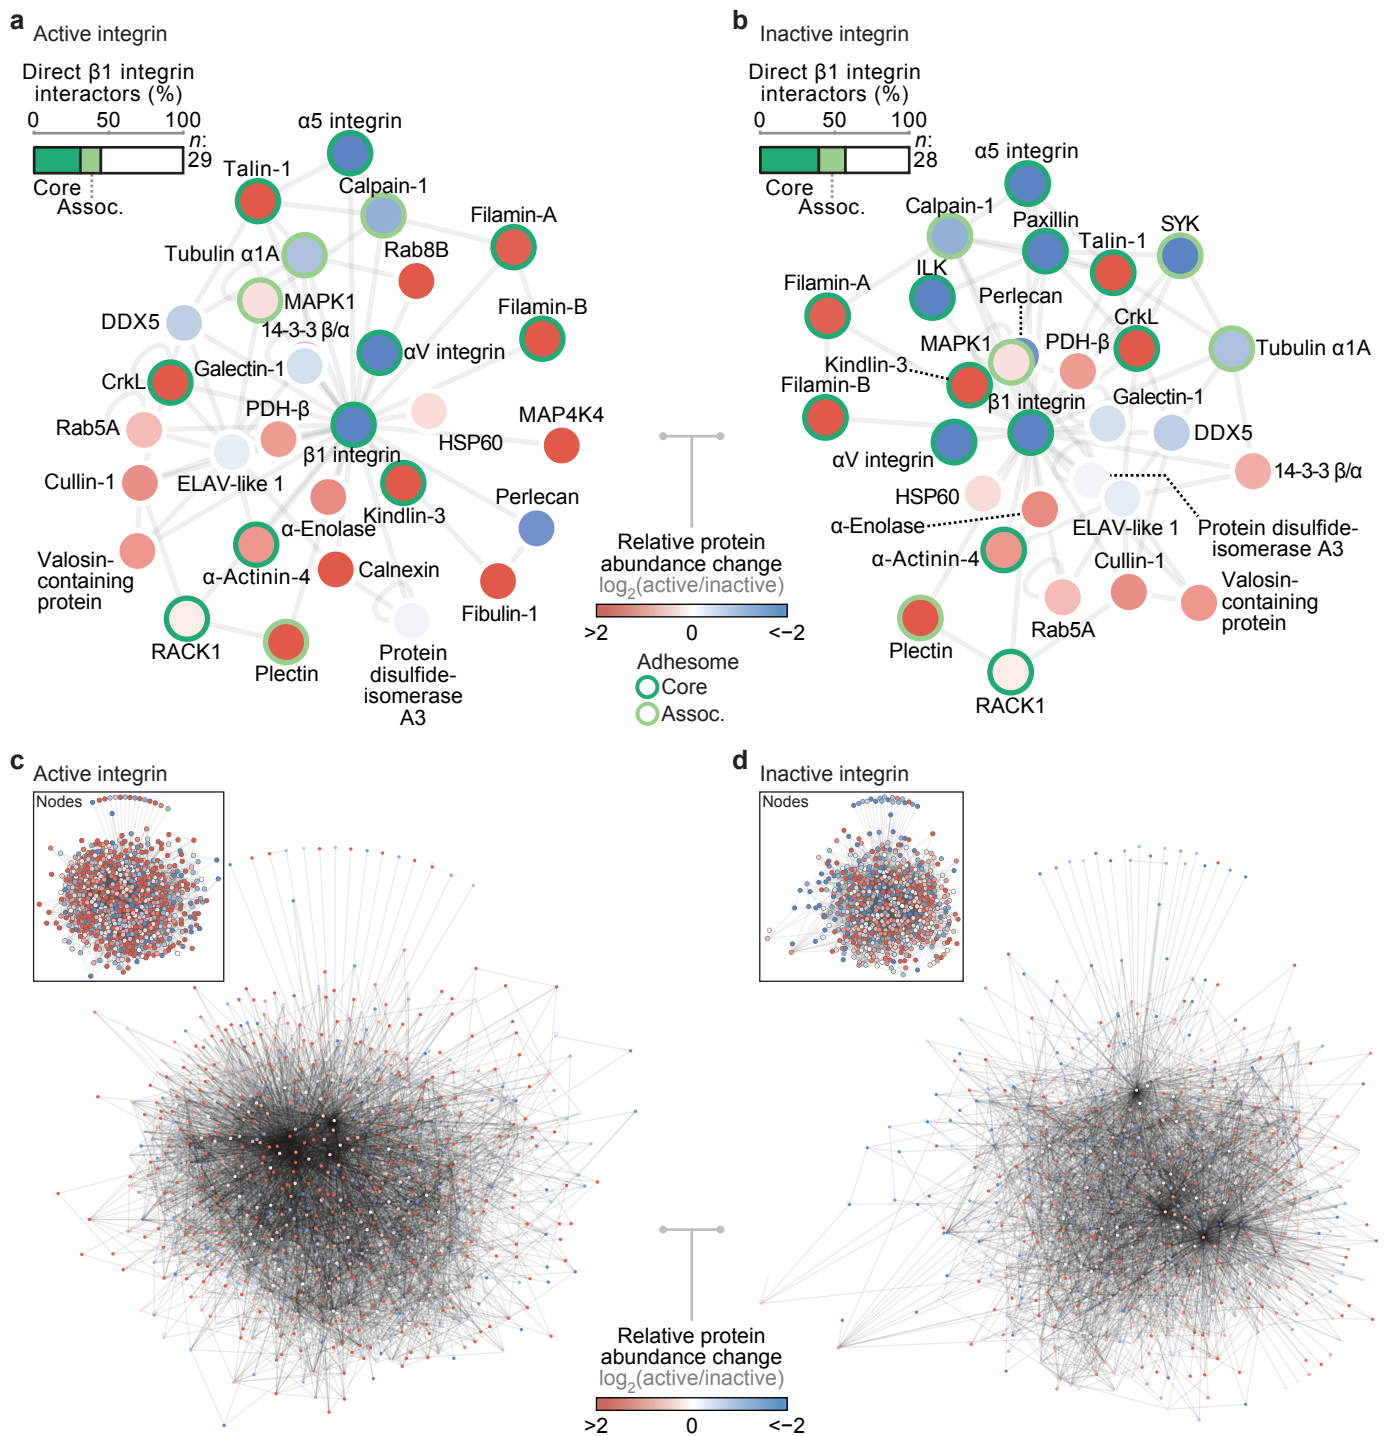

### Supplementary Figure 4 | Interaction network analysis of activation state-dependent integrin complexes.

(a–d) Quantitative MS data for all proteins identified in the integrin data sets were mapped onto a merged, multi-source interactome database to generate active and inactive integrin interactomes (see methods for details). Of the identified proteins reported to interact directly with  $\beta 1$  integrin (the one-hop interactions networks) ( $n = 29$  and  $28$  for active and inactive integrin, respectively), 13 proteins (45%) in the active integrin network (a) and 16 proteins (57%) in the inactive integrin network (b) were reported adhesome components. Of these adhesome components, 69% were intrinsic (core) adhesome components in the active (9 proteins) and inactive (11 proteins) integrin networks. Analysis of the  $\beta 1$  integrin two-hop interaction networks (proteins reported to interact directly with  $\beta 1$  integrin or with  $\beta 1$  integrin-binding partners) identified 751 proteins in the active integrin network (c, inset) and 636 proteins in the inactive integrin network (d, inset), which represents 9% and 7% of the total reported  $\beta 1$  integrin two-hop interactome, respectively. These networks were highly interconnected, with 5152 and 3556 protein interactions in the active (c) and inactive (d) integrin networks, respectively. Nodes (circles) represent proteins identified by MS and are coloured according to protein enrichment in active (red) or inactive (blue) integrin complexes ( $\log_2$  transformed). Edges (grey lines) represent reported protein-protein interactions. Networks were clustered using the yFiles Organic algorithm implemented in Cytoscape.



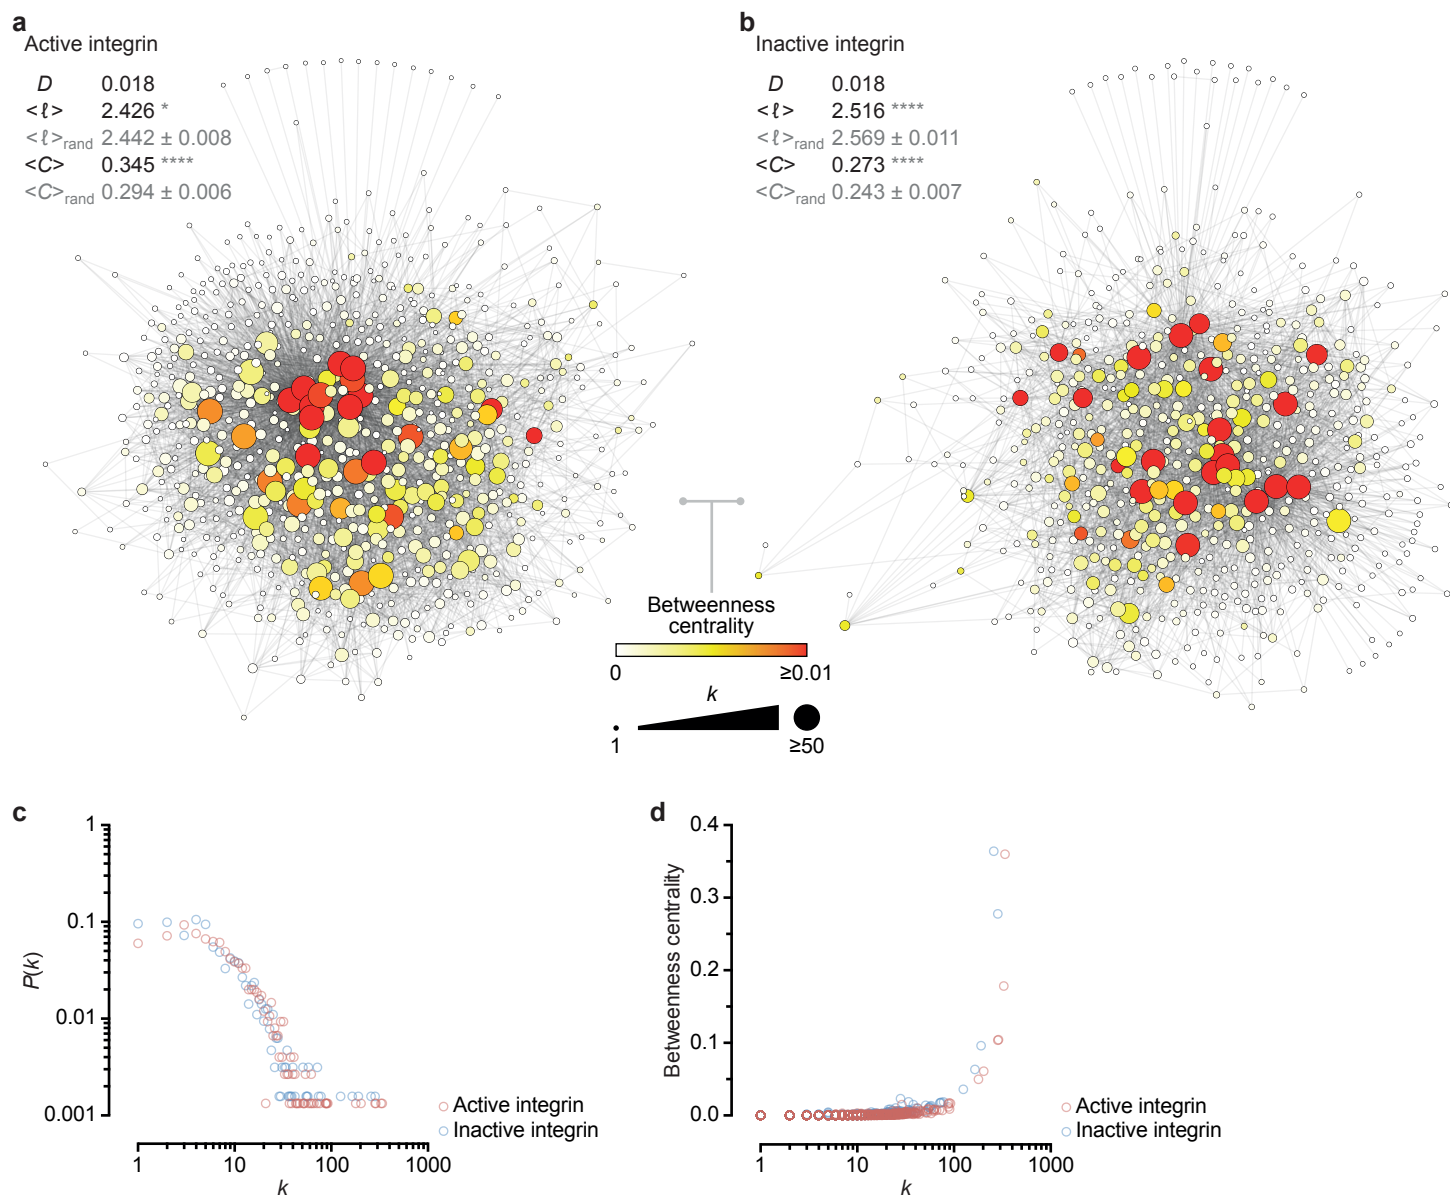

**Supplementary Figure 5 | Topological analysis of integrin adhesion complex networks.** (a,b)  $\beta 1$  integrin two-hop interaction networks constructed from the active (a) and inactive (b) integrin data sets were clustered using the yFiles Organic algorithm implemented in Cytoscape. Self-interactions were removed and topological parameters were computed using NetworkAnalyzer:  $D$ , network density;  $\langle \ell \rangle$ , average shortest path length;  $\langle C \rangle$ , average clustering coefficient. Shortest path length represents the ability of two nodes (proteins; circles) in a network to interact via the smallest number of edges (protein-protein interactions; grey lines). For both integrin networks, this value was smaller than those expected by random network simulations ( $\langle \ell \rangle_{\text{rand}}$ , grey font), indicating highly interconnected (navigable) networks. Nodes are sized according to degree (number of interactions;  $k$ ) and coloured according to betweenness centrality. Betweenness centrality represents the potential of a node to be part of the shortest path length between different pairs of nodes in the network and is a measure of the load on or the flow of network traffic through the node. High betweenness centrality equates to a network bottleneck (high-traffic node). The clustering coefficient represents the capacity for groups of nodes to interact. A high clustering coefficient equates to highly interconnected clusters in the network. Clustering coefficients of both networks were larger than those of random simulations ( $\langle C \rangle_{\text{rand}}$ , grey font), indicating that the proteins identified by MS have a tendency to form groups within the networks, in line with the proposed modular nature of the adhesome<sup>2,3</sup>. Random networks were generated from  $10^5$  degree-preserving edge shuffles of each network. Results are mean  $\pm$  s.d. ( $n = 10^4$  rounds of randomisation). \* $P < 0.05$ , \*\*\*\* $P < 0.0001$ ; two-tailed one-sample Z test. (c,d) Plots show the relationship between degree and the degree distribution,  $P(k)$  (c), or betweenness centrality (d) for the active and inactive integrin networks. Highly connected proteins correlated with increased betweenness centrality, suggesting that hubs may influence the adhesion networks through both direct and indirect interactions.

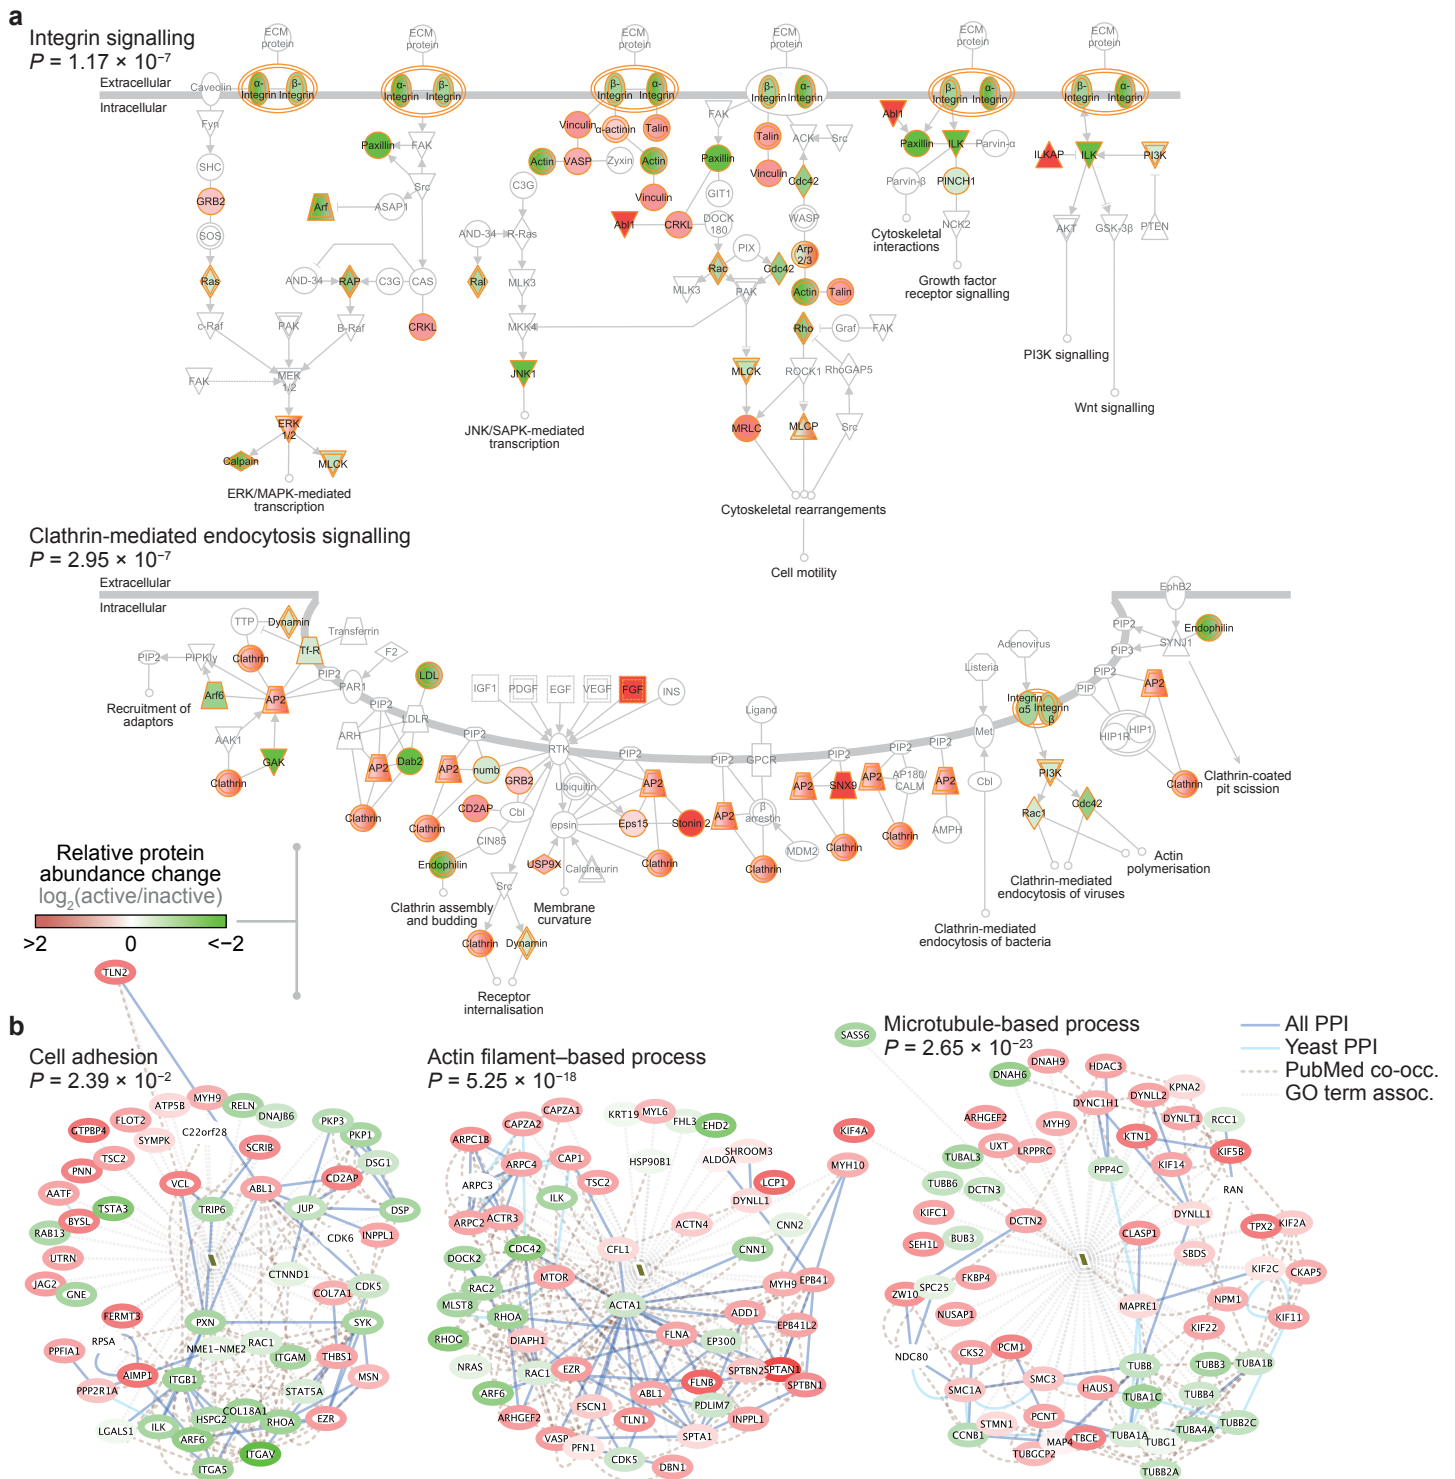

**Supplementary Figure 6 | Pathway and functional interaction network analyses of activation state-dependent integrin complexes.**

(a) Overrepresented canonical pathways that contain a number of adhesome proteins were selected ( $P < 0.0001$ ; Fisher's exact test). Coloured nodes (shapes) represent proteins identified by MS and are coloured according to protein enrichment in active (red) or inactive (green) integrin complexes ( $\log_2$  transformed). Nodes with multiple colours comprise quantitative contributions from multiple identified subunits or members of a complex or group. Grey nodes represent pathway members not identified in the integrin data sets. Edges (grey lines) represent direct functional interactions (no arrowhead, binding only; pointed arrowhead, acts on, including binding; blunt arrowhead, inhibits, including binding; blunt arrowhead with pointed arrowhead, inhibits and acts on, including binding; circular arrowhead, leads to). (b) Functional interaction networks for overrepresented adhesion and cytoskeleton Gene Ontology terms were selected ( $P < 0.05$ ; Fisher's exact test). Nodes (ovals) represent proteins identified by MS, and node borders are coloured according to protein enrichment in active (red) or inactive (green) integrin complexes ( $\log_2$  transformed). Edges (lines) represent reported protein-protein interactions (blue solid lines), literature co-occurrence (brown dashed lines) or Gene Ontology term association (grey dotted lines). A number of the adhesion-related enzymes in the integrin signalling pathway (a) and the cell adhesion and actin filament networks (b) (e.g. RhoA, Rac1, Cdc42 and Arf6) were enriched in inactive integrin complexes. Furthermore, excluding tubulin, most (41 proteins; 80%) of the proteins in the overrepresented microtubule-based process network (b) were enriched in active integrin complexes.

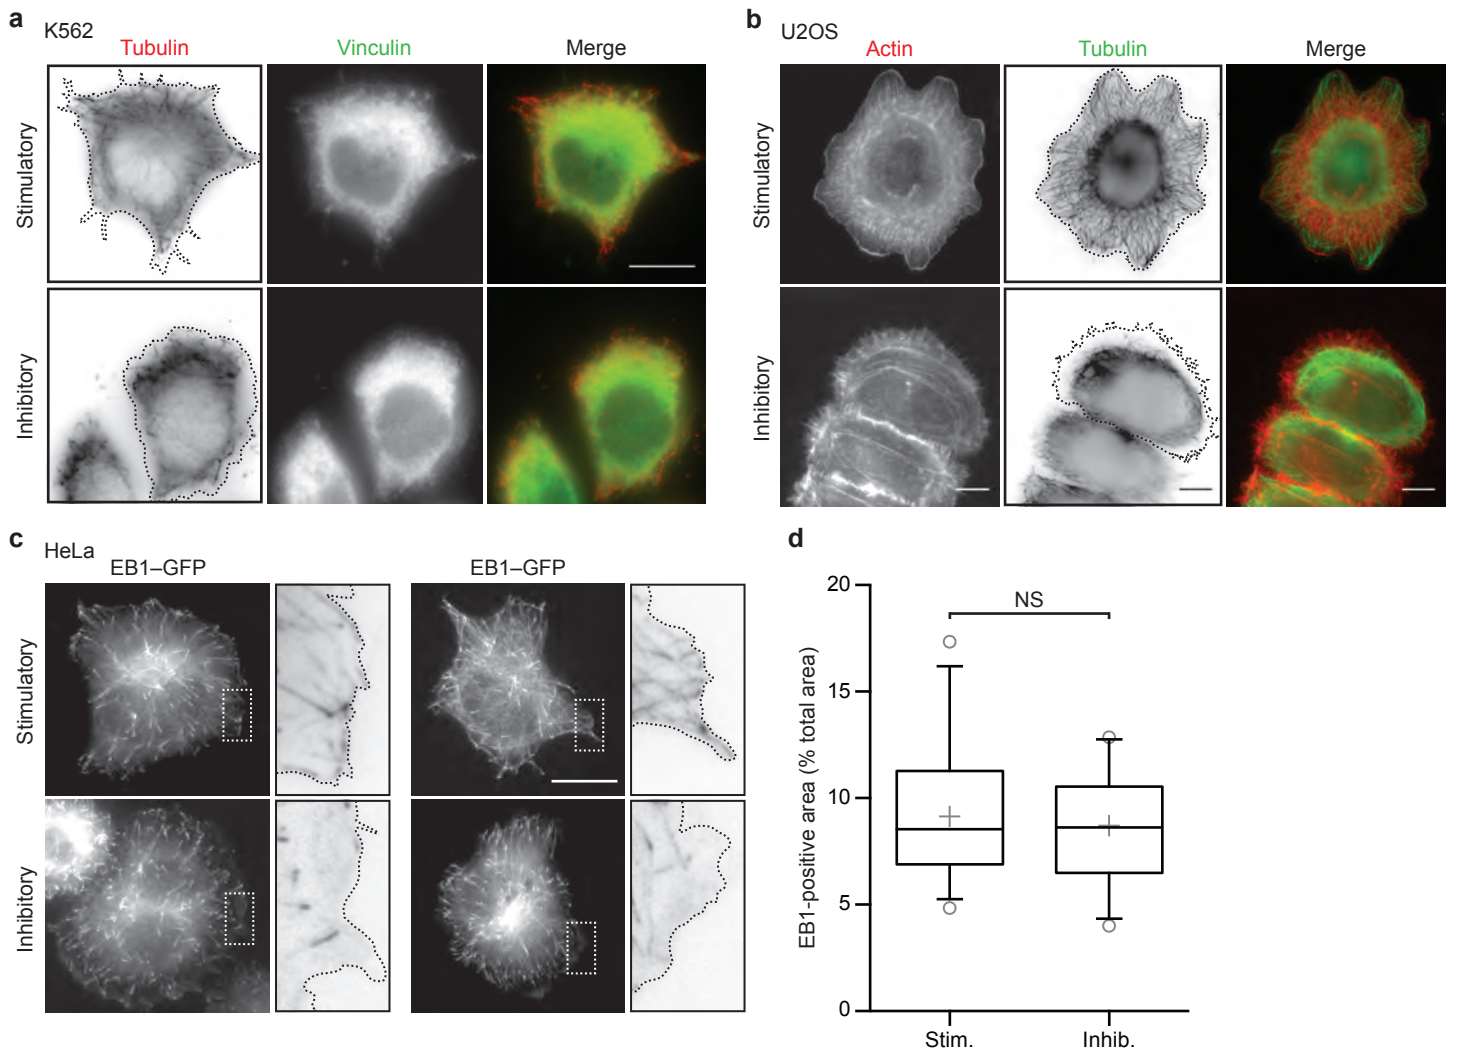

**Supplementary Figure 7 | Microtubule growth in cells spread on stimulatory and inhibitory anti- $\beta$ 1 integrin mAbs.**

(a) K562 cells were stained for  $\alpha$ -tubulin (red) and vinculin (green). (b) U2OS cells were stained for actin (red) and  $\alpha$ -tubulin (green). (c) HeLa cells expressing EB1-GFP were imaged to visualise microtubule plus ends. Two representative images are shown. Inverted contrast images correspond to areas highlighted in white dotted boxes; black dotted lines indicate cell periphery. Scale bars, 10  $\mu$ m. (d) HFF cells were stained for EB1. Regions away from the cell periphery with areas of at least 40  $\mu$ m<sup>2</sup> were selected at random, and the amount of EB1-positive signal was determined as a percentage of the total measured area. Box-and-whisker plot shows the median (line), mean (plus sign), 25th and 75th percentiles (box) and 5th and 95th percentiles (whiskers) ( $n = 26$  and 29 cell areas for stimulatory and inhibitory, respectively). Comparison between the two independent groups was determined by two-tailed Mann-Whitney test.

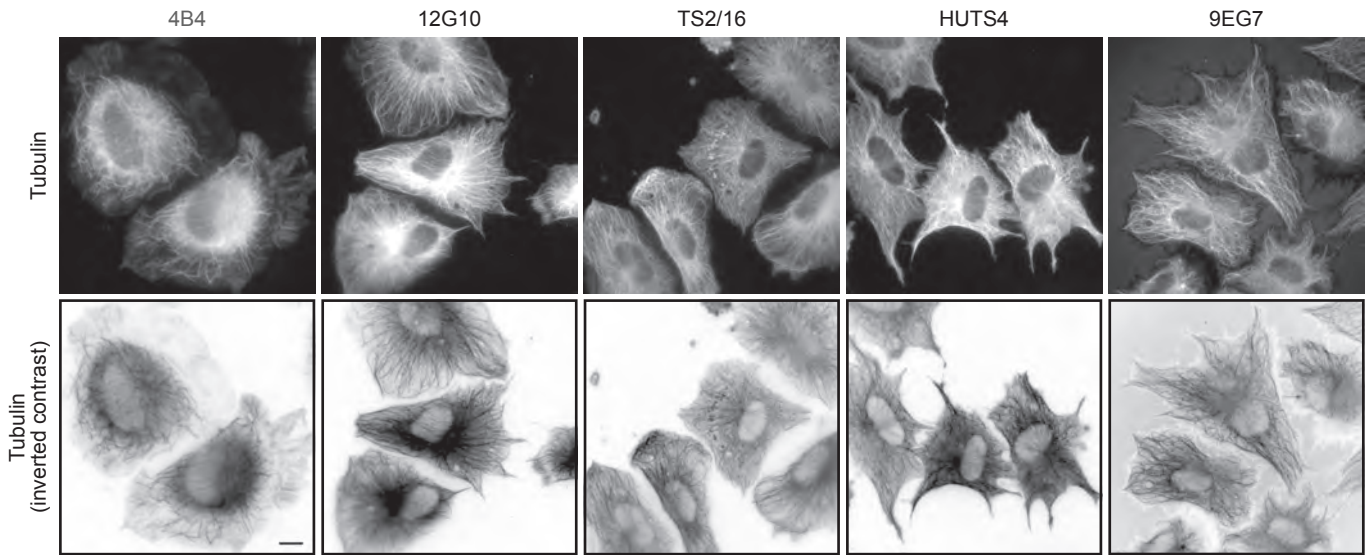

**Supplementary Figure 8 | Microtubule growth in cells spread on additional stimulatory anti- $\beta$ 1 integrin mAbs.**

HFF cells were spread on the inhibitory and stimulatory mAbs used throughout this study (4B4 and 12G10, respectively) in addition to other stimulatory anti- $\beta$ 1 integrin mAbs (TS2/16, HUTS4 and 9EG7). Cells were stained for  $\alpha$ -tubulin and imaged to visualise microtubule growth to the cell periphery. Inverted contrast images are also shown. Scale bar, 10  $\mu$ m.



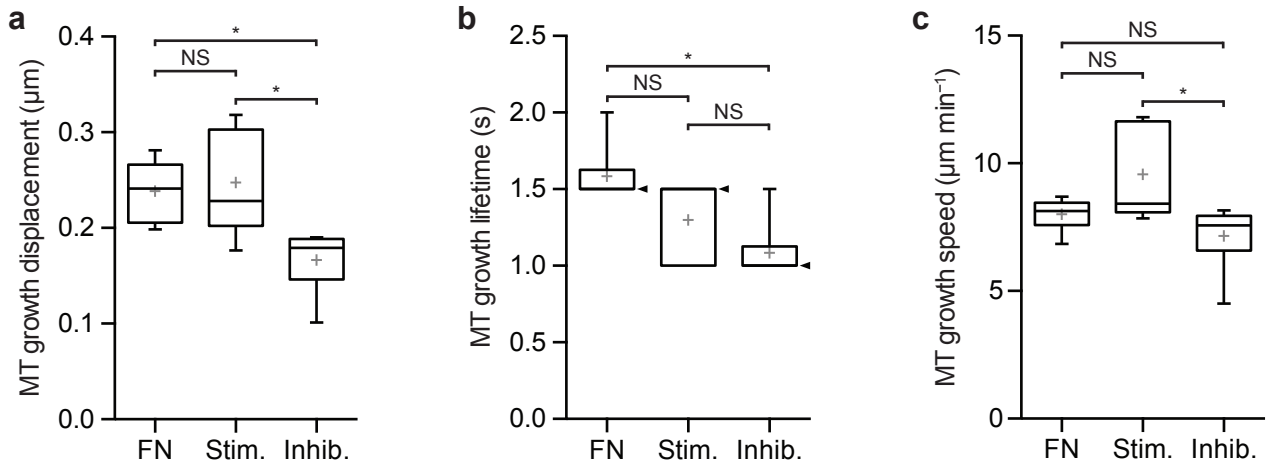

**Supplementary Figure 9 | Microtubule growth dynamics in cells spread on activity-specific anti-integrin mAbs.**

(a–c) HeLa cells expressing EB3–GFP were spread on FN, stimulatory and inhibitory mAbs and imaged by live TIRF microscopy. Microtubule plus-end dynamics were tracked and analysed using plusTipTracker<sup>4</sup> (see Supplementary Movies 3–5). Median values for displacement (a), lifetime (b) and speed (c) of +TIP comet track growth were determined for each cell from at least 700 tracks per cell. Box-and-whisker plots show the median (line), mean (plus sign), 25th and 75th percentiles (box) and 5th and 95th percentiles (whiskers) ( $n = 6, 5$  and  $6$  cells for FN, stimulatory and inhibitory, respectively). Arrowheads indicate obscured median lines. \* $P < 0.05$ ; Kruskal–Wallis test with Dunn’s multiple comparisons test.



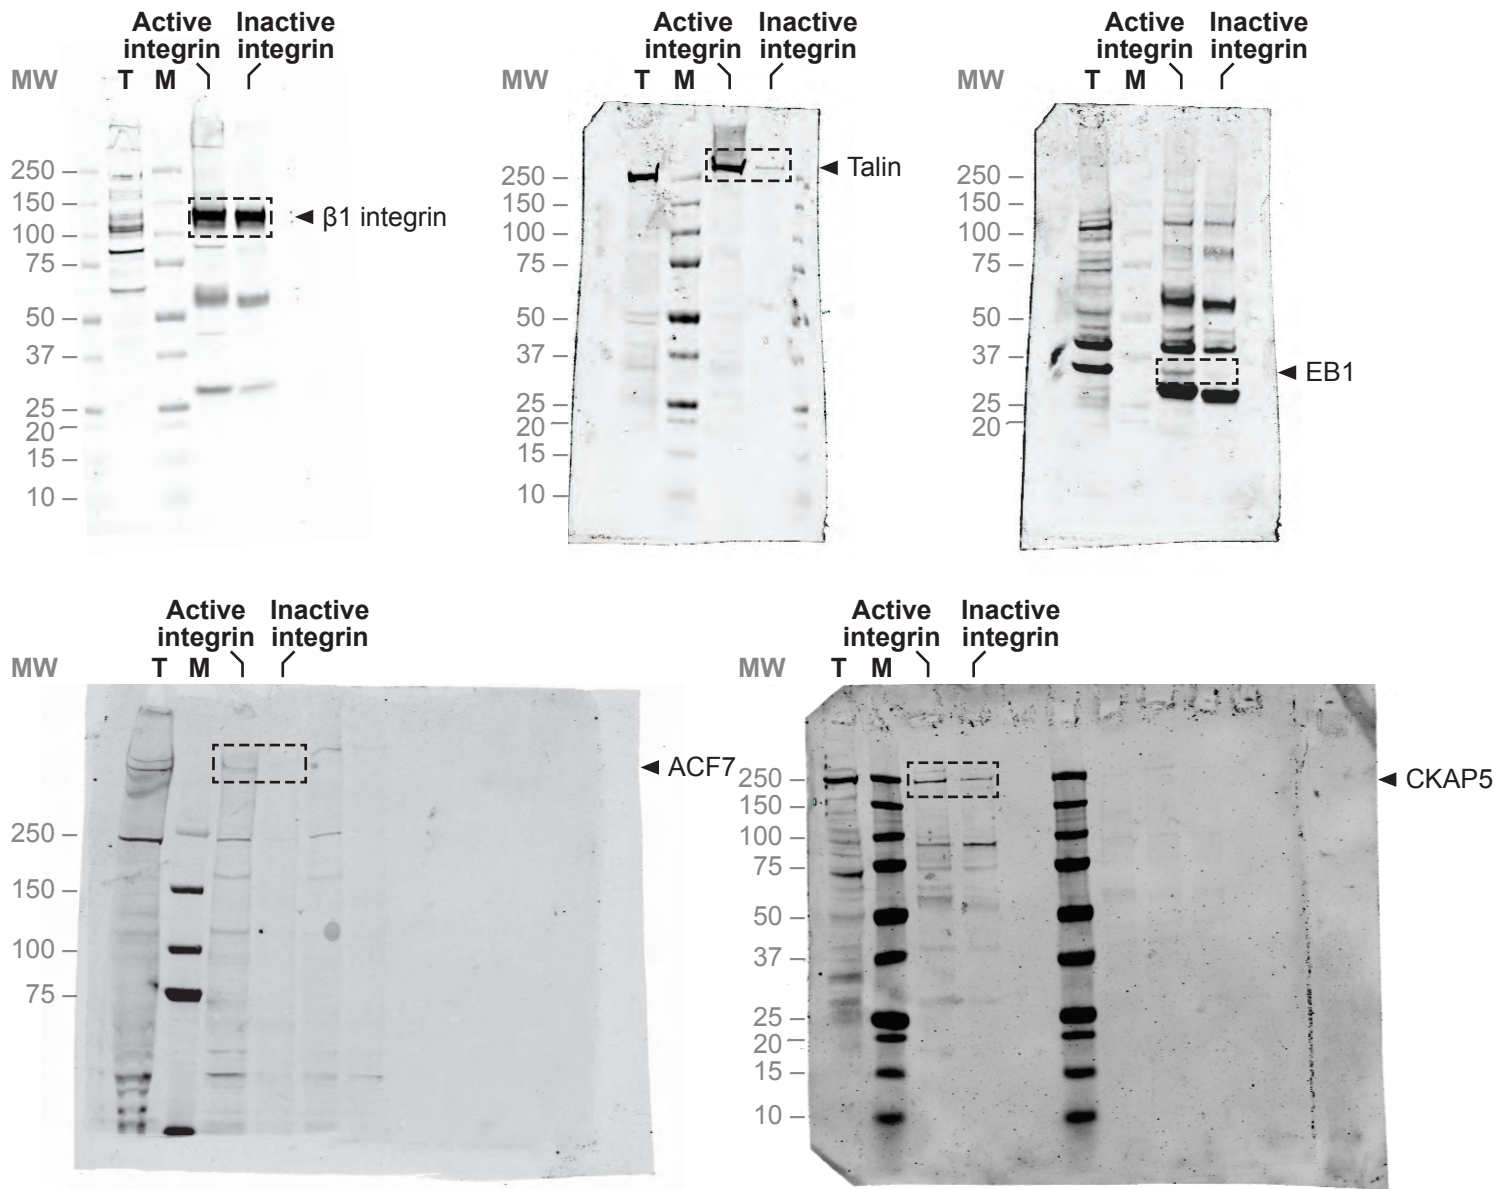

**Supplementary Figure 10 | Original blots.** Dashed boxes indicate cropped regions shown in Figure 4a. Arrowheads indicate expected band position for each protein probed. MW, molecular weight (kDa), grey font; T, total cell lysate; M, molecular weight marker.

Supplementary Table 1 | Hierarchical clustering analysis of proteins identified in active or inactive integrin adhesion complexes.

| #    | API Accession | UniProtKB Accession | Gene name | Protein name                                                         | Relative abundance (mean normalized spectral count) x10 <sup>3</sup> |                 |                   | Fold enrichment (active/inactive) |                   | Specific enrichment (active/inactive) |                   | Cluster <sup>1</sup> | Adhesome <sup>2</sup> | Hierarchical clustering |
|------|---------------|---------------------|-----------|----------------------------------------------------------------------|----------------------------------------------------------------------|-----------------|-------------------|-----------------------------------|-------------------|---------------------------------------|-------------------|----------------------|-----------------------|-------------------------|
|      |               |                     |           |                                                                      | MW (kDa)                                                             | Active integrin | Inactive integrin | Active integrin                   | Inactive integrin | Active integrin                       | Inactive integrin |                      |                       |                         |
| 252  | PI00129318    | P04406              | GAPDH     | Glyceraldehyde-3-phosphate dehydrogenase                             | 36                                                                   | 2.036           | 2.266             | 0.90                              | False             | False                                 | Unenriched        | -                    | -                     |                         |
| 406  | PI00115380    | Q01611              | NCP1      | Nuclear cap binding protein subunit 1                                | 92                                                                   | 0.321           | 0.280             | 0.90                              | False             | False                                 | Unenriched        | -                    | -                     |                         |
| 62   | PI00121743    | P02008              | HBZ       | Hemoglobin subunit zeta                                              | 16                                                                   | 14.302          | 15.861            | 0.90                              | False             | False                                 | Unenriched        | -                    | -                     |                         |
| 237  | PI00121493    | P06866              | RPL20     | 40S ribosomal protein S20                                            | 13                                                                   | 5.655           | 6.277             | 0.90                              | False             | False                                 | Unenriched        | -                    | -                     |                         |
| 1325 | PI00107485    | N01644              | NUP43     | Isomorph 1 of Nup93 homologous phosphoprotein phosphohydrolase 2     | 20                                                                   | 0.324           | 0.359             | 0.90                              | False             | False                                 | Unenriched        | -                    | -                     |                         |
| 246  | PI00131517    | Q14566              | MCM6      | DNA replication licensing factor MCM6                                | 93                                                                   | 0.835           | 0.910             | 0.92                              | False             | False                                 | Unenriched        | -                    | -                     |                         |
| 434  | PI00108865    | P06780              | CANX2B    | Caspein kinase II subunit beta                                       | 25                                                                   | 1.783           | 1.952             | 0.91                              | False             | False                                 | Unenriched        | -                    | -                     |                         |
| 611  | PI00120252    | P30101              | PDK4      | Protein disulfide-isomerase 4b                                       | 52                                                                   | 0.023           | 0.022             | 0.91                              | False             | False                                 | Unenriched        | -                    | -                     |                         |
| 640  | PI00373877    | Q58K21              | ZNF326    | Isomorph 1 of Zinc finger protein 326                                | 66                                                                   | 0.390           | 0.427             | 0.91                              | False             | False                                 | Unenriched        | -                    | -                     |                         |
| 39   | PI00121565    | P09551              | HNRNP1A   | Isomorph A1-B of Heterogeneous nuclear ribonucleoprotein A1          | 39                                                                   | 7.671           | 8.432             | 0.91                              | False             | False                                 | Unenriched        | -                    | -                     |                         |
| 1369 | PI00100324    | Q13617              | TRAPPC3   | Trafficking protein particle complex subunit 3                       | 20                                                                   | 0.414           | 0.456             | 0.92                              | False             | False                                 | Unenriched        | -                    | -                     |                         |
| 1220 | PI00107339    | Q98944              | GNB1L     | Isomorph 1 of Guanine nucleotide-binding protein beta-like protein 1 | 36                                                                   | 0.252           | 0.278             | 0.91                              | False             | False                                 | Unenriched        | -                    | -                     |                         |
| 90   | PI00376798    | P62913              | RPL11     | Isomorph 1 of 60S ribosomal protein L11                              | 20                                                                   | 9.149           | 9.906             | 0.92                              | False             | False                                 | Unenriched        | -                    | -                     |                         |
| 201  | PI00100843    | P40182              | XRN2      | 40S ribosomal protein S5                                             | 109                                                                  | 0.204           | 0.217             | 0.94                              | False             | False                                 | Unenriched        | -                    | -                     |                         |
| 1302 | PI00117509    | Q8IUR0              | TRAPPC5   | Trafficking protein particle complex subunit 5                       | 21                                                                   | 0.408           | 0.441             | 0.93                              | False             | False                                 | Unenriched        | -                    | -                     |                         |
| 68   | PI00121570    | P39019              | RPL59     | 40S ribosomal protein S19                                            | 16                                                                   | 13.384          | 14.196            | 0.94                              | False             | False                                 | Unenriched        | -                    | -                     |                         |
| 568  | PI00100151    | Q8I906              | XRN2      | Isomorph 1 of 5' to 3' exonuclease XRN2                              | 109                                                                  | 0.204           | 0.217             | 0.94                              | False             | False                                 | Unenriched        | -                    | -                     |                         |
| 885  | PI00132650    | Q8NH45              | NUP35     | Nucleoporin NUP35                                                    | 35                                                                   | 0.584           | 0.624             | 0.94                              | False             | False                                 | Unenriched        | -                    | -                     |                         |
| 1208 | PI00101688    | Q9Y488              | TELO2     | Telomere length regulation protein TEL2 homolog                      | 92                                                                   | 0.067           | 0.072             | 0.93                              | False             | False                                 | Unenriched        | -                    | -                     |                         |
| 171  | PI00101830    | P33992              | MCM5      | DNA replication licensing factor MCM5                                | 82                                                                   | 1.344           | 1.329             | 1.01                              | False             | False                                 | Unenriched        | -                    | -                     |                         |
| 49   | PI00105448    | P05787              | KRT8      | Keratin, type II cytoskeletal 8                                      | 54                                                                   | 6.229           | 6.216             | 1.00                              | False             | False                                 | Unenriched        | -                    | -                     |                         |
| 1031 | PI001002895   | P63272              | SPT4      | Transcription elongation factor SPT4                                 | 13                                                                   | 0.836           | 0.834             | 1.00                              | False             | False                                 | Unenriched        | -                    | -                     |                         |
| 843  | PI00105596    | P48070              | KTM6      | Proteasome subunit beta type 6                                       | 209                                                                  | 0.708           | 0.704             | 1.01                              | False             | False                                 | Unenriched        | -                    | -                     |                         |
| 157  | PI001064304   | P62826              | RAN       | GTP-binding nuclear protein Ran                                      | 24                                                                   | 5.233           | 5.082             | 1.03                              | False             | False                                 | Unenriched        | -                    | -                     |                         |
| 310  | PI001027252   | Q59623              | PHB2      | Prohibitin 2                                                         | 33                                                                   | 2.064           | 2.017             | 1.02                              | False             | False                                 | Unenriched        | -                    | -                     |                         |
| 785  | PI001003588   | Q14254              | ETS1E1    | Eukaryotic translation elongation factor 1 epsilon-1                 | 200                                                                  | 0.827           | 0.881             | 1.02                              | False             | False                                 | Unenriched        | -                    | -                     |                         |
| 1289 | PI00171665    | Q8NF94              | NUP37     | Nucleoporin Nup37                                                    | 37                                                                   | 0.195           | 0.190             | 1.03                              | False             | False                                 | Unenriched        | -                    | -                     |                         |
| 1451 | PI00120142    | Q8WV12              | NUPC202   | Nucleic acid-containing protein 2                                    | 18                                                                   | 2.244           | 0.238             | 1.03                              | False             | False                                 | Unenriched        | -                    | -                     |                         |
| 118  | PI00116565    | P42937              | PNA       | Peptidyl prolyl co-trans isomerase A                                 | 85                                                                   | 8.868           | 9.275             | 0.96                              | False             | False                                 | Unenriched        | -                    | -                     |                         |
| 261  | PI00129355    | Q92499              | DDX1      | ATP-dependent RNA helicase DDX1                                      | 82                                                                   | 0.976           | 1.020             | 0.96                              | False             | False                                 | Unenriched        | -                    | -                     |                         |
| 256  | PI00121044    | Q8JUM9              | RALY      | Isomorph 1 of RNA-binding protein Raly                               | 30                                                                   | 2.600           | 2.709             | 0.96                              | False             | False                                 | Unenriched        | -                    | -                     |                         |
| 1076 | PI00110241    | Q8I906              | UBR5      | Ubiquitin-like protein 5                                             | 16                                                                   | 1.979           | 1.750             | 0.96                              | False             | False                                 | Unenriched        | -                    | -                     |                         |
| 377  | PI00120706    | P69891              | HGB1      | Hemoglobin subunit gamma-1                                           | 16                                                                   | 20.032          | 20.879            | 0.96                              | False             | False                                 | Unenriched        | -                    | -                     |                         |
| 1104 | PI001025717   | Q17541              | MTX2      | Mexitin-2                                                            | 30                                                                   | 0.331           | 0.345             | 0.96                              | False             | False                                 | Unenriched        | -                    | -                     |                         |
| 1224 | PI00121128    | Q15247              | CIL2F     | Chloride intracellular channel protein 2                             | 20                                                                   | 0.365           | 0.384             | 0.96                              | False             | False                                 | Unenriched        | -                    | -                     |                         |
| 645  | PI001000811   | F28072              | PSMB6     | Proteasome subunit beta type-6                                       | 25                                                                   | 1.141           | 1.177             | 0.97                              | False             | False                                 | Unenriched        | -                    | -                     |                         |
| 461  | PI001029744   | Q04837              | SGBP1     | Single-stranded DNA-binding protein, mitochondrial                   | 17                                                                   | 2.499           | 2.598             | 0.96                              | False             | False                                 | Unenriched        | -                    | -                     |                         |
| 663  | PI00101854    | Q14847              | CABP8     | Calcium-inducible RNA-binding protein                                | 19                                                                   | 1.217           | 1.217             | 0.96                              | False             | False                                 | Unenriched        | -                    | -                     |                         |
| 966  | PI001003217   | Q99436              | PSMB7     | Proteasome subunit beta type-7                                       | 30                                                                   | 0.322           | 0.334             | 0.96                              | False             | False                                 | Unenriched        | -                    | -                     |                         |
| 482  | PI001003482   | Q16698              | DCR1      | 2,4-dienoyl-CoA reductase, mitochondrial                             | 36                                                                   | 1.214           | 1.226             | 0.99                              | False             | False                                 | Unenriched        | -                    | -                     |                         |
| 372  | PI001005513   | Q10181              | UBR2      | Splicing factor UBR2 55 kDa subunit                                  | 29                                                                   | 2.025           | 2.049             | 0.99                              | False             | False                                 | Unenriched        | -                    | -                     |                         |
| 628  | PI001295485   | Q95757              | HSP9AL    | Heat shock 70 kDa protein 9L                                         | 94                                                                   | 0.070           | 0.071             | 0.99                              | False             | False                                 | Unenriched        | -                    | -                     |                         |
| 147  | PI001016010   | Q13365              | PCBP1     | Poly(C)-binding protein 1                                            | 37                                                                   | 4.024           | 4.028             | 1.00                              | False             | False                                 | Unenriched        | -                    | -                     |                         |
| 680  | PI001021719   | Q14254              | HAT1E1    | Human acetyltransferase type B catalytic subunit                     | 100                                                                  | 0.527           | 0.528             | 1.00                              | False             | False                                 | Unenriched        | -                    | -                     |                         |
| 463  | PI001011274   | Q14979              | HNRPLD    | Isomorph 1 of Heterogeneous nuclear ribonucleoprotein D-like         | 46                                                                   | 2.010           | 2.018             | 1.00                              | False             | False                                 | Unenriched        | -                    | -                     |                         |
| 687  | PI001202219   | P35606              | COPB2     | Coatomer subunit beta 2                                              | 102                                                                  | 0.225           | 0.226             | 1.00                              | False             | False                                 | Unenriched        | -                    | -                     |                         |
| 248  | PI001206369   | Q80213              | NSUN2     | RNA (cytosolic 5'-methyltransferase NSUN2                            | 85                                                                   | 0.866           | 0.879             | 0.99                              | False             | False                                 | Unenriched        | -                    | -                     |                         |
| 259  | PI001017303   | P43246              | MST2      | DNA mismatch repair protein Msh2                                     | 105                                                                  | 0.676           | 0.687             | 0.99                              | False             | False                                 | Unenriched        | -                    | -                     |                         |
| 515  | PI001219757   | P09211              | GSTP1     | Glutathione S-transferase P                                          | 23                                                                   | 1.700           | 1.731             | 0.98                              | False             | False                                 | Unenriched        | -                    | -                     |                         |
| 408  | PI001011200   | Q43175              | PHGDH     | D-3-phosphoglycerate dehydrogenase                                   | 57                                                                   | 1.048           | 1.088             | 0.98                              | False             | False                                 | Unenriched        | -                    | -                     |                         |
| 100  | PI001292145   | P48668              | KRT6A     | Keratin, type II cytoskeletal 6A                                     | 30                                                                   | 3.469           | 3.704             | 0.98                              | False             | False                                 | Unenriched        | -                    | -                     |                         |
| 1834 | PI001015011   | Q8NKH8              | FBX12     | Isomorph 1 of F-box/LRR-repeat protein 12                            | 37                                                                   | 0.058           | 0.060             | 0.97                              | False             | False                                 | Unenriched        | -                    | -                     |                         |
| 1924 | PI001095952   | Q8I906              | PHF3      | Peptidyl prolyl co-trans isomerase                                   | 33                                                                   | 0.065           | 0.067             | 0.97                              | False             | False                                 | Unenriched        | -                    | -                     |                         |
| 52   | PI001011296   | P62260              | RPL20     | 40S ribosomal protein S20                                            | 18                                                                   | 13.833          | 15.218            | 0.95                              | False             | False                                 | Unenriched        | -                    | -                     |                         |
| 172  | PI001054788   | P05783              | KRT18     | Keratin, type I cytoskeletal 18                                      | 48                                                                   | 3.139           | 3.703             | 0.85                              | False             | False                                 | Unenriched        | -                    | -                     |                         |
| 255  | PI001037385   | Q75400              | PPP4R4A   | Isomorph 1 of Pre-mRNA-processing factor 40 homolog A                | 109                                                                  | 0.473           | 0.558             | 0.85                              | False             | False                                 | Unenriched        | -                    | -                     |                         |
| 911  | PI001078612   | P48021              | LMNB1     | Nuclear lamina protein LMNB1                                         | 38                                                                   | 0.178           | 0.178             | 0.85                              | False             | False                                 | Unenriched        | -                    | -                     |                         |
| 901  | PI001095498   | Q8JUC8              | CDK11A    | PITSLRE serine/threonine protein kinaseCDK11                         | 90                                                                   | 0.140           | 0.166             | 0.84                              | False             | False                                 | Unenriched        | -                    | -                     |                         |
| 134  | PI001013936   | Q15717              | ELAVL1    | ELAV-like protein 1                                                  | 39                                                                   | 3.563           | 4.235             | 0.84                              | False             | False                                 | Unenriched        | -                    | -                     |                         |
| 328  | PI001055363   | Q17802              | TAGLN2    | Transgelin-2                                                         | 22                                                                   | 1.566           | 1.584             | 0.84                              | False             | False                                 | Unenriched        | -                    | -                     |                         |
| 1060 | PI001038625   | Q80723              | HNRN      | Hornrin                                                              | 282                                                                  | 0.040           | 0.047             | 0.85                              | False             | False                                 | Unenriched        | -                    | -                     |                         |
| 449  | PI001217966   | P00338              | LDHA      | Isomorph 1 of L-lactate dehydrogenase A chain                        | 37                                                                   | 1.140           | 1.127             | 0.87                              | False             | False                                 | Unenriched        | -                    | -                     |                         |
| 10   | PI001220138   | Q10181              | SIRT      | Isomorph 2 of Sirtuin 6 nuclear effector molecule homolog            | 102                                                                  | 0.442           | 0.510             | 0.87                              | False             | False                                 | Unenriched        | -                    | -                     |                         |
| 772  | PI001000861   | Q14847              | LASP1     | Isomorph 1 of LIM and SH3 domain protein 1                           | 30                                                                   | 0.486           | 0.790             | 0.87                              | False             | False                                 | Unenriched        | -                    | -                     |                         |
| 288  | PI001008240   | P56192              | MARS      | Methionyl-tRNA synthetase, cytoplasmic                               | 101                                                                  | 0.692           | 0.805             | 0.86                              | False             | False                                 | Unenriched        | -                    | -                     |                         |
| 543  | PI001001346   | Q14847              | MARS      | Peptidyl prolyl co-trans isomerase H                                 | 19                                                                   | 1.933           | 1.933             | 0.86                              | False             | False                                 | Unenriched        | -                    | -                     |                         |
| 1533 | PI001061989   | Q96919              | CDC45     | Sorcin                                                               | 28                                                                   | 1.129           | 0.149             | 0.87                              | False             | False                                 | Unenriched        | -                    | -                     |                         |
| 241  | PI001055689   | Q9Y380              | C22orf28  | UPF027 protein C22orf28                                              | 55                                                                   | 1.275           | 1.444             | 0.88                              | False             | False                                 | Unenriched        | -                    | -                     |                         |
| 10   | PI001002156   | Q10181              | STUB1     | Isomorph 1 of STUB1 homologous and U-box containing protein 1        | 18                                                                   | 0.402           | 0.558             | 0.88                              | False             | False                                 | Unenriched        | -                    | -                     |                         |
| 251  | PI001012066   | Q15366              | PCBP2     | poly(C)-binding protein 2 isomorph b                                 | 38                                                                   | 4.271           | 4.802             | 0.89                              | False             | False                                 | Unenriched        | -                    | -                     |                         |
| 100  | PI001008438   | P46783              | RPL10     | 40S ribosomal protein S10                                            | 19                                                                   | 7.035           | 7.944             | 0.89                              | False             | False                                 | Unenriched        | -                    | -                     |                         |
| 159  | PI001021719   | Q14254              | RPL20     | 40S ribosomal protein S14                                            | 18                                                                   | 7.624           | 8.605             | 0.89                              | False             | False                                 | Unenriched        | -                    | -                     |                         |
| 1379 | PI001045436   | P04040              | CAT       | Catalase                                                             | 60                                                                   | 0.126           | 0.142             | 0.89                              | False             | False                                 | Unenriched        | -                    | -                     |                         |
| 753  | PI001074421   | Q60773              | EIF4E2    | Eukaryotic translation initiation factor 4E type 2                   | 28                                                                   | 0.741           | 0.838             | 0.88                              | False             | False                                 | Unenriched        | -                    | -                     |                         |
| 773  | PI001003863   | P47472              | ACAT1     | Acetyl-CoA acetyltransferase, mitochondrial                          | 10                                                                   | 0.489           | 0.553             | 0.88                              | False             | False                                 | Unenriched        | -                    | -                     |                         |
| 1512 | PI001045438   | P44773              | TPP1      | Putative uncharacterized protein TPP1                                | 20                                                                   | 0.088           | 0.087             | 0.88                              | False             | False                                 | Unenriched        | -                    | -                     |                         |
| 1287 | PI001328815   | Q8I906              | USP48     | USP48 protein                                                        | 121                                                                  | 0.057           | 0.064             | 0.89                              | False             | False                                 | Unenriched        | -                    | -                     |                         |
| 85   | PI001798360   | P62979              | SANP1     | SANP1 protein                                                        | 18                                                                   | 9.747           | 11.992            | 0.83                              | False             | False                                 | Unenriched        | -                    | -                     |                         |
| 717  | PI001010777   | Q17313              | HDAC9     | Protein HDAC9 homolog 2                                              | 34                                                                   | 0.642           | 0.769             | 0.83                              | False             | False                                 | Unenriched        | -                    | -                     |                         |
| 657  | PI001015217   | P07195              | LDHB      | L-lactate dehydrogenase B chain                                      | 37                                                                   | 0.979           | 1.179             | 0.83                              | False             | False                                 | Unenriched        | -                    | -                     |                         |
| 458  | PI001017412   | P35250              | RFC2      | Isomorph 1 of Replication factor C subunit 2                         | 39                                                                   | 0.907           | 1.094             | 0.83                              | False             | False                                 | Unenriched        | -                    | -                     |                         |
| 1127 | PI00121128    | P62616              | CIL1E     | ADP-ribosylation factor-like protein 1                               | 20                                                                   | 0.342           | 0.413             | 0.83                              | False             | False                                 | Unenriched        | -                    | -                     |                         |
| 320  | PI001013774   | Q13547              | HDAC1     | Histone deacetylase 1                                                | 55                                                                   | 0.936           | 1.144             | 0.82                              | False             | False                                 | Unenriched        | -                    | -                     |                         |
| 864  | PI001010324   | Q8M040              | LSM12     | Isomorph 1 of Protein LSM12 homolog                                  | 22                                                                   | 0.861           | 1.047             | 0.82                              | False             | False                                 | Unenriched        | -                    | -                     |                         |
| 1435 | PI001000949   | Q10250              | PCAF      | Proteasome inhibitor PIS1 subunit                                    | 50                                                                   | 0.134           | 0.165             | 0.81                              | False             | False                                 | Unenriched        | -                    | -                     |                         |
| 1480 | PI001293350   | Q95958              | TM2XN     | Transmembrane-associated protein X                                   | 33                                                                   | 0.144           | 0.177             | 0.81                              | False             | False                                 | Unenriched        | -                    | -                     |                         |
| 1382 | PI001291559   | Q9Y782              | RN202     | E3 ubiquitin-protein ligase BR1A                                     | 114                                                                  | 0.047           | 0.058             | 0.81                              | False             | False                                 | Unenriched        | -                    | -                     |                         |
| 1799 | PI001004416   | Q14847              | CANX2A    | Charged multivesicular-body protein 2a                               | 25                                                                   | 0.088           | 0.102             | 0.82                              | False             | False                                 | Unenriched        | -                    | -                     |                         |
| 669  | PI001032406   | Q06884              | DNAI2A    | DnaI homolog subfamily A member 2                                    | 46                                                                   | 0.424           | 0.528             | 0.80                              | False             | False                                 | Unenriched        | -                    | -                     |                         |
| 649  | PI001029733   | Q04828              | AKR1C1    | Aldo-keto reductase family 1 member C1                               | 37                                                                   | 0.596           | 0.743             | 0.80                              | False             | False                                 | Unenriched        | -                    | -                     |                         |
| 1457 | PI001021230   | P14625              | HSP90A    | Endoplasmic reticulum chaperone HSP90A                               | 82                                                                   | 0.226           | 0.280             | 0.80                              | False             | False                                 | Unenriched        | -                    | -                     |                         |
| 1126 | PI00101380    | P41223              | MTOR      | Protein BUD31 homolog                                                | 17                                                                   | 0.555           | 0.695             | 0.80                              | False             | False                                 | Unenriched        | -                    | -                     |                         |
| 1300 | PI001291646   | Q15741              | MTHFD1L   | Methylenetetrahydrofolate dehydrogenase (NADP+ dependent) 1-like     | 106                                                                  | 0.056           | 0.070             | 0.80                              | False             | False                                 | Unenriched        | -                    | -                     |                         |
| 313  | PI001012535   | P31688              | RNAP2     | DnaI homolog subfamily A member 1                                    | 15                                                                   |                 |                   |                                   |                   |                                       |                   |                      |                       |                         |

Supplementary Table 1 (cont.) | Hierarchical clustering analysis of proteins identified in active or inactive integrin adhesion complexes.

| #    | API Accession | UniProtKB Accession | Gene name | Protein name                                                                                | Protein MW (kDa) | Relative abundance (mean normalized spectral counts) × 10 <sup>3</sup> |                   | Fold enrichment (active/inactive) |                                | Specific enrichment <sup>†</sup> |                                | Adhesome <sup>‡</sup> | Hierarchical clustering |
|------|---------------|---------------------|-----------|---------------------------------------------------------------------------------------------|------------------|------------------------------------------------------------------------|-------------------|-----------------------------------|--------------------------------|----------------------------------|--------------------------------|-----------------------|-------------------------|
|      |               |                     |           |                                                                                             |                  | Active integrin                                                        | Inactive integrin | Active integrin <sup>†</sup>      | Inactive integrin <sup>†</sup> | Active integrin <sup>†</sup>     | Inactive integrin <sup>†</sup> |                       |                         |
| 826  | IP00430812    | P62333              | CNBP      | Isomorph 1 of Cellular nuclear acid-binding protein                                         | 19               | 1.121                                                                  | 1.078             | 1.04                              | False                          | False                            | Unenriched                     | -                     |                         |
| 428  | IP00021926    | P62333              | PSM6C     | 26S protease regulatory subunit S10B                                                        | 44               | 1.054                                                                  | 1.012             | 1.04                              | False                          | False                            | Unenriched                     | -                     |                         |
| 177  | IP00021926    | P62333              | PSM6C     | 26S protease regulatory subunit S10B                                                        | 44               | 1.054                                                                  | 1.012             | 1.04                              | False                          | False                            | Unenriched                     | -                     |                         |
| 641  | IP00007019    | Q9Y3C6              | PRLL      | Prolyl 4-hydroxylase                                                                        | 68               | 1.040                                                                  | 1.014             | 1.04                              | False                          | False                            | Unenriched                     | -                     |                         |
| 1656 | IP00128658    | Q8R9H5              | WDR74     | Isomorph 1 of Set1/Asf2 histone methyltransferase complex subunit ASF2                      | 69               | 0.942                                                                  | 0.940             | 1.05                              | False                          | False                            | Unenriched                     | -                     |                         |
| 43   | IP00418471    | P08670              | VIM       | Vimentin                                                                                    | 54               | 5.789                                                                  | 5.413             | 1.07                              | False                          | False                            | Unenriched                     | YES                   |                         |
| 1466 | IP00001134    | Q9YS80              | RBM7      | RNA-binding protein 7                                                                       | 31               | 0.221                                                                  | 0.206             | 1.07                              | False                          | False                            | Unenriched                     | -                     |                         |
| 186  | IP00020023    | Q02543              | RPL8A     | 60S ribosomal protein L8a                                                                   | 21               | 4.742                                                                  | 4.415             | 1.07                              | False                          | False                            | Unenriched                     | -                     |                         |
| 2002 | IP00155601    | Q9H069              | MACROD1   | MACRO domain-containing protein 1                                                           | 36               | 0.098                                                                  | 0.091             | 1.08                              | False                          | False                            | Unenriched                     | -                     |                         |
| 1017 | IP00016339    | P51148              | RAB5C     | Ras-related protein Rab-5C                                                                  | 23               | 0.654                                                                  | 0.607             | 1.08                              | False                          | False                            | Unenriched                     | -                     |                         |
| 658  | IP00172580    | Q72324              | NUP54     | Nucleoporin 54kDa variant (Fragment)                                                        | 56               | 0.496                                                                  | 0.462             | 1.07                              | False                          | False                            | Unenriched                     | -                     |                         |
| 1415 | IP00017767    | Q9Y735              | MGST2     | Microsomal glutathione S-transferase 2                                                      | 17               | 0.496                                                                  | 0.465             | 1.07                              | False                          | False                            | Unenriched                     | -                     |                         |
| 784  | IP00063729    | Q96011              | THOC3     | THO complex subunit 3                                                                       | 42               | 0.411                                                                  | 0.387             | 1.06                              | False                          | False                            | Unenriched                     | -                     |                         |
| 1125 | IP00005162    | O15145              | ARPC3     | Actin-related protein 2/3 complex subunit 74                                                | 21               | 0.504                                                                  | 0.477             | 1.06                              | False                          | False                            | Unenriched                     | YES*                  |                         |
| 1316 | IP00021906    | Q8W0X3              | RPS19B1   | Active regulator of SMT1                                                                    | 15               | 0.643                                                                  | 0.608             | 1.06                              | False                          | False                            | Unenriched                     | -                     |                         |
| 157  | IP00411058    | P08965              | RPS4      | 33 kDa protein                                                                              | 33               | 8.620                                                                  | 7.824             | 1.10                              | False                          | False                            | Unenriched                     | -                     |                         |
| 425  | IP00017334    | P35232              | PIH1      | Prohibitin                                                                                  | 30               | 1.745                                                                  | 1.589             | 1.10                              | False                          | False                            | Unenriched                     | -                     |                         |
| 848  | IP00029048    | Q13576              | IQGA2     | Isomorph 1 of Ras GTPase-activating-like protein IQGA2                                      | 181              | 0.054                                                                  | 0.049             | 1.10                              | False                          | False                            | Unenriched                     | -                     |                         |
| 471  | IP00029535    | P52789              | PSMA4     | Proteasome subunit alpha type-4                                                             | 29               | 1.527                                                                  | 1.384             | 1.10                              | False                          | False                            | Unenriched                     | -                     |                         |
| 1305 | IP00011736    | Q15437              | SEC28B    | Protein transport protein Sec28B                                                            | 86               | 0.093                                                                  | 0.084             | 1.11                              | False                          | False                            | Unenriched                     | -                     |                         |
| 1720 | IP00005791    | O14777              | NDC80     | Kinetochore protein NDC80 homolog                                                           | 74               | 0.050                                                                  | 0.045             | 1.11                              | False                          | False                            | Unenriched                     | -                     |                         |
| 314  | IP00028270    | Q71000              | HSP90AA1  | Isomorph 1 of Heat shock protein HSP 90-alpha                                               | 98               | 4.937                                                                  | 4.433             | 1.11                              | False                          | False                            | Unenriched                     | -                     |                         |
| 1507 | IP00024088    | Q96828              | POB1      | Isomorph 1 of Polyglutamine-binding protein 1                                               | 38               | 0.193                                                                  | 0.173             | 1.11                              | False                          | False                            | Unenriched                     | -                     |                         |
| 624  | IP00029186    | Q14604              | USP10     | Ubiquitin carboxyl-terminal hydrolase 10                                                    | 88               | 0.350                                                                  | 0.321             | 1.09                              | False                          | False                            | Unenriched                     | -                     |                         |
| 1089 | IP00021742    | P09105              | HBO1      | Isomorph 1 of HBO1 protein                                                                  | 16               | 0.891                                                                  | 0.816             | 1.09                              | False                          | False                            | Unenriched                     | -                     |                         |
| 1010 | IP00000764    | P01962              | DCAF2     | DDK1- and CLK4-associated factor 2                                                          | 60               | 0.332                                                                  | 0.306             | 1.08                              | False                          | False                            | Unenriched                     | -                     |                         |
| 1763 | IP00067959    |                     |           | 36 kDa protein                                                                              | 36               | 0.050                                                                  | 0.046             | 1.09                              | False                          | False                            | Unenriched                     | -                     |                         |
| 133  | IP00419373    | P51991              | HNRNP3A3  | Isomorph 1 of Heterogeneous nuclear ribonucleoprotein A3                                    | 40               | 3.932                                                                  | 3.377             | 1.16                              | False                          | False                            | Unenriched                     | -                     |                         |
| 1121 | IP00030781    | P23284              | STX2      | Isomorph alpha of Signal transducer and activator of transcription 1 alpha/beta             | 83               | 0.096                                                                  | 0.083             | 1.16                              | False                          | False                            | Unenriched                     | -                     |                         |
| 1273 | IP00029566    | P34932              | HSPA4     | Heat shock 70 kDa protein                                                                   | 94               | 0.118                                                                  | 0.101             | 1.17                              | False                          | False                            | Unenriched                     | -                     |                         |
| 177  | IP00074604    | Q721M5              | RPS27L    | 40S ribosomal protein S27-like                                                              | 9                | 15.863                                                                 | 13.558            | 1.17                              | False                          | False                            | Unenriched                     | -                     |                         |
| 1582 | IP00053925    | Q03117              | AIP       | Anti-hydrocortisone receptor interacting protein                                            | 38               | 0.068                                                                  | 0.061             | 1.17                              | False                          | False                            | Unenriched                     | -                     |                         |
| 541  | IP00031514    | P40937              | RPCS      | Replication factor C subunit 5                                                              | 38               | 0.942                                                                  | 0.837             | 1.13                              | False                          | False                            | Unenriched                     | -                     |                         |
| 728  | IP00021961    | P24666              | ACPI      | Isomorph 1 of Low molecular weight phosphotyrosine protein phosphatase                      | 18               | 1.440                                                                  | 1.278             | 1.13                              | False                          | False                            | Unenriched                     | -                     |                         |
| 36   | IP00048226    | P02246              | GNX1L     | Guanine nucleotide-binding protein subunit beta-2-like 1                                    | 35               | 10.477                                                                 | 9.276             | 1.13                              | False                          | False                            | Unenriched                     | YES                   |                         |
| 1056 | IP00037570    | Q53682              | SEC13     | Protein SEC13 homolog                                                                       | 36               | 0.398                                                                  | 0.351             | 1.13                              | False                          | False                            | Unenriched                     | -                     |                         |
| 1226 | IP00016752    | Q52120              | FAM88B    | Protein FAM88B                                                                              | 37               | 0.344                                                                  | 0.304             | 1.13                              | False                          | False                            | Unenriched                     | -                     |                         |
| 388  | IP00046204    | Q12324              | PNB2      | Peptidyl prolyl 4-trans isomerase B                                                         | 24               | 2.347                                                                  | 2.047             | 1.15                              | False                          | False                            | Unenriched                     | -                     |                         |
| 650  | IP00015833    | Q9N663              | CHCHD3    | Coiled-coil-helix-coiled-coil-helix domain-containing protein 3, mitochondrial              | 26               | 1.135                                                                  | 0.999             | 1.14                              | False                          | False                            | Unenriched                     | -                     |                         |
| 1087 | IP00005537    | P52815              | MRLP12    | Mitochondrial dicarboxylate carrier                                                         | 48               | 0.251                                                                  | 0.220             | 1.14                              | False                          | False                            | Unenriched                     | -                     |                         |
| 589  | IP00028985    | Q96842              | THOC5     | THO complex subunit 5                                                                       | 38               | 0.858                                                                  | 0.743             | 1.15                              | False                          | False                            | Unenriched                     | -                     |                         |
| 1624 | IP00018235    | Q9UBV8              | PEF1      | Peftin                                                                                      | 30               | 0.170                                                                  | 0.147             | 1.16                              | False                          | False                            | Unenriched                     | -                     |                         |
| 149  | IP00079560    | Q04637              | EIF4G1    | EIF4G protein                                                                               | 172              | 0.687                                                                  | 0.595             | 1.15                              | False                          | False                            | Unenriched                     | -                     |                         |
| 1585 | IP00009501    | P61970              | NUP72     | Nuclear transport factor 2                                                                  | 14               | 0.216                                                                  | 0.188             | 1.15                              | False                          | False                            | Unenriched                     | -                     |                         |
| 1674 | IP00155562    | Q9R9V8              | RNF126    | Isomorph 2 of RING finger protein 126                                                       | 34               | 0.178                                                                  | 0.154             | 1.16                              | False                          | False                            | Unenriched                     | -                     |                         |
| 30   | IP00021741    | P02100              | HBE1      | Hemoglobin subunit epsilon                                                                  | 16               | 21.577                                                                 | 20.239            | 1.07                              | False                          | False                            | Unenriched                     | -                     |                         |
| 242  | IP00016832    | P52786              | PSMA1     | Isomorph 3 of Proteasome subunit alpha type-1                                               | 30               | 2.429                                                                  | 3.400             | 0.71                              | False                          | False                            | Unenriched                     | -                     |                         |
| 422  | IP00015695    | Q04049              | WRB2      | WD repeat-containing protein 82                                                             | 86               | 1.047                                                                  | 0.961             | 0.72                              | False                          | False                            | Unenriched                     | -                     |                         |
| 1021 | IP00078309    | P41250              | GARS      | Glycyl-tRNA synthetase                                                                      | 83               | 0.139                                                                  | 0.193             | 0.72                              | False                          | False                            | Unenriched                     | -                     |                         |
| 273  | IP00011213    | Q13151              | HNRNPAD   | Heterogeneous nuclear ribonucleoprotein AD                                                  | 31               | 2.590                                                                  | 3.582             | 0.72                              | False                          | False                            | Unenriched                     | -                     |                         |
| 980  | IP00010218    | Q9H081              | ACPC2     | Kinetochore protein ACPC2                                                                   | 28               | 0.948                                                                  | 0.948             | 0.72                              | False                          | False                            | Unenriched                     | -                     |                         |
| 1146 | IP00019755    | P78417              | GSTO1     | Glutathione S-transferase omega-1                                                           | 28               | 0.342                                                                  | 0.475             | 0.72                              | False                          | False                            | Unenriched                     | -                     |                         |
| 543  | IP00021298    | Q13630              | CPFS      | Isomorph 1 of Cleavage and polyadenylation specificity factor subunit 6                     | 59               | 0.569                                                                  | 0.814             | 0.70                              | False                          | False                            | Unenriched                     | -                     |                         |
| 583  | IP00040590    | P22952              | RPL23A    | Nucleolar phosphoprotein 23                                                                 | 33               | 0.098                                                                  | 0.100             | 0.98                              | False                          | False                            | Unenriched                     | -                     |                         |
| 637  | IP00000549    | P61564              | WRB5      | WD repeat-containing protein 5                                                              | 37               | 0.568                                                                  | 0.811             | 0.70                              | False                          | False                            | Unenriched                     | -                     |                         |
| 1569 | IP00020915    | P30044              | PBXD5     | Isomorph 1 of Peroxisome biogenesis factor 5, mitochondrial                                 | 22               | 0.252                                                                  | 0.358             | 0.70                              | False                          | False                            | Unenriched                     | -                     |                         |
| 711  | IP00010201    | P48552              | PSMD8     | Proteasome 26S non-ATPase subunit 8                                                         | 40               | 0.543                                                                  | 0.807             | 0.68                              | False                          | False                            | Unenriched                     | -                     |                         |
| 925  | IP00030435    | Q9R9W8              | NFSPNAP1  | Protein Nfspan1 homolog 1                                                                   | 33               | 0.262                                                                  | 0.368             | 0.71                              | False                          | False                            | Unenriched                     | -                     |                         |
| 849  | IP00041399    | Q13643              | FNH3      | Four and a half LIM domains protein 3                                                       | 31               | 0.474                                                                  | 0.667             | 0.71                              | False                          | False                            | Unenriched                     | -                     |                         |
| 1080 | IP00021918    | Q92817              | DDX39A    | ATP-dependent RNA helicase DDX39A                                                           | 54               | 0.264                                                                  | 0.387             | 0.68                              | False                          | False                            | Unenriched                     | -                     |                         |
| 87   | IP00037639    | Q72794              | KIF77     | Keratin 77                                                                                  | 62               | 2.614                                                                  | 3.876             | 0.67                              | False                          | False                            | Unenriched                     | -                     |                         |
| 1049 | IP00013949    | Q43765              | SGTA      | Small glutamine-rich tetrapeptide repeat-containing protein alpha                           | 34               | 0.324                                                                  | 0.480             | 0.68                              | False                          | False                            | Unenriched                     | -                     |                         |
| 1049 | IP00054451    | P02246              | GNX1L     | Guanine nucleotide-binding protein subunit beta-2-like 1                                    | 35               | 1.256                                                                  | 1.568             | 0.67                              | False                          | False                            | Unenriched                     | -                     |                         |
| 1048 | IP00010717    | Q03426              | MVK       | Mevalonate kinase                                                                           | 42               | 0.168                                                                  | 0.250             | 0.67                              | False                          | False                            | Unenriched                     | -                     |                         |
| 699  | IP00029200    | P19623              | SRM       | Spermidine synthase                                                                         | 34               | 0.646                                                                  | 0.952             | 0.68                              | False                          | False                            | Unenriched                     | -                     |                         |
| 903  | IP00020249    | NUP92               | NUP92     | Nuclear pore large G1-methylated nucleoporin                                                | 86               | 0.193                                                                  | 0.267             | 0.68                              | False                          | False                            | Unenriched                     | -                     |                         |
| 156  | IP00088541    | Q92841              | DDX17     | Isomorph 4 of Probable ATP-dependent RNA helicase DDX17                                     | 80               | 3.354                                                                  | 4.927             | 0.68                              | False                          | False                            | Unenriched                     | -                     |                         |
| 893  | IP00006408    | Q9Y314              | NSOP      | Nitric oxide synthase interacting protein                                                   | 33               | 0.410                                                                  | 0.602             | 0.68                              | False                          | False                            | Unenriched                     | -                     |                         |
| 643  | IP00024689    | P62333              | PSM6B     | Isomorph 2 of Proteasome subunit alpha type-6                                               | 38               | 0.602                                                                  | 0.848             | 0.68                              | False                          | False                            | Unenriched                     | -                     |                         |
| 906  | IP00030469    | P52594              | ADGF1     | Isomorph 2 of Arf-GAP domain and FG repeats-containing protein 1                            | 54               | 0.237                                                                  | 0.348             | 0.68                              | False                          | False                            | Unenriched                     | YES                   |                         |
| 1805 | IP00021638    | P21796              | VDAC1     | Voltage-dependent anion-selective channel protein 1                                         | 31               | 0.098                                                                  | 0.143             | 0.69                              | False                          | False                            | Unenriched                     | -                     |                         |
| 50   | IP00054676    | P69892              | HBE2      | Hemoglobin subunit gamma-2                                                                  | 16               | 21.329                                                                 | 20.825            | 0.69                              | False                          | False                            | Unenriched                     | -                     |                         |
| 279  | IP00024068    | Q9WUM4              | POC5GIP   | Programmed cell death interacting protein 5                                                 | 67               | 0.627                                                                  | 0.903             | 0.69                              | False                          | False                            | Unenriched                     | -                     |                         |
| 622  | IP00059292    | Q56472              | MAGOH8    | Protein magi nashi homolog                                                                  | 17               | 1.343                                                                  | 1.950             | 0.69                              | False                          | False                            | Unenriched                     | -                     |                         |
| 1058 | IP00013810    | Q43709              | WBSK22    | Isomorph 1 of Uncharacterized methyltransferase WBSK22                                      | 32               | 0.225                                                                  | 0.328             | 0.69                              | False                          | False                            | Unenriched                     | -                     |                         |
| 1499 | IP00025584    | Q04049              | WRB2      | WD repeat-containing protein 82                                                             | 130              | 0.049                                                                  | 0.040             | 0.70                              | False                          | False                            | Unenriched                     | -                     |                         |
| 2076 | IP00078313    | Q9H2C5              | METTL11   | Methyltransferase-like protein 14                                                           | 52               | 0.035                                                                  | 0.050             | 0.70                              | False                          | False                            | Unenriched                     | -                     |                         |
| 220  | IP00012340    | Q13242              | SFRS9     | Splicing factor, arginine/serine-rich 9                                                     | 26               | 3.110                                                                  | 3.977             | 0.78                              | False                          | False                            | Unenriched                     | -                     |                         |
| 16   | IP00039678    | P20261              | HNRNP2B1  | Isomorph B1 of Heterogeneous nuclear ribonucleoproteins A2/B1                               | 37               | 13.927                                                                 | 17.446            | 0.79                              | False                          | False                            | Unenriched                     | -                     |                         |
| 947  | IP00020806    | P49721              | PSM82     | Proteasome subunit beta type-2                                                              | 23               | 1.666                                                                  | 2.114             | 0.79                              | False                          | False                            | Unenriched                     | -                     |                         |
| 407  | IP00019321    | P15927              | RPA2      | Isomorph 1 of Replication protein A 32 kDa subunit                                          | 29               | 0.509                                                                  | 0.642             | 0.79                              | False                          | False                            | Unenriched                     | -                     |                         |
| 127  | IP00013420    | Q92825              | FAR5A     | Phenylalanyl-tRNA synthetase alpha chain                                                    | 58               | 0.186                                                                  | 0.240             | 0.77                              | False                          | False                            | Unenriched                     | -                     |                         |
| 1438 | IP00018497    | Q32C08              | TIMM50    | Isomorph 2 of Mitochondrial import inner membrane translocase subunit TIM50                 | 50               | 0.120                                                                  | 0.155             | 0.77                              | False                          | False                            | Unenriched                     | -                     |                         |
| 752  | IP00011770    | Q00483              | NDFU44    | NAH domain containing [ubiquitin] 1 alpha subcomplex subunit 4                              | 9                | 2.184                                                                  | 2.817             | 0.78                              | False                          | False                            | Unenriched                     | -                     |                         |
| 1007 | IP00021167    | Q75507              | TRAF3     | Isomorph 1 of Interferon-inducible double-stranded RNA-dependent protein kinase activator A | 43               | 0.443                                                                  | 0.443             | 0.77                              | False                          | False                            | Unenriched                     | -                     |                         |
| 721  | IP00030512    | Q94979              | SEC13A    | Isomorph 1 of Protein transport protein SEC13A                                              | 122              | 0.138                                                                  | 0.180             | 0.77                              | False                          | False                            | Unenriched                     | -                     |                         |
| 727  | IP00029581    | P23258              | TUBG1     | Tubulin gamma 1 chain                                                                       | 51               | 0.340                                                                  | 0.443             | 0.77                              | False                          | False                            | Unenriched                     | -                     |                         |
| 157  | IP00020881    | P52597              | HNRNP28   | Heterogeneous nuclear ribonucleoprotein F                                                   | 46               | 3.983                                                                  | 5.186             | 0.77                              | False                          | False                            | Unenriched                     | -                     |                         |
| 1588 | IP00029486    | Q99556              | DUSP9     | Dual specificity protein phosphatase 9                                                      | 42               | 0.096                                                                  | 0.125             | 0.77                              | False                          | False                            | Unenriched                     | -                     |                         |
| 1574 | IP00018029    | Q9U088              | BAAP2     | Isomorph 5 of Bran-specific angiogenesis inhibitor 1-associated protein 2                   | 57               | 0.071                                                                  | 0.092             | 0.77                              | False                          | False                            | Unenriched                     | -                     |                         |
| 1811 | IP00029558    | Q02243              | TRAF3B    | NADH dehydrogenase [ubiquinone] 1 subunit C2                                                | 154              | 0.180                                                                  | 0.234             | 0.77                              | False                          | False                            | Unenriched                     | -                     |                         |
| 379  | IP00047145    | P08727              | KRT19     | Keratin, type I cytoskeletal 19                                                             | 44               | 4.441                                                                  | 5.868             | 0.76                              | False                          | False                            | Unenriched                     | -                     |                         |
| 711  | IP00007682    | P38806              | ATF7V1A   | V-type protein ATPase catalytic subunit C                                                   | 68               | 0.289                                                                  | 0.382             | 0.76                              | False                          | False                            | Unenriched                     | -                     |                         |
| 61   | IP00017954    | P35599              | TRAF3     | Isomorph 1 of Polyubiquitin tract-binding protein 3                                         | 76               | 3.458                                                                  | 4.855             | 0.76                              | False                          | False                            | Unenriched                     | -                     |                         |
| 1547 | IP00070581    | Q9R0W9              | FANCD2    | Isomorph 1 of Fancconi anemia group D2 protein                                              | 166              | 0.028                                                                  | 0.037             | 0.76                              | False                          | False                            | Unenriched                     | -                     |                         |
| 792  | IP00021826    | P62140              | PPP1CB    | Serine/threonine-protein phosphatase PP1-beta catalytic subunit                             | 37               | 1.734                                                                  | 2.275             | 0.76                              | False                          | False                            | Unenriched                     | -                     |                         |
| 1564 | IP00000606    | Q02243              | TRAF3     | Isomorph 1 of Polyubiquitin tract-binding protein 3                                         | 76               | 3.458                                                                  | 4.855             | 0.76                              | False                          | False                            | Unenriched                     |                       |                         |

Supplementary Table 1 (cont.) | Hierarchical clustering analysis of proteins identified in active or inactive integrin adhesion complexes.

| #    | IPI Accession | UniProtKB Accession | Gene name      | Protein name                                                        | Relative abundance (mean normalized spectral counts) × 10 <sup>3</sup> |                 |                   | Fold enrichment (active/inactive) |                                | Specific enrichment <sup>†</sup> |                                | Cluster <sup>‡</sup> | Adhesome <sup>§</sup> | Hierarchical clustering |
|------|---------------|---------------------|----------------|---------------------------------------------------------------------|------------------------------------------------------------------------|-----------------|-------------------|-----------------------------------|--------------------------------|----------------------------------|--------------------------------|----------------------|-----------------------|-------------------------|
|      |               |                     |                |                                                                     | MW (kDa)                                                               | Active integrin | Inactive integrin | Active integrin <sup>†</sup>      | Inactive integrin <sup>†</sup> | Active integrin <sup>†</sup>     | Inactive integrin <sup>†</sup> |                      |                       |                         |
| 682  | IP00027996    | P57757              | CORO7          | Isomorf 1 of Coronin 7                                              | 101                                                                    | 0.185           | 0.261             | 0.51                              | False                          | False                            | Unenriched                     | –                    | –                     |                         |
| 1874 | IP00021739    | G01740              | GCYF1          | PEK2 amino acid-rich with GY domain-containing protein 1            | 115                                                                    | 0.018           | 0.024             | 0.15                              | False                          | False                            | Unenriched                     | –                    | –                     |                         |
| 359  | IP00031570    | Q98507              | C1orf57        | Nucleoside-triphosphatase C1orf57                                   | 201                                                                    | 2.157           | 4.230             | 0.51                              | False                          | False                            | Unenriched                     | –                    | –                     |                         |
| 419  | IP00015947    | P25685              | DNAH1B         | DnaJ homology subfamily B member 1                                  | 38                                                                     | 0.942           | 1.849             | 0.51                              | False                          | False                            | Unenriched                     | –                    | –                     |                         |
| 1750 | IP00054711    | P14923              | JUP            | junction plakoglobin                                                | 60                                                                     | 0.086           | 0.168             | 0.51                              | False                          | False                            | Unenriched                     | –                    | –                     |                         |
| 802  | IP00179026    | Q9JUC4              | MCT51          | Isomorf 1 of Malinact 1 cell-amplified sequence 1                   | 21                                                                     | 0.559           | 1.100             | 0.51                              | False                          | False                            | Unenriched                     | –                    | –                     |                         |
| 1801 | IP00012833    | P60510              | PP94C          | Serine/threonine-protein phosphatase 4 catalytic subunit            | 35                                                                     | 0.072           | 0.142             | 0.51                              | False                          | False                            | Unenriched                     | –                    | –                     |                         |
| 208  | IP00020783    | Q9JUC4              | STAT5A         | Signal transducer and activator of transcription 5A                 | 91                                                                     | 1.239           | 0.60              | 0.60                              | False                          | False                            | Unenriched                     | –                    | –                     |                         |
| 479  | IP00001738    | Q99567              | NUP88          | Nuclear pore complex protein Nup88                                  | 84                                                                     | 0.403           | 0.667             | 0.60                              | False                          | False                            | Unenriched                     | –                    | –                     |                         |
| 301  | IP00045631    | Q60341              | KDM1           | Isomorf 1 of Lysine-specific histone demethylase 1                  | 99                                                                     | 0.558           | 0.918             | 0.61                              | False                          | False                            | Unenriched                     | –                    | –                     |                         |
| 254  | IP00079306    | P28071              | PSR85          | Proteasome subunit beta type-5                                      | 28                                                                     | 2.410           | 3.976             | 0.61                              | False                          | False                            | Unenriched                     | –                    | –                     |                         |
| 1020 | IP00024795    | Q8NF91              | SYNE1          | Isomorf 4 of Nesprin-1                                              | 1005                                                                   | 0.002           | 0.003             | 0.67                              | False                          | False                            | Unenriched                     | –                    | –                     |                         |
| 1024 | IP00007935    | Q9H6C4              | PDLIM5         | PDZ and LIM domain protein 5                                        | 64                                                                     | 0.116           | 0.190             | 0.61                              | False                          | False                            | Unenriched                     | –                    | –                     |                         |
| 364  | IP00015651    | P19754              | RCC1           | 5-adenosylmethionine synthetase isomorf type-2                      | 44                                                                     | 0.394           | 0.662             | 0.60                              | False                          | False                            | Unenriched                     | –                    | –                     |                         |
| 705  | IP00007155    | Q9JUK1              | VPS28          | Vacuolar protein sorting-associated protein 28 homolog              | 25                                                                     | 0.662           | 1.108             | 0.60                              | False                          | False                            | Unenriched                     | –                    | –                     |                         |
| 143  | IP00083708    | Q9Y523              | PRKAC          | Isomorf 2 of Protein kinase C- $\delta$ -like 2                     | 317                                                                    | 0.336           | 0.560             | 0.60                              | False                          | False                            | Unenriched                     | –                    | –                     |                         |
| 1405 | IP00081573    | Q11428              | TGDF1          | Isomorf 4 of Treacle protein                                        | 156                                                                    | 0.003           | 0.009             | 0.60                              | False                          | False                            | Unenriched                     | –                    | –                     |                         |
| 18   | IP00017617    | P17844              | DDX5           | Probable ATP-dependent RNA helicase DDX5                            | 69                                                                     | 5.706           | 9.123             | 0.63                              | False                          | False                            | Unenriched                     | –                    | –                     |                         |
| 633  | IP00080449    | Q9JUN5              | FP1L1          | Isomorf 3 of Tre-1-like 3                                           | 58                                                                     | 0.420           | 0.675             | 0.62                              | False                          | False                            | Unenriched                     | –                    | –                     |                         |
| 32   | IP00017963    | P08779              | KRT16          | Keratin, type I cytoskeletal 16                                     | 53                                                                     | 6.723           | 10.935            | 0.61                              | False                          | False                            | Unenriched                     | –                    | –                     |                         |
| 188  | IP00030725    | P02538              | KRT6A          | Keratin, type II cytoskeletal 6A                                    | 60                                                                     | 4.422           | 7.197             | 0.61                              | False                          | False                            | Unenriched                     | –                    | –                     |                         |
| 975  | IP00128505    | Q8RWR3              | GTSE1          | Gamete-specific factor 1                                            | 19                                                                     | 0.602           | 0.982             | 0.61                              | False                          | False                            | Unenriched                     | –                    | –                     |                         |
| 718  | IP00011257    | Q84917              | ACR3           | Isomorf 1 of Cell division cycle and apoptosis regulator protein 1  | 133                                                                    | 0.084           | 0.136             | 0.62                              | False                          | False                            | Unenriched                     | –                    | –                     |                         |
| 1303 | IP00033030    | P16186              | ADRM1          | Proteasomal ubiquitin receptor ADRM1                                | 42                                                                     | 0.156           | 0.253             | 0.62                              | False                          | False                            | Unenriched                     | –                    | –                     |                         |
| 375  | IP00041007    | Q7Z2W4              | ZC3HAV1        | Isomorf 1 of Zinc finger CCHC-type antiviral protein 1              | 101                                                                    | 0.404           | 0.652             | 0.62                              | False                          | False                            | Unenriched                     | –                    | –                     |                         |
| 1109 | IP00010369    | Q9C623              | WRHG1          | WD repeat-containing protein 61                                     | 302                                                                    | 0.391           | 0.62              | 0.62                              | False                          | False                            | Unenriched                     | –                    | –                     |                         |
| 442  | IP00021742    | Q8W222              | HCG_204502     | ANHD1-EP48P3 protein                                                | 277                                                                    | 0.347           | 0.551             | 0.63                              | False                          | False                            | Unenriched                     | –                    | –                     |                         |
| 734  | IP000165361   | Q8H8T7              | DGJUN1D5       | DCN1-like protein 5                                                 | 28                                                                     | 0.576           | 0.914             | 0.63                              | False                          | False                            | Unenriched                     | –                    | –                     |                         |
| 874  | IP00007321    | Q75620              | LPLA1          | Acyl-protein thioesterase 1                                         | 49                                                                     | 0.586           | 0.929             | 0.63                              | False                          | False                            | Unenriched                     | –                    | –                     |                         |
| 716  | IP00007611    | P48047              | ATPSO          | ATP-synthase subunit O, mitochondrial                               | 23                                                                     | 0.833           | 1.312             | 0.63                              | False                          | False                            | Unenriched                     | –                    | –                     |                         |
| 181  | IP00079518    | P33991              | MCM4           | DNA replication licensing factor, MCM4                              | 93                                                                     | 0.851           | 1.335             | 0.64                              | False                          | False                            | Unenriched                     | –                    | –                     |                         |
| 1513 | IP00001605    | Q9JUK4              | NTR1           | NTF-2-related export protein 1                                      | 60                                                                     | 0.315           | 0.484             | 0.64                              | False                          | False                            | Unenriched                     | –                    | –                     |                         |
| 165  | IP00007188    | P05141              | SLC25A5        | ADP/ATP translocase 2                                               | 33                                                                     | 2.981           | 4.610             | 0.65                              | False                          | False                            | Unenriched                     | –                    | –                     |                         |
| 1225 | IP000165171   | Q9Q6F8              | DGCR14         | Protein DGCR14                                                      | 53                                                                     | 0.128           | 0.198             | 0.65                              | False                          | False                            | Unenriched                     | –                    | –                     |                         |
| 178  | IP00021638    | Q97972              | PCALD1         | Isomorf 2 of Phosphatidylinositol-binding clathrin assembly protein | 62                                                                     | 1.414           | 2.201             | 0.65                              | False                          | False                            | Unenriched                     | –                    | –                     |                         |
| 1586 | IP00025585    | Q9JUF8              | CGBP1          | CGG triplet repeat-binding protein 1                                | 19                                                                     | 0.155           | 0.242             | 0.64                              | False                          | False                            | Unenriched                     | –                    | –                     |                         |
| 714  | IP00014550    | Q8N188              | DNM2           | dynamine 2 isomorf 2                                                | 98                                                                     | 0.164           | 0.256             | 0.64                              | False                          | False                            | Unenriched                     | –                    | YES                   |                         |
| 1183 | IP00007811    | P13864              | CDK6           | Cyclin dependent protein kinase 4                                   | 64                                                                     | 1.008           | 1.574             | 0.64                              | False                          | False                            | Unenriched                     | –                    | –                     |                         |
| 104  | IP00000873    | P26640              | VARS           | Valyl-tRNA synthetase                                               | 140                                                                    | 0.982           | 1.473             | 0.67                              | False                          | False                            | Unenriched                     | –                    | –                     |                         |
| 915  | IP00009253    | P54920              | NAPA           | Alpha-synuclein NTF attachment protein                              | 33                                                                     | 0.456           | 0.682             | 0.67                              | False                          | False                            | Unenriched                     | –                    | –                     |                         |
| 41   | IP00025512    | Q9J979              | HSP90A         | Heat shock protein beta-1                                           | 23                                                                     | 10.911          | 16.447            | 0.65                              | False                          | False                            | Unenriched                     | –                    | YES                   |                         |
| 531  | IP00082189    | P22061              | PCMT1          | Isomorf 2 of Protein-L-isospartate(D-aspartate) O-methyltransferase | 30                                                                     | 1.073           | 1.617             | 0.66                              | False                          | False                            | Unenriched                     | –                    | –                     |                         |
| 1375 | IP00039813    | Q6ZK17              | LNH2B8         | Isomorf 1 of Protein lin-28 homolog B                               | 27                                                                     | 0.149           | 0.225             | 0.66                              | False                          | False                            | Unenriched                     | –                    | –                     |                         |
| 958  | IP00002373    | Q9JUK3              | NDR1           | RNA-binding protein NDR1                                            | 66                                                                     | 0.250           | 0.377             | 0.66                              | False                          | False                            | Unenriched                     | –                    | –                     |                         |
| 790  | IP00010302    | Q99419              | CNN3           | Calponin-3                                                          | 34                                                                     | 0.515           | 0.778             | 0.66                              | False                          | False                            | Unenriched                     | –                    | –                     |                         |
| 345  | IP00002460    | P20073              | ANXA7          | Isomorf 1 of Annexin A7                                             | 53                                                                     | 1.031           | 1.573             | 0.66                              | False                          | False                            | Unenriched                     | –                    | –                     |                         |
| 1353 | IP00030309    | P54254              | POLR2H         | DNA-directed RNA polymerases I, II, and III subunit RPABC3          | 17                                                                     | 0.322           | 0.492             | 0.65                              | False                          | False                            | Unenriched                     | –                    | –                     |                         |
| 311  | IP00019516    | Q9JUK4              | RPLP0          | Ribosome-associated phospholipase 1                                 | 49                                                                     | 0.586           | 0.929             | 0.65                              | False                          | False                            | Unenriched                     | –                    | –                     |                         |
| 1351 | IP00081600    | Q14475              | HBE1           | Epiplon-globin (Fragment)                                           | 4                                                                      | 13.072          | 19.914            | 0.66                              | False                          | False                            | Unenriched                     | –                    | –                     |                         |
| 1277 | IP00018249    | Q60726              | CTNND1         | Isomorf 1A8 of Catenin-1 delta-1                                    | 107                                                                    | 0.035           | 0.053             | 0.66                              | False                          | False                            | Unenriched                     | –                    | –                     |                         |
| 1427 | IP00011297    | Q95573              | ACSL3          | Long-chain-fatty-acyl-CoA ligase 3                                  | 64                                                                     | 0.084           | 0.136             | 0.66                              | False                          | False                            | Unenriched                     | –                    | –                     |                         |
| 1921 | IP00080795    | Q8RWF8              | UPF040 protein | UPF040 protein                                                      | 9                                                                      | 0.366           | 0.510             | 0.66                              | False                          | False                            | Unenriched                     | –                    | –                     |                         |
| 798  | IP00029130    | Q14677              | CLINT1         | Clathrin interactor 1                                               | 70                                                                     | 0.258           | 0.396             | 0.65                              | False                          | False                            | Unenriched                     | –                    | –                     |                         |
| 1227 | IP00020895    | P49757              | NLME1          | Isomorf 1 of Protein numb homolog                                   | 65                                                                     | 0.128           | 0.198             | 0.65                              | False                          | False                            | Unenriched                     | –                    | –                     |                         |
| 1161 | IP00005040    | P11310              | ACADM          | Medium-chain specific acyl-CoA dehydrogenase, mitochondrial         | 47                                                                     | 0.216           | 0.331             | 0.65                              | False                          | False                            | Unenriched                     | –                    | –                     |                         |
| 1940 | IP00055639    | Q9H615              | SMG1           | 411 kDa protein                                                     | 411                                                                    | 0.006           | 0.009             | 0.67                              | False                          | False                            | Unenriched                     | –                    | –                     |                         |
| 1421 | IP00002160    | P09397              | HNRK1          | Isomorf 1 of Porphobilinogen deaminase                              | 39                                                                     | 0.111           | 0.170             | 0.65                              | False                          | False                            | Unenriched                     | –                    | –                     |                         |
| 1503 | IP00001960    | Q9Y696              | CLIC4          | Chloride intracellular channel family 4                             | 29                                                                     | 0.161           | 0.248             | 0.65                              | False                          | False                            | Unenriched                     | –                    | –                     |                         |
| 1906 | IP00034803    | Q6G6V3              | C2orf79        | Uncharacterized protein C2orf79                                     | 16                                                                     | 0.113           | 0.173             | 0.65                              | False                          | False                            | Unenriched                     | –                    | –                     |                         |
| 1632 | IP00045211    | Q9H6A6              | WRHG2          | WD repeat-containing protein 62                                     | 85                                                                     | 0.390           | 0.62              | 0.65                              | False                          | False                            | Unenriched                     | –                    | –                     |                         |
| 1637 | IP00000005    | P01111              | NRAS           | GTPase NRAS                                                         | 21                                                                     | 0.189           | 0.289             | 0.65                              | False                          | False                            | Unenriched                     | –                    | –                     |                         |
| 1    | IP00021440    | P63261              | ACTG1          | Actin, cytoplasmic 1                                                | 42                                                                     | 49.453          | 107.033           | 0.46                              | False                          | False                            | Inactive                       | YES                  | –                     |                         |
| 112  | IP00013559    | P55227              | KRT9           | Keratin, type I cytoskeletal 9                                      | 62                                                                     | 8.198           | 12.711            | 0.64                              | False                          | False                            | Inactive                       | –                    | –                     |                         |
| 358  | IP00029078    | P19013              | KRT4           | keratin 4                                                           | 64                                                                     | 0.599           | 1.305             | 0.46                              | False                          | False                            | Inactive                       | –                    | –                     |                         |
| 521  | IP00023530    | Q00335              | CKD5           | Cell division protein kinase 5                                      | 33                                                                     | 1.353           | 2.957             | 0.46                              | False                          | False                            | Inactive                       | –                    | –                     |                         |
| 41   | IP00014688    | Q14368              | BUB3           | Isomorf 1 of Mitotic checkpoint protein BUB3                        | 37                                                                     | 4.063           | 6.950             | 0.45                              | False                          | False                            | Inactive                       | –                    | –                     |                         |
| 196  | IP00021428    | P68133              | ACTA1          | Actin, alpha skeletal muscle                                        | 42                                                                     | 32.231          | 70.888            | 0.45                              | False                          | False                            | Inactive                       | YES*                 | –                     |                         |
| 73   | IP00014856    | Q14157              | UBAP2L         | Isomorf 1 of Ubiquitin-associated protein 2-like                    | 115                                                                    | 1.319           | 2.895             | 0.46                              | False                          | False                            | Inactive                       | –                    | –                     |                         |
| 66   | IP00025512    | Q9J979              | HSP90A         | Heat shock protein beta-1                                           | 23                                                                     | 10.911          | 16.447            | 0.46                              | False                          | False                            | Inactive                       | –                    | –                     |                         |
| 933  | IP00021749    | Q92540              | SMG7           | Isomorf 1 of Protein SMG7                                           | 127                                                                    | 0.091           | 0.200             | 0.46                              | False                          | False                            | Inactive                       | –                    | –                     |                         |
| 299  | IP00029048    | Q14166              | TLIL2          | Tubulin-tyrosine ligase-like protein 2                              | 74                                                                     | 0.516           | 1.139             | 0.45                              | False                          | False                            | Inactive                       | –                    | –                     |                         |
| 13   | IP00021204    | P55998              | KRT2           | Keratin, type I cytoskeletal 2 epidermal                            | 66                                                                     | 9.840           | 22.999            | 0.45                              | False                          | False                            | Inactive                       | –                    | –                     |                         |
| 221  | IP00018693    | Q97411              | ANR1           | Adrenic phospholipid transferase                                    | 66                                                                     | 0.946           | 1.236             | 0.45                              | False                          | False                            | Inactive                       | –                    | –                     |                         |
| 674  | IP00041706    | Q9JUF5              | TUBB6          | 46 kDa protein                                                      | 46                                                                     | 12.385          | 27.688            | 0.45                              | False                          | False                            | Inactive                       | –                    | –                     |                         |
| 235  | IP00021298    | P04350              | TUBB4          | Tubulin beta-4 chain                                                | 50                                                                     | 21.541          | 48.079            | 0.45                              | False                          | False                            | Inactive                       | –                    | –                     |                         |
| 1217 | IP00021692    | Q9N856              | MRN1           | Isomorf 1 of Mre114-like protein 1                                  | 45                                                                     | 6.220           | 11.395            | 0.45                              | False                          | False                            | Inactive                       | –                    | –                     |                         |
| 1115 | IP00002922    | Q98207              | TBL1X1         | F-box-like/WD repeat-containing protein TBL1X1                      | 56                                                                     | 0.132           | 0.284             | 0.45                              | False                          | False                            | Inactive                       | –                    | –                     |                         |
| 1448 | IP00009480    | Q96627              | CDP58          | CDP58 signalosome subunit protein                                   | 23                                                                     | 0.172           | 0.383             | 0.45                              | False                          | False                            | Inactive                       | –                    | –                     |                         |
| 723  | IP00086469    | Q9JUF5              | TUBB6          | Tubulin beta-6 chain                                                | 47                                                                     | 12.272          | 27.810            | 0.44                              | False                          | False                            | Inactive                       | –                    | –                     |                         |
| 862  | IP00027485    | P06730              | EF4E           | Eukaryotic translation initiation factor 4E                         | 25                                                                     | 0.432           | 0.977             | 0.44                              | False                          | False                            | Inactive                       | –                    | –                     |                         |
| 3    | IP00038236    | P52272              | HNRPMP         | Isomorf 2 of Heterogeneous nuclear ribonucleoprotein M              | 74                                                                     | 17.816          | 37.612            | 0.47                              | False                          | False                            | Inactive                       | –                    | –                     |                         |
| 15   | IP00029645    | P63010              | EF3A1          | Elongation factor 3-alpha 1                                         | 50                                                                     | 18.176          | 38.404            | 0.47                              | False                          | False                            | Inactive                       | –                    | –                     |                         |
| 409  | IP00010118    | Q96P08              | QKI            | Isomorf 4 of Protein quaking                                        | 40                                                                     | 0.940           | 1.987             | 0.47                              | False                          | False                            | Inactive                       | –                    | –                     |                         |
| 319  | IP00037397    | P52948              | NUP98          | Isomorf 5 of Nuclear pore complex protein Nup88-Nup96               | 196                                                                    | 0.229           | 0.482             | 0.48                              | False                          | False                            | Inactive                       | –                    | –                     |                         |
| 7    | IP00079277    | Q98863              | TUBA1B         | Tubulin alpha-1B chain                                              | 47                                                                     | 17.980          | 37.664            | 0.47                              | False                          | False                            | Inactive                       | –                    | YES                   |                         |
| 1444 | IP00047860    | Q51619              | UBAP2          | Ubiquitin-associated protein 2 (UBAP2), transcript variant 1        | 73                                                                     | 0.235           | 0.494             | 0.48                              | False                          | False                            | Inactive                       | –                    | –                     |                         |
| 992  | IP00047307    | P54619              | PRKAG1         | 5'-AMP-ACTIVATED PROTEIN KINASE, GAMMA-1, SUBUNIT 1                 | 39                                                                     | 0.264           | 0.557             | 0.47                              | False                          | False                            | Inactive                       | –                    | YES                   |                         |
| 1418 | IP00010122    | Q9JUK3              | NDR1           | Isomorf 1 of Nucleoside diphosphate                                 | 66                                                                     | 0.200           | 0.370             | 0.47                              | False                          | False                            | Inactive                       | –                    | –                     |                         |
| 1129 | IP00037541    | Q96464              | FUBP1          | Isomorf 1 of Far upstream element-binding protein 1                 | 68                                                                     | 0.777           | 1.631             | 0.48                              | False                          | False                            | Inactive                       | –                    | –                     |                         |
| 1228 | IP00016513    | P63026              | RAB10          | Ras-related protein Rab-10                                          | 23                                                                     | 0.870           | 1.825             | 0.48                              | False                          | False                            | Inactive                       | –                    | –                     |                         |
| 734  | IP00020581    | Q95811              | ENHS1          | Ewing sarcoma breakpoint region 1 isomorf 1                         | 124                                                                    | 0.509           | 0.928             | 0.48                              | False                          | False                            | Inactive                       | –                    | –                     |                         |
| 1086 | IP00005948    | Q9H620              | MR1            | Isomorf 1 of Methylthioesterase-1-phosphate isomerase               | 39                                                                     | 0.185           | 0.397             | 0.47                              | False                          | False                            | Inactive                       | –                    | –                     |                         |
| 130  | IP00037261    | Q6824               | FUBP3          | Isomorf 1 of Far upstream element-binding protein 3                 | 62                                                                     |                 |                   |                                   |                                |                                  |                                |                      |                       |                         |



Supplementary Table 1 (cont.) | Hierarchical clustering analysis of proteins identified in active or inactive integrin adhesion complexes.

| #    | IP1 Accession | UniProtKB Accession | Gene name | Protein name                                                                                         | Relative abundance (mean normalized spectral count) x10 <sup>3</sup> |                 | Fold enrichment (active/inactive) |                 | Specific enrichment <sup>†</sup> |                      | Adhesome <sup>‡</sup> | Hierarchical clustering |
|------|---------------|---------------------|-----------|------------------------------------------------------------------------------------------------------|----------------------------------------------------------------------|-----------------|-----------------------------------|-----------------|----------------------------------|----------------------|-----------------------|-------------------------|
|      |               |                     |           |                                                                                                      | Protein MW (kDa)                                                     | Active integrin | Inactive integrin                 | Active integrin | Inactive integrin                | Cluster <sup>§</sup> |                       |                         |
| 847  | IP00033130    | Q9JBU0              | SAE1      | SUMO-activating enzyme subunit 1                                                                     | 38                                                                   | 0.262           | 0.683                             | 0.38            | False                            | False                | Inactive              |                         |
| 1493 | IP00375622    | Q78920              | CTF84     | 1 of 2 Cytosolic polyubiquitin element-binding protein 4                                             | 30                                                                   | 0.044           | 0.115                             | 0.38            | False                            | False                | Inactive              |                         |
| 155  | IP00165230    | DZAF1               | DZAF1     | Isomorph of DAZ-associated protein 1                                                                 | 41                                                                   | 1.783           | 4.813                             | 0.37            | False                            | False                | Inactive              |                         |
| 22   | IP00013877    | P31942              | HNRNP33   | Isomorph of Heterogeneous nuclear ribonucleoprotein H3                                               | 37                                                                   | 7.551           | 20.190                            | 0.37            | False                            | False                | Inactive              |                         |
| 1112 | IP00025084    | P09522              | CTPK1     | Catalin small subunit 1                                                                              | 67                                                                   | 0.255           | 0.118                             | 0.37            | False                            | False                | Inactive              | YES*                    |
| 29   | IP00026592    | Q9Y446              | PKP3      | Plakophilin-3                                                                                        | 87                                                                   | 0.465           | 1.249                             | 0.37            | False                            | False                | Inactive              |                         |
| 1059 | IP00078934    | P14923              | JUP       | Junction plakoglobin                                                                                 | 63                                                                   | 0.752           | 2.015                             | 0.37            | False                            | True                 | Inactive              |                         |
| 510  | IP0029242     | P17812              | CTPS      | CTP synthase 1                                                                                       | 69                                                                   | 0.325           | 0.885                             | 0.37            | False                            | False                | Inactive              |                         |
| 72   | IP00025815    | Q13148              | TARDP     | TDPA3                                                                                                | 45                                                                   | 2.792           | 7.591                             | 0.37            | False                            | False                | Inactive              |                         |
| 949  | IP00328938    | Q9BWD0              | RNF138    | Isomorph of E3 ubiquitin-protein ligase RNF138                                                       | 28                                                                   | 0.357           | 0.972                             | 0.37            | False                            | False                | Inactive              |                         |
| 145  | IP00564481    | Q9N056              | MIRN1     | Putative uncharacterized protein MIRN1                                                               | 36                                                                   | 1.986           | 5.400                             | 0.37            | False                            | False                | Inactive              |                         |
| 1008 | IP00022597    | P61081              | UBE2M     | NEDD8-conjugating enzyme Ubc2                                                                        | 21                                                                   | 0.384           | 1.051                             | 0.37            | False                            | False                | Inactive              |                         |
| 1911 | IP00024097    | Q9JUG8              | TES       | Isomorph of 1 of Testin                                                                              | 48                                                                   | 0.021           | 0.058                             | 0.36            | False                            | False                | Inactive              | YES                     |
| 217  | IP00021700    | P48634              | BAT2      | Isomorph of 1 of Large proline-rich protein BAT2                                                     | 229                                                                  | 0.223           | 0.516                             | 0.36            | False                            | False                | Inactive              |                         |
| 719  | IP00016008    | P11413              | GPDP      | Isomorph Long of Glucosa-6-phosphate 1-dehydrogenase                                                 | 64                                                                   | 0.169           | 0.466                             | 0.36            | False                            | False                | Inactive              |                         |
| 1721 | IP00022079    | Q9Y609              | NCOA3     | Isomorph of 2 of Nuclear coactivator coactivator 3                                                   | 154                                                                  | 0.007           | 0.019                             | 0.37            | False                            | False                | Inactive              |                         |
| 1627 | IP00024530    | P36404              | ARL2      | ADP-ribosylation factor-like protein 2                                                               | 51                                                                   | 0.120           | 0.330                             | 0.36            | False                            | False                | Inactive              |                         |
| 366  | IP00004273    | P49756              | RBM25     | Isomorph of 1 of RNA-binding protein 25                                                              | 100                                                                  | 0.279           | 0.781                             | 0.36            | False                            | False                | Inactive              |                         |
| 195  | IP00554777    | P08243              | ASNS      | Asparagine synthetase [glutamine-hydrolyzing]                                                        | 64                                                                   | 0.901           | 2.515                             | 0.36            | False                            | False                | Inactive              |                         |
| 1003 | IP00309578    | Q43488              | ARX7A2    | Altaxon B1 aldolase reductase member 2                                                               | 40                                                                   | 0.241           | 0.673                             | 0.36            | False                            | False                | Inactive              |                         |
| 852  | IP00024530    | Q89Y56              | HLEF2     | Isomorph of 1 of HEAT repeat-containing protein 2                                                    | 49                                                                   | 0.104           | 0.291                             | 0.36            | False                            | False                | Inactive              |                         |
| 1557 | IP00304932    | Q43159              | R8R8      | Ribosomal RNA-processing protein 8                                                                   | 51                                                                   | 0.042           | 0.119                             | 0.35            | False                            | False                | Inactive              |                         |
| 382  | IP00078906    | P38838              | LAP3      | Isomorph of 2 of Cytosol aminopeptidase                                                              | 53                                                                   | 0.399           | 1.081                             | 0.21            | False                            | False                | Inactive              |                         |
| 576  | IP00021175    | Q90626              | Sectm     | Sectm                                                                                                | 22                                                                   | 0.609           | 2.828                             | 0.22            | False                            | False                | Inactive              |                         |
| 700  | IP00003923    | P11772              | UMPS      | Isomorph of 1 of Uridine 5'-monophosphate synthase                                                   | 55                                                                   | 1.074           | 0.816                             | 0.21            | False                            | False                | Inactive              |                         |
| 44   | IP00036064    | Q86848              | ITGAS     | Integrin alpha 5                                                                                     | 112                                                                  | 1.082           | 5.174                             | 0.21            | False                            | True                 | Inactive              | YES                     |
| 1153 | IP00124805    | Q94788              | ALDH1A2   | Isomorph of 1 of Retinal dehydrogenase 2                                                             | 52                                                                   | 0.066           | 0.117                             | 0.21            | False                            | False                | Inactive              |                         |
| 570  | IP00041280    | Q86K55              | CARM1     | Isomorph of 1 of Histone-arginine methyltransferase CARM1                                            | 63                                                                   | 0.194           | 0.973                             | 0.20            | False                            | False                | Inactive              |                         |
| 1113 | IP00018627    | Q6GZ21              | NAT13     | Isomorph of 1 of N-acetyltransferase 13                                                              | 19                                                                   | 0.231           | 1.154                             | 0.20            | False                            | False                | Inactive              |                         |
| 1570 | IP00078407    | Q86947              | DISS2     | Isomorph of 1 of RNA-dihydroxyisopentyl synthase 3-like                                              | 72                                                                   | 0.040           | 0.098                             | 0.20            | False                            | False                | Inactive              |                         |
| 38   | IP00021756    | P05556              | ITGB1     | Isomorph Beta-1 of Integrin beta 1                                                                   | 88                                                                   | 1.549           | 7.572                             | 0.20            | False                            | False                | Inactive              | YES                     |
| 1716 | IP00068145    | Q8P956              | C7orf27   | Isomorph of 1 of HEAT repeat-containing protein C7orf27                                              | 88                                                                   | 0.008           | 0.040                             | 0.20            | False                            | False                | Inactive              |                         |
| 1153 | IP00028791    | P18732              | CAQ1      | Probable cytosolic iron-sulfur protein assembly protein CAQ1                                         | 88                                                                   | 0.223           | 0.233                             | 0.20            | False                            | False                | Inactive              |                         |
| 1549 | IP00002324    | Q9N219              | MAT2B     | Isomorph of 1 of Methionine adenosyltransferase 2 subunit beta                                       | 38                                                                   | 0.047           | 0.233                             | 0.20            | False                            | False                | Inactive              |                         |
| 967  | IP00022822    | P39060              | COL1A1    | Isomorph of 2 of Collagen alpha-1(XVII) chain                                                        | 154                                                                  | 0.035           | 0.173                             | 0.20            | False                            | False                | Inactive              |                         |
| 2961 | IP00012460    | P19024              | LGTN      | Isomorph of 1 of Lignin                                                                              | 65                                                                   | 0.016           | 0.076                             | 0.20            | False                            | False                | Inactive              |                         |
| 326  | IP00000897    | P42694              | HEL2      | HEL2 protein                                                                                         | 219                                                                  | 0.100           | 0.532                             | 0.19            | False                            | True                 | Inactive              |                         |
| 555  | IP00021593    | Q14687              | GSE1      | Isomorph of 1 of Genetic suppressor element 1                                                        | 136                                                                  | 0.086           | 0.455                             | 0.19            | False                            | False                | Inactive              |                         |
| 1215 | IP00013999    | P15976              | GATL3     | Isomorph of 1 of Tyrosyl transferase factor                                                          | 43                                                                   | 0.083           | 0.443                             | 0.19            | False                            | False                | Inactive              |                         |
| 1352 | IP00010080    | Q95747              | OXSR1     | Serine/threonine-protein kinase OXSR1                                                                | 58                                                                   | 0.043           | 0.238                             | 0.18            | False                            | False                | Inactive              |                         |
| 1760 | IP00030096    | Q15286              | RAB35     | Ras-related protein Rab-35                                                                           | 23                                                                   | 0.219           | 1.201                             | 0.18            | False                            | False                | Inactive              |                         |
| 740  | IP00022103    | Q18621              | DNCE2     | Segment polarity protein-disc-large homolog DNL-2                                                    | 79                                                                   | 0.028           | 0.454                             | 0.18            | False                            | False                | Inactive              |                         |
| 1542 | IP00084996    | Q9C066              | DNAH6     | Isomorph of 1 of Dyx19c1 heavy chain 6, axonemal                                                     | 476                                                                  | 0.002           | 0.011                             | 0.18            | False                            | False                | Inactive              |                         |
| 415  | IP000641384   | Q15027              | SEC16A    | SEC16 homolog A                                                                                      | 252                                                                  | 0.077           | 0.304                             | 0.25            | False                            | False                | Inactive              |                         |
| 547  | IP00028935    | P18466              | KDM3B     | Isomorph of 1 of Lysine-specific demethylase 3B                                                      | 150                                                                  | 0.040           | 0.243                             | 0.25            | False                            | False                | Inactive              |                         |
| 648  | IP00048871    | Q9Y530              | UHRF10    | Uncharacterized protein Gorf130                                                                      | 17                                                                   | 0.899           | 3.616                             | 0.25            | False                            | False                | Inactive              |                         |
| 56   | IP00005780    | Q15294              | OGT       | Isomorph of 3 of UDP-N-acetylglucosamine-6-phosphate N-acetylglucosaminyltransferase 110 kDa subunit | 117                                                                  | 0.100           | 0.382                             | 0.26            | False                            | False                | Inactive              |                         |
| 697  | IP00013933    | P15924              | DSP       | Isomorph DPH of Desmoplamin                                                                          | 332                                                                  | 0.027           | 0.105                             | 0.26            | False                            | False                | Inactive              |                         |
| 1507 | IP00033568    | Q9H747              | PTGE2     | Prostaglandin G/H synthase 2                                                                         | 42                                                                   | 0.069           | 0.263                             | 0.26            | False                            | False                | Inactive              |                         |
| 1532 | IP00024802    | Q14981              | BTAF1     | TATA-binding protein-associated factor 172                                                           | 207                                                                  | 0.010           | 0.037                             | 0.27            | False                            | False                | Inactive              |                         |
| 817  | IP00049389    | Q86V86              | METTL11A  | Protein of unknown function DUF358, methyltransferase-like family protein                            | 25                                                                   | 0.314           | 1.211                             | 0.26            | False                            | False                | Inactive              |                         |
| 484  | IP00024033    | Q9H254              | PTK23     | Tyrosine-protein phosphatase non-receptor-type 23                                                    | 165                                                                  | 0.018           | 0.031                             | 0.26            | False                            | False                | Inactive              |                         |
| 1047 | IP00020944    | P37268              | F0F17     | Squalene synthetase                                                                                  | 48                                                                   | 0.122           | 0.474                             | 0.26            | False                            | False                | Inactive              |                         |
| 1360 | IP00008771    | Q10314              | HHEX      | Hematopoietically-expressed homeobox protein HHEX                                                    | 30                                                                   | 0.084           | 0.328                             | 0.26            | False                            | False                | Inactive              |                         |
| 1590 | IP00010706    | Q9H456              | RIIAP2    | Interferon alpha response factor 2                                                                   | 15                                                                   | 0.284           | 1.016                             | 0.26            | False                            | False                | Inactive              |                         |
| 305  | IP00022977    | P12277              | CKB       | Creatine kinase B                                                                                    | 43                                                                   | 0.605           | 2.756                             | 0.22            | False                            | False                | Inactive              |                         |
| 245  | IP00095406    | Q9NT26              | RBM12     | Putative uncharacterized protein DKF2667H197 (Fragment)                                              | 100                                                                  | 0.293           | 1.327                             | 0.22            | False                            | False                | Inactive              |                         |
| 604  | IP00036218    | Q8P947              | SGR2      | SCR-like protein 2                                                                                   | 102                                                                  | 0.462           | 1.622                             | 0.22            | False                            | False                | Inactive              |                         |
| 1390 | IP000878754   | Q86U11              | PRPF39    | Isomorph of 1 of Pre-mRNA-processing factor 39                                                       | 78                                                                   | 0.009           | 0.042                             | 0.21            | False                            | False                | Inactive              |                         |
| 466  | IP000478231   | P61586              | RHOA      | Transforming protein RhoA                                                                            | 22                                                                   | 0.779           | 3.392                             | 0.23            | False                            | False                | Inactive              |                         |
| 766  | IP00022184    | Q18732              | CAQ1      | Isomorph of 3 of Pumilio homolog 2                                                                   | 88                                                                   | 0.221           | 0.962                             | 0.23            | False                            | False                | Inactive              |                         |
| 884  | IP00021843    | Q9R063              | TUBA1C    | Tubulin alpha-1C chain                                                                               | 50                                                                   | 7.557           | 32.785                            | 0.23            | False                            | True                 | Inactive              | YES*                    |
| 672  | IP000395347   | Q171C2              | LARP4     | Isomorph of 1 of La-related protein 4                                                                | 81                                                                   | 0.149           | 0.659                             | 0.23            | False                            | False                | Inactive              |                         |
| 878  | IP00020454    | P12707              | DCX       | Developmental protein DCX                                                                            | 33                                                                   | 0.283           | 1.060                             | 0.23            | False                            | False                | Inactive              |                         |
| 511  | IP00016669    | Q15382              | RHEB      | GTP-binding protein Rheb                                                                             | 20                                                                   | 0.677           | 2.968                             | 0.23            | False                            | False                | Inactive              |                         |
| 1928 | IP00024281    | Q14893              | SFP1      | Isomorph of 1 of Survival of motor neuron protein-interacting protein 1                              | 32                                                                   | 0.031           | 0.138                             | 0.22            | False                            | False                | Inactive              |                         |
| 941  | IP00023505    | Q15639              | MKP13     | Isomorph of 1 of Mitogen-activated protein kinase phosphatase 13                                     | 49                                                                   | 0.408           | 1.493                             | 0.23            | False                            | False                | Inactive              |                         |
| 1120 | IP00002857    | Q15639              | MKP14     | Isomorph CSBP2 of Mitogen-activated protein kinase 14                                                | 41                                                                   | 0.105           | 0.472                             | 0.22            | False                            | False                | Inactive              |                         |
| 1180 | IP000789069   | Q9NVU2              | ARL8B     | ADP-ribosylation factor-like protein 8B                                                              | 21                                                                   | 0.192           | 0.812                             | 0.24            | False                            | False                | Inactive              |                         |
| 3751 | IP00023846    | Q86V95              | FAM83A    | Isomorph of 1 of Protein FAM83A                                                                      | 47                                                                   | 0.023           | 0.103                             | 0.24            | False                            | False                | Inactive              |                         |
| 1327 | IP00029035    | Q96444              | TP53RK    | TP53-regulating kinase                                                                               | 28                                                                   | 0.116           | 0.492                             | 0.24            | False                            | False                | Inactive              |                         |
| 1774 | IP00027838    | Q98024              | RBM4B     | RNA-binding protein 4B                                                                               | 40                                                                   | 0.529           | 2.244                             | 0.24            | False                            | False                | Inactive              |                         |
| 1664 | IP00012122    | P41240              | CEK       | Tyrosine-protein kinase CEK                                                                          | 51                                                                   | 0.040           | 0.162                             | 0.25            | False                            | False                | Inactive              | YES                     |
| 2080 | IP00013929    | Q15923              | TCF3      | Isomorph E12 of Transcription factor E2-alpha                                                        | 68                                                                   | 0.015           | 0.061                             | 0.25            | False                            | False                | Inactive              |                         |
| 435  | IP00015046    | Q9N604              | RBM22     | Isomorph of 1 of Pre-mRNA-splicing factor RBM22                                                      | 47                                                                   | 0.502           | 1.492                             | 0.34            | False                            | False                | Inactive              |                         |
| 842  | IP00017596    | Q86N64              | TTCC      | Tetratricopeptide repeat protein 5C                                                                  | 20                                                                   | 0.385           | 1.143                             | 0.34            | False                            | False                | Inactive              |                         |
| 212  | IP00033371    | P17801              | PTL       | Isomorph of 1 of 6-phosphotransferase, beta type                                                     | 42                                                                   | 0.834           | 3.484                             | 0.34            | False                            | False                | Inactive              |                         |
| 914  | IP000745793   | P14635              | CNB1      | G2/mitotic-specific cyclin B1                                                                        | 48                                                                   | 0.152           | 0.450                             | 0.34            | False                            | False                | Inactive              |                         |
| 1838 | IP00021917    | P11908              | PHF2      | Isomorph of 1 of Ribose-phosphate pyrophosphokinase 2                                                | 35                                                                   | 0.329           | 0.979                             | 0.34            | False                            | False                | Inactive              |                         |
| 833  | IP00011706    | Q10767              | ESD       | S-fructose-bisphosphate hydrolase                                                                    | 34                                                                   | 0.235           | 0.701                             | 0.34            | False                            | False                | Inactive              |                         |
| 775  | IP00007750    | P68366              | TUBA4A    | Tubulin alpha-4A chain                                                                               | 50                                                                   | 7.680           | 32.899                            | 0.34            | False                            | False                | Inactive              |                         |
| 1752 | IP00010296    | Q8RY85              | SMAP1     | Isomorph of 1 of Stromal membrane-associated protein 1                                               | 50                                                                   | 0.071           | 0.210                             | 0.34            | False                            | False                | Inactive              |                         |
| 1128 | IP00016812    | Q15639              | RAP1A     | Isomorph of 1 of Ras-related protein RAS1                                                            | 34                                                                   | 0.204           | 0.746                             | 0.34            | False                            | False                | Inactive              |                         |
| 561  | IP00019345    | P62834              | SAL1      | Ras-related protein Rap-1A                                                                           | 21                                                                   | 0.923           | 2.683                             | 0.34            | False                            | False                | Inactive              |                         |
| 1872 | IP00087071    | Q10224              | SLIT1A3   | Isomorph of 1 of Slitrotonin receptor 3                                                              | 34                                                                   | 0.085           | 0.244                             | 0.35            | False                            | False                | Inactive              |                         |
| 148  | IP00024971    | Q14748              | TEBTD1    | Isomorph of 1 of Transcription elongation regulator 1                                                | 43                                                                   | 0.165           | 0.498                             | 0.31            | False                            | False                | Inactive              |                         |
| 729  | IP00030607    | Q9H029              | RBM38     | Isomorph of 1 of RNA-binding protein 38                                                              | 25                                                                   | 0.443           | 1.424                             | 0.31            | False                            | False                | Inactive              |                         |
| 49   | IP00030357    | Q60374              | DHFR      | Dihydrofolate reductase                                                                              | 21                                                                   | 0.857           | 2.789                             | 0.31            | False                            | False                | Inactive              |                         |
| 1159 | IP00021628    | Q10771              | PKCE      | Isomorph Beta-1 of Protein kinase C beta type                                                        | 72                                                                   | 0.189</         |                                   |                 |                                  |                      |                       |                         |



Supplementary Table 1 (cont.) | Hierarchical clustering analysis of proteins identified in active or inactive integrin adhesion complexes.

| #    | IPI Accession | UniProtKB Accession | Gene name | Protein name                                                                                                             | Relative abundance (mean normalised spectral count) × 10 <sup>3</sup> |                 |                   | Fold enrichment (active/inactive) |                   | Specific enrichment |                   | Cluster* | Adhesome* | Hierarchical clustering |
|------|---------------|---------------------|-----------|--------------------------------------------------------------------------------------------------------------------------|-----------------------------------------------------------------------|-----------------|-------------------|-----------------------------------|-------------------|---------------------|-------------------|----------|-----------|-------------------------|
|      |               |                     |           |                                                                                                                          | MW (kDa)                                                              | Active integrin | Inactive integrin | Active integrin                   | Inactive integrin | Active integrin     | Inactive integrin |          |           |                         |
| 1661 | IP00027547    | P61605              | DCD       | Dermicidin                                                                                                               | 11                                                                    | 0.092           | 1.074             | 0.09                              | False             | True                | Inactive          | -        | -         |                         |
| 1309 | IP00021434    | R08134              | RHOC      | Rho-related GTP-binding protein RhoC                                                                                     | 22                                                                    | 0.229           | 0.291             | 0.09                              | False             | True                | Inactive          | -        | -         |                         |
| 1541 | IP00038480    | Q86U90              | YRC       | Yrc domain-containing protein, mitochondrial                                                                             | 29                                                                    | 0.025           | 0.286             | 0.09                              | False             | True                | Inactive          | -        | -         |                         |
| 1055 | IP00184821    | Q13057              | COASY     | Isomorph of bifunctional coenzyme A synthase                                                                             | 62                                                                    | 0.052           | 0.419             | 0.12                              | False             | True                | Inactive          | -        | -         |                         |
| 807  | IP00037645    | Q82642              | YRN2      | Isomorph of Y <sub>2</sub> exoribonuclease 1                                                                             | 153                                                                   | 0.029           | 0.233             | 0.12                              | False             | True                | Inactive          | -        | -         |                         |
| 1729 | IP00023556    | Q9N977              | SU12      | Isomorph of RNA polymerase II subunit domain phosphatase SU12                                                            | 23                                                                    | 0.047           | 0.384             | 0.12                              | False             | True                | Inactive          | -        | -         |                         |
| 940  | IP00041356    | Q9R937              | VSPA4     | Vacuolar protein sorting-associated protein 4A                                                                           | 49                                                                    | 0.053           | 0.444             | 0.12                              | False             | True                | Inactive          | -        | -         |                         |
| 712  | IP00013561    | Q13620              | TSG1      | GDP-L-fucose synthase                                                                                                    | 36                                                                    | 0.140           | 1.212             | 0.12                              | False             | True                | Inactive          | -        | -         |                         |
| 1515 | IP00018783    | Q98Y32              | ITPA      | Inosine triphosphatase                                                                                                   | 21                                                                    | 0.072           | 0.618             | 0.12                              | False             | True                | Inactive          | -        | -         |                         |
| 1955 | IP00291928    | P61106              | RAB14     | Ras-related protein Rab-14                                                                                               | 24                                                                    | 0.105           | 0.921             | 0.11                              | False             | True                | Inactive          | -        | -         |                         |
| 1546 | IP00020980    | Q92ND4              | EH2       | EH domain-containing protein 2                                                                                           | 61                                                                    | 0.012           | 0.109             | 0.11                              | False             | True                | Inactive          | -        | -         |                         |
| 690  | IP00023647    | ADAV11              | UBA6      | Isomorph of Ubiquitin-like modifier-activating enzyme 6                                                                  | 118                                                                   | 0.018           | 0.356             | 0.05                              | False             | True                | Inactive          | -        | -         |                         |
| 709  | IP00301204    | Q9NB87              | RDH13     | Retinol dehydrogenase 13                                                                                                 | 36                                                                    | 0.082           | 1.254             | 0.07                              | False             | True                | Inactive          | -        | -         |                         |
| 1154 | IP00011539    | P12882              | HCK9B     | Hemectox protein-like 9B                                                                                                 | 28                                                                    | 0.051           | 0.768             | 0.07                              | False             | True                | Inactive          | -        | -         |                         |
| 1085 | IP00029737    | Q60488              | ACSL4     | Isomorph of Long-chain-fatty-acyl-CoA ligase 4                                                                           | 79                                                                    | 0.019           | 0.317             | 0.06                              | False             | True                | Inactive          | -        | -         |                         |
| 1395 | IP00010782    | Q96046              | GMPPA     | Isomorph of 1 of Manose-1-phosphate guanylyltransferase alpha                                                            | 46                                                                    | 0.022           | 0.358             | 0.06                              | False             | True                | Inactive          | -        | -         |                         |
| 1845 | IP00405659    | Q9R909              | UBQLA2    | Ubiquitin-2                                                                                                              | 66                                                                    | 0.016           | 0.259             | 0.06                              | False             | True                | Inactive          | -        | -         |                         |
| 630  | IP00374068    | Q6UJ74              | ADAMTSL4  | Isomorph of 1 of ADAMTS-like protein 4                                                                                   | 117                                                                   | 0.017           | 0.428             | 0.04                              | False             | True                | Inactive          | -        | -         |                         |
| 871  | IP00178375    | Q43314              | PPSPK2    | Isomorph of 2 of Inositol hexakisphosphate and diphosphoinositil-pentakisphosphate kinase 2                              | 138                                                                   | 0.007           | 0.216             | 0.03                              | False             | True                | Inactive          | -        | -         |                         |
| 591  | IP00027505    | P67796              | ITGAV     | Isomorph of 1 of integrin alpha-V                                                                                        | 116                                                                   | 0.009           | 0.522             | 0.02                              | False             | True                | Inactive          | YES      | -         |                         |
| 877  | IP00012728    | P53121              | ACSL1     | Isomorph of 1 of Long-chain-fatty-acyl-CoA ligase 1                                                                      | 78                                                                    | 0.013           | 0.483             | 0.03                              | False             | True                | Inactive          | -        | -         |                         |
| 888  | IP00472996    | Q8ND24              | RNF214    | RING finger protein 214                                                                                                  | 78                                                                    | 0.013           | 0.482             | 0.03                              | False             | True                | Inactive          | -        | -         |                         |
| 1546 | IP00028876    | P55212              | CASP6     | Isomorph of Alpha of Caspase-6                                                                                           | 38                                                                    | 0               | 0.233             | ND                                | Inactive          | False               | True              | Inactive | -         |                         |
| 1729 | IP00179713    | Q9R902              | IGFBP2    | Isomorph of 1 of Insulin-like growth factor 2 mRNA-binding protein 2                                                     | 65                                                                    | 0.293           | ND                | Inactive                          | False             | True                | Inactive          | -        | -         |                         |
| 1359 | IP00181702    | Q95104              | SFRS15    | Isomorph of 1 of Splicing factor, arginine/serine-rich 15                                                                | 126                                                                   | 0               | 0.105             | ND                                | Inactive          | False               | True              | Inactive | -         | -                       |
| 1608 | IP00011726    | Q02442              | KTDC1     | Isomorph of 1 of RNA 3'-terminal phosphatase cyclase                                                                     | 39                                                                    | 0               | 0.291             | ND                                | Inactive          | False               | True              | Inactive | -         | -                       |
| 1274 | IP00006050    | Q9P4C2              | FAM151A   | Isomorph of 1 of Protein FAM151A                                                                                         | 100                                                                   | 0               | 0.152             | ND                                | Inactive          | False               | True              | Inactive | -         | -                       |
| 1536 | IP00147874    | Q9N945              | NANS      | Sialic acid synthase                                                                                                     | 40                                                                    | 0               | 0.309             | ND                                | Inactive          | False               | True              | Inactive | -         | -                       |
| 1930 | IP00291800    | Q9N9A8              | EIF4ENF1  | Isomorph of 1 of Eukaryotic translation initiation factor 4E transporter                                                 | 108                                                                   | 0               | 0.030             | ND                                | Inactive          | False               | True              | Inactive | -         | -                       |
| 1974 | IP00328798    | Q9N9A8              | RCL6      | Isomorph of 1 of B-cell lymphoma 9-like protein                                                                          | 157                                                                   | 0               | 0.037             | ND                                | Inactive          | False               | True              | Inactive | -         | -                       |
| 1982 | IP00004924    | Q9H4E7              | DFE6      | Differentially expressed protein in FDCP 6 homolog                                                                       | 74                                                                    | 0               | 0.112             | ND                                | Inactive          | False               | True              | Inactive | YES       | -                       |
| 2166 | IP00294618    | Q92733              | PRCC      | Proline-rich protein PRCC                                                                                                | 52                                                                    | 0               | 0.064             | ND                                | Inactive          | False               | True              | Inactive | -         | -                       |
| 1599 | IP00744702    | Q9N9E5              | FAM125A   | Isomorph of 1 of Multivesicular body subunit 12A                                                                         | 29                                                                    | 0               | 0.430             | ND                                | Inactive          | False               | True              | Inactive | -         | -                       |
| 1977 | IP00031411    | Q14517              | FAT1      | 507 kDa protein                                                                                                          | 507                                                                   | 0               | 0.009             | ND                                | Inactive          | False               | True              | Inactive | -         | -                       |
| 1963 | IP00013466    | Q43681              | ASNA1     | ATPase ASNA1                                                                                                             | 39                                                                    | 0               | 0.142             | ND                                | Inactive          | False               | True              | Inactive | -         | -                       |
| 1873 | IP00214562    | P76509              | RLN1      | Retinoin factor 1                                                                                                        | 385                                                                   | 0               | 0.015             | ND                                | Inactive          | False               | True              | Inactive | -         | -                       |
| 2071 | IP000002487   | P42898              | MTHFR     | Methyltetrahydrofolate reductase                                                                                         | 75                                                                    | 0               | 0.096             | ND                                | Inactive          | False               | True              | Inactive | -         | -                       |
| 1368 | IP00031301    | P41273              | TM5SF9    | Tumor necrosis factor ligand superfamily member 9                                                                        | 27                                                                    | 0               | 0.675             | ND                                | Inactive          | False               | True              | Inactive | -         | -                       |
| 1603 | IP00159222    | Q9N9A0              | TCF20     | Isomorph of 1 of Transcription factor 20                                                                                 | 212                                                                   | 0               | 0.045             | ND                                | Inactive          | False               | True              | Inactive | -         | -                       |
| 1814 | IP00007182    | Q9BVC4              | MLST8     | Isomorph of 3 of Target of rapamycin complex subunit LST8                                                                | 24                                                                    | 0               | 0.115             | ND                                | Inactive          | False               | True              | Inactive | -         | -                       |
| 2032 | IP00091508    | Q9R9B6              | METTL1    | 34 kDa protein                                                                                                           | 34                                                                    | 0               | 0.211             | ND                                | Inactive          | False               | True              | Inactive | -         | -                       |
| 2062 | IP00020239    | Q12843              | METTL9    | Isomorph of 1 of Methyltransferase-like protein 9                                                                        | 37                                                                    | 0               | 0.217             | ND                                | Inactive          | False               | True              | Inactive | -         | -                       |
| 533  | IP00087440    | P43487              | RANBP1    | Putative uncharacterized protein RANBP1                                                                                  | 19                                                                    | 0               | 0.380             | ND                                | Inactive          | False               | True              | Inactive | -         | -                       |
| 1206 | IP00021328    | Q6N9X0              | IRGC      | Interferon-inducible GTPase 5                                                                                            | 50                                                                    | 0               | 0.053             | ND                                | Inactive          | False               | True              | Inactive | -         | -                       |
| 1467 | IP00001735    | Q9R9L8              | NCKO2     | Isomorph of 1 of Nuclear receptor corepressor 2                                                                          | 276                                                                   | 0               | 0.025             | ND                                | Inactive          | False               | True              | Inactive | -         | -                       |
| 1530 | IP00055071    | Q9R9W2              | PLN41     | Plen-41                                                                                                                  | 211                                                                   | 0               | 0.045             | ND                                | Inactive          | False               | True              | Inactive | -         | -                       |
| 939  | IP00026288    | P62873              | GMB1      | Guanine nucleotide-binding protein G(I)/G(S)/G(T) subunit beta-1                                                         | 27                                                                    | 0               | 0.071             | ND                                | Inactive          | False               | True              | Inactive | -         | -                       |
| 258  | IP00382804    | Q14222              | EEF1A1    | EEF1A1 protein (Fragment)                                                                                                | 24                                                                    | 0               | 4.266             | ND                                | Inactive          | False               | True              | Inactive | -         | -                       |
| 2257 | IP00002149    | Q9R9L8              | SAR1B     | GTP-binding protein SAR1B                                                                                                | 22                                                                    | 0               | 0.377             | ND                                | Inactive          | False               | True              | Inactive | -         | -                       |
| 1168 | IP00413730    | Q9N919              | ACSS2     | Acetyl-coenzyme A synthetase, cytoplasmic                                                                                | 79                                                                    | 0               | 0.280             | ND                                | Inactive          | False               | True              | Inactive | -         | -                       |
| 493  | IP00128330    | Q9R9V1              | PPSPK1    | Isomorph of 5 of Inositol hexakisphosphate and diphosphoinositil-pentakisphosphate kinase 1                              | 133                                                                   | 0               | 0.084             | ND                                | Inactive          | False               | True              | Inactive | -         | -                       |
| 1645 | IP00021317    | Q14657              | Torsin1   | Torsin-1                                                                                                                 | 38                                                                    | 0               | 0.073             | ND                                | Inactive          | False               | True              | Inactive | -         | -                       |
| 1692 | IP00215191    | P84085              | ARIS      | ADP-ribosylation factor 1                                                                                                | 37                                                                    | 0               | 0.552             | ND                                | Inactive          | False               | True              | Inactive | -         | -                       |
| 770  | IP00390130    | Q9R9U5              | TUBB6     | Tubulin beta-2C chain                                                                                                    | 45                                                                    | 0               | 60.600            | ND                                | Inactive          | False               | True              | Inactive | -         | -                       |
| 2258 | IP00016711    | Q9N9K2              | TUBA1C    | Isomorph of 1 of Tubulin alpha chain class 3                                                                             | 50                                                                    | 0               | 0.502             | ND                                | Inactive          | False               | True              | Inactive | -         | -                       |
| 2205 | IP00011488    | Q13043              | STR4      | Isomorph of 1 of Serine/threonine-protein kinase 4                                                                       | 46                                                                    | 0               | 0.069             | ND                                | Inactive          | False               | True              | Inactive | -         | -                       |
| 1230 | IP00215918    | P18085              | ARF4      | ADP-ribosylation factor 4                                                                                                | 21                                                                    | 0               | 2.065             | ND                                | Inactive          | False               | True              | Inactive | -         | -                       |
| 2215 | IP00306439    | Q9R9V7              | C18orf55  | TIM21-like protein, mitochondrial                                                                                        | 28                                                                    | 0               | 0.118             | ND                                | Inactive          | False               | True              | Inactive | -         | -                       |
| 2256 | IP00024502    | Q9N9R5              | UBQLN4    | Ubiquitin-4                                                                                                              | 64                                                                    | 0               | 0.086             | ND                                | Inactive          | False               | True              | Inactive | -         | -                       |
| 2182 | IP00043808    | Q9NZ20              | DTL       | Isomorph of 1 of Denticles-like protein homolog                                                                          | 79                                                                    | 0               | 0.056             | ND                                | Inactive          | False               | True              | Inactive | -         | -                       |
| 1768 | IP00013111    | Q13617              | CUL2      | Cullin-2                                                                                                                 | 90                                                                    | 0               | 0.098             | ND                                | Inactive          | False               | True              | Inactive | -         | -                       |
| 2211 | IP00004567    | Q9N9M4              | PRMT7     | Isomorph of 1 of Protein arginine N-methyltransferase 7                                                                  | 78                                                                    | 0               | 0.042             | ND                                | Inactive          | False               | True              | Inactive | -         | -                       |
| 2249 | IP00393994    | Q20A6               | MOB2      | Isomorph of 1 of Mps one binder kinase activator-like 2                                                                  | 27                                                                    | 0               | 0.082             | ND                                | Inactive          | False               | True              | Inactive | -         | -                       |
| 1054 | IP00031420    | Q9R9V1              | UGN9      | UDP-glucose 5-epimerase                                                                                                  | 55                                                                    | 0               | 0.251             | ND                                | Inactive          | False               | True              | Inactive | -         | -                       |
| 2117 | IP00292827    | Q9P289              | MST4      | Serine/threonine-protein kinase MST4                                                                                     | 47                                                                    | 0               | 0.047             | ND                                | Inactive          | False               | True              | Inactive | -         | -                       |
| 1726 | IP00182938    | Q43865              | ANCLY1    | Isomorph of 1 of Putative adenylosuccinyltransferase 1                                                                   | 59                                                                    | 0               | 0.103             | ND                                | Inactive          | False               | True              | Inactive | -         | -                       |
| 1951 | IP00023522    | Q9N9A6              | SH3GLB2   | Bifunctional UDP-N-acetylglucosamine 2-epimerase/N-acetylmannosamine kinase                                              | 79                                                                    | 0               | 0.098             | ND                                | Inactive          | False               | True              | Inactive | -         | -                       |
| 1926 | IP00024540    | Q9N9A6              | SH3GLB2   | Isomorph of 1 of Endophilin-82                                                                                           | 44                                                                    | 0               | 0.085             | ND                                | Inactive          | False               | True              | Inactive | -         | -                       |
| 1647 | IP00008475    | Q01581              | HMGCS1    | Hydroxymethylglutaryl-CoA synthase, cytoplasmic                                                                          | 57                                                                    | 0               | 0.194             | ND                                | Inactive          | False               | True              | Inactive | -         | -                       |
| 1728 | IP00017509    | Q13422              | PNP1      | Isomorph of 1 of Phosphoprotein 1                                                                                        | 83                                                                    | 0               | 0.060             | ND                                | Inactive          | False               | True              | Inactive | -         | -                       |
| 1404 | IP00065149    | Q9SC06              | IRAK1     | Interleukin-1 receptor-associated kinase 1 isoform 3                                                                     | 57                                                                    | 0               | 0.284             | ND                                | Inactive          | False               | True              | Inactive | -         | -                       |
| 2185 | IP00021907    | P28161              | GM22      | Glutathione S-transferase Mu 2                                                                                           | 26                                                                    | 0               | 0.085             | ND                                | Inactive          | False               | True              | Inactive | -         | -                       |
| 1879 | IP00295741    | P07858              | CTSB      | Cathepsin B                                                                                                              | 36                                                                    | 0               | 0.167             | ND                                | Inactive          | False               | True              | Inactive | -         | -                       |
| 2045 | IP00001640    | Q9R9L5              | GAMT1     | N10-adenine-specific DNA methyltransferase 1                                                                             | 50                                                                    | 0               | 0.168             | ND                                | Inactive          | False               | True              | Inactive | -         | -                       |
| 2046 | IP00001640    | Q9R9L5              | GAMT1     | N10-adenine-specific DNA methyltransferase 1                                                                             | 53                                                                    | 0               | 0.168             | ND                                | Inactive          | False               | True              | Inactive | -         | -                       |
| 1678 | IP00047727    | Q9N9V4              | KIF78     | Isomorph of 1 of Keratin, type II cytoskeletal 78                                                                        | 27                                                                    | 0               | 0.587             | ND                                | Inactive          | False               | True              | Inactive | -         | -                       |
| 1980 | IP00157965    | Q9R9V1              | NEB       | NEB domain protein 1 (Negative regulator of ubiquitin-like proteins 1) (Renal carcinoma antigen NYN-RE18); Isoform 2     | 22                                                                    | 0               | 0.107             | ND                                | Inactive          | False               | True              | Inactive | -         | -                       |
| 1651 | IP00220630    | P49023              | PN2       | Isomorph of Alpha of Paxillin                                                                                            | 61                                                                    | 0               | 0.136             | ND                                | Inactive          | False               | True              | Inactive | -         | -                       |
| 957  | IP00013232    | Q13422              | IKZF1     | Isomorph of IK3 of DNA-binding protein Ikaros                                                                            | 68                                                                    | 0               | 0.067             | ND                                | Inactive          | False               | True              | Inactive | -         | -                       |
| 1789 | IP00054527    | P02726              | ACTA2     | ACTA2 protein (Fragment)                                                                                                 | 37                                                                    | 0               | 27.448            | ND                                | Inactive          | False               | True              | Inactive | YES*      | -                       |
| 1806 | IP00046951    | Q9R9W2              | HMG20B    | Isomorph of 1 of SWI/SNF-related, matrix-associated, actin-dependent regulator of chromatin subfamily E member 1-related | 36                                                                    | 0               | 0.082             | ND                                | Inactive          | False               | True              | Inactive | -         | -                       |
| 1828 | IP00017993    | P35326              | SRP2A     | Small proline-rich protein 2A                                                                                            | 8                                                                     | 0               | 0.902             | ND                                | Inactive          | False               | True              | Inactive | -         | -                       |
| 1835 | IP00300096    | Q15235              | CRPT      | Nucleotide nucleoside-related phosphatase (carboxylating)                                                                | 50                                                                    | 0               | 0.206             | ND                                | Inactive          | False               | True              | Inactive | -         | -                       |
| 2255 | IP00166394    | Q9N9V6              | ARMCD10   | Isomorph of 1 of Armadillo repeat-containing protein 10                                                                  | 38                                                                    | 0               | 0.085             | ND                                | Inactive          | False               | True              | Inactive | -         | -                       |
| 2261 | IP00031545    | Q14571              | ITPR2     | Isomorph of 1 of Aradillo repeat-containing protein type 2                                                               | 308                                                                   | 0               | 0.011             | ND                                | Inactive          | False               | True              | Inactive | -         | -                       |
| 2265 | IP00045112    | P12035              | KRT5      | Keratin 5                                                                                                                | 64                                                                    | 0               | 0.760             | ND                                | Inactive          | False               | True              | Inactive | -         | -                       |
| 2004 | IP00074931    | Q9R9Y8              | GORASP2   | Golgi reassembly-stacking protein 2                                                                                      | 49                                                                    | 0               | 0.056             | ND                                | Inactive          | False               | True              | Inactive | -         | -                       |
| 1294 | IP00088911    | Q13620              | TSG1      | Actin alpha 1 skeletal muscle protein                                                                                    | 51                                                                    | 0               | 0.051             | ND                                | Inactive          | False               | True              | Inactive | -         | -                       |
| 2212 | IP00039845    | Q9N9E7              | PANK4     | Pantothenate kinase 4                                                                                                    | 86                                                                    | 0               | 0.051             | ND                                | Inactive          | False               | True              | Inactive | -         | -                       |
| 1770 | IP00007401    | Q15397              | IPO8      | Importin-8                                                                                                               | 120                                                                   | 0               | 0.087             | ND                                | Inactive          | False               | True              | Inactive | -         | -                       |
| 1821 | IP00078409    | Q9R9P3              | HAT1P2    | Isomorph of 1 of Orotidyltransferase HAT1P2                                                                              | 27                                                                    | 0               | 0.225             | ND                                | Inactive          | False               | True              | Inactive | -         | -                       |
| 1864 | IP00030751    | Q15014              | ZNF69     | Zinc finger protein 609                                                                                                  | 115                                                                   | 0               | 0.054             | ND                                | Inactive          | False               | True              | Inactive | -         | -                       |
| 1156 | IP00041900    | Q27270              | KIAA0907  | Isomorph of 1 of UPP460 protein KIAA0907                                                                                 | 65                                                                    | 0               | 0.195             | ND                                | Inactive          | False               | True              | Inactive | -         | -                       |
| 2110 | IP00024928    | Q92608              | DOCK2     | Isomorph of 1 of Dedicator of cytokinesis protein 2                                                                      | 212                                                                   | 0               | 0.013             | ND                                | Inactive          | False               | True              | Inactive | -         | -                       |
| 2159 | IP00049488    | Q9R9V5              | PPP1R15   | Isomorph of 1 of Fork-associated inhibitor                                                                               | 89                                                                    | 0               | 0.044             | ND                                | Inactive          | False               |                   |          |           |                         |

Supplementary Table 1 (cont.) | Hierarchical clustering analysis of proteins identified in active or inactive integrin adhesion complexes.

| #      | API Accession | UniProtKB Accession | Gene name | Protein name                                                                                                           | Protein MW (kDa) | Relative abundance (mean normalized spectral counts) × 10 <sup>3</sup> |                   | Fold enrichment (active/inactive) (integrin <sup>+</sup> ) |                   | Specific enrichment <sup>†</sup> |                   | Adhesome <sup>‡</sup> | Hierarchical clustering |
|--------|---------------|---------------------|-----------|------------------------------------------------------------------------------------------------------------------------|------------------|------------------------------------------------------------------------|-------------------|------------------------------------------------------------|-------------------|----------------------------------|-------------------|-----------------------|-------------------------|
|        |               |                     |           |                                                                                                                        |                  | Active integrin                                                        | Inactive integrin | Active integrin                                            | Inactive integrin | Active integrin                  | Inactive integrin |                       |                         |
| 2195   | PI00007304    | Q95376              | AHRH2     | Protein araline-2 homolog                                                                                              | 58               | 0                                                                      | 0.076             | ND (inactive)                                              | False             | True                             | Inactive          | -                     |                         |
| 1897   | PI00152200    | Q57653              | PRH1      | Integrin $\alpha$ 2 PHD finger protein 19                                                                              | 23               | 0                                                                      | 0.228             | ND (inactive)                                              | False             | True                             | Inactive          | -                     |                         |
| 1997   | PI00093183    | Q98927              | DGCR6L    | DGCR6 protein                                                                                                          | 25               | 0                                                                      | 0.233             | ND (inactive)                                              | False             | True                             | Inactive          | -                     |                         |
| 1999   | PI00024664    | P45974              | UBPS      | Ubiquitin Long Ubiquitin carboxyl-terminal hydrolase 5                                                                 | 96               | 0                                                                      | 0.029             | ND (inactive)                                              | False             | False                            | Inactive          | -                     |                         |
| 2020   | PI00115683    | Q13569              | TUBB3     | Tubulin beta 3 chain                                                                                                   | 50               | 0                                                                      | 1.003             | ND (inactive)                                              | False             | False                            | Inactive          | -                     |                         |
| 1198   | PI00739464    |                     |           | Actin, gamma 1                                                                                                         | 17               | 0                                                                      | 0.325             | ND (inactive)                                              | False             | False                            | Inactive          | -                     |                         |
| 2152   | PI00067799    | Q8BTU1              | BHDH2     | Isomorphin $\alpha$ 3 hydroxybutyrate dehydrogenase type 2                                                             | 27               | 0                                                                      | 0.143             | ND (inactive)                                              | False             | True                             | Inactive          | -                     |                         |
| 1962   | PI00001676    | Q17430              | NROCK4    | Isomorphin $\alpha$ 2 Nuclear protein localization protein 4 homolog                                                   | 69               | 0                                                                      | 0.054             | ND (inactive)                                              | False             | True                             | Inactive          | -                     |                         |
| 1803   | PI00021264    | PS1911              | CNN1      | Calponin-1                                                                                                             | 33               | 0                                                                      | 0.269             | ND (inactive)                                              | False             | True                             | Inactive          | -                     |                         |
| 1913   | PI00783502    | Q53E70              | CRT2      | CRIB-regulated transcription coactivator 2                                                                             | 72               | 0                                                                      | 0.090             | ND (inactive)                                              | False             | True                             | Inactive          | -                     |                         |
| 2158   | PI00165454    | Q26910              | SRN1      | Sulfiredoxin-1                                                                                                         | 14               | 0                                                                      | 0.193             | ND (inactive)                                              | False             | False                            | Inactive          | -                     |                         |
| 1432   | PI00294739    | Q9Y2E3              | SAMHD1    | Isomorphin $\alpha$ 1 of SAM domain and HD domain-containing protein 1                                                 | 73               | 0                                                                      | 0.233             | ND (inactive)                                              | False             | True                             | Inactive          | -                     |                         |
| 1953   | PI00062882    | Q12743              | CTU1      | Cytoplasmic tRNA 2-thiolation protein 1                                                                                | 36               | 0                                                                      | 0.073             | ND (inactive)                                              | False             | False                            | Inactive          | -                     |                         |
| 2019   | PI00055062    | Q56127              | DHRH1     | Dehydrogenase/reductase SDR family member 1                                                                            | 34               | 0                                                                      | 0.129             | ND (inactive)                                              | False             | True                             | Inactive          | -                     |                         |
| 2149   | PI00058949    | O14976              | GAK       | Cyclin-G-associated kinase                                                                                             | 143              | 0                                                                      | 0.015             | ND (inactive)                                              | False             | False                            | Inactive          | -                     |                         |
| 1756   | PI00152089    | Q8T803              | CkxR38    | Isomorphin $\alpha$ 1 of Uncharacterized protein CkxR38                                                                | 37               | 0                                                                      | 0.149             | ND (inactive)                                              | False             | True                             | Inactive          | -                     |                         |
| 2111   | PI00025340    | Q56500              | P5MP      | Pyridoxal-phosphate phosphatase                                                                                        | 0                | 32                                                                     | 0.128             | ND (inactive)                                              | False             | False                            | Inactive          | -                     |                         |
| 1942   | PI00442073    | P21251              | CSRP1     | Cysteine and glycine-rich protein 1                                                                                    | 21               | 0                                                                      | 0.219             | ND (inactive)                                              | False             | True                             | Inactive          | YES                   |                         |
| 2096   | PI00296370    | Q9JUC8              | LCMT1     | Putative uncharacterized protein LCMT1                                                                                 | 39               | 0                                                                      | 0.142             | ND (inactive)                                              | False             | True                             | Inactive          | -                     |                         |
| 2138   | PI00306871    | Q52680              | KATZA     | Isomorphin $\alpha$ 1 of Histone acetyltransferase KATZA                                                               | 94               | 0                                                                      | 0.029             | ND (inactive)                                              | False             | False                            | Inactive          | -                     |                         |
| 152    | PI00302925    | P09990              | CTB       | 59 kDa protein                                                                                                         | 59               | 2.687                                                                  | 1.971             | 1.44                                                       | False             | False                            | Active            | -                     |                         |
| 841    | PI00031521    | P40938              | RFC3      | Replication factor C subunit 3                                                                                         | 41               | 0.416                                                                  | 0.290             | 1.43                                                       | False             | False                            | Active            | -                     |                         |
| 194    | PI00177963    | P62336              | SNRPD2    | Small nuclear ribonucleoprotein Sm D2                                                                                  | 14               | 8.673                                                                  | 6.011             | 1.44                                                       | False             | False                            | Active            | -                     |                         |
| 812    | PI00460208    | P05174              | DNAH1     | Triosephosphate isomerase 1 isomorphin 2                                                                               | 24               | 3.766                                                                  | 2.537             | 1.44                                                       | False             | False                            | Active            | -                     |                         |
| 523    | PI00328319    | Q90208              | RBBP4     | Histone-binding protein RBBP4                                                                                          | 48               | 0.938                                                                  | 0.650             | 1.44                                                       | False             | False                            | Active            | -                     |                         |
| 410    | PI00470891    | Q75334              | CSDE1     | Isomorphin $\alpha$ 1 of Gold shock domain-containing protein E1                                                       | 89               | 0.636                                                                  | 0.441             | 1.44                                                       | False             | False                            | Active            | -                     |                         |
| 647    | PI00241175    | Q14818              | PSMA7     | Isomorphin $\alpha$ 1 of Proteasome subunit alpha type-7                                                               | 198              | 1.222                                                                  | 0.848             | 1.44                                                       | False             | False                            | Active            | -                     |                         |
| 238    | PI00384456    | PS7201              | MSH6      | Isomorphin $\alpha$ 1 of GTP- $\gamma$ -DNA mismatch repair protein Msh6                                               | 153              | 0.546                                                                  | 0.376             | 1.45                                                       | False             | False                            | Active            | -                     |                         |
| 253    | PI00292566    | P17987              | TCF1      | T-complex protein 1 subunit alpha                                                                                      | 60               | 1.634                                                                  | 1.124             | 1.45                                                       | False             | False                            | Active            | -                     |                         |
| 274    | PI00212623    | YWH4Z2              | YWH4Z2    | 14-3-3 protein zeta/delta                                                                                              | 28               | 3.096                                                                  | 2.135             | 1.45                                                       | False             | False                            | Active            | -                     |                         |
| 340    | PI00303020    | P26156              | DDX6      | Probable ATP-dependent RNA helicase DDX6                                                                               | 54               | 1.249                                                                  | 0.857             | 1.46                                                       | False             | False                            | Active            | -                     |                         |
| 593    | PI00216691    | Q70737              | PRF1      | Prorhin-1                                                                                                              | 15               | 2.400                                                                  | 1.646             | 1.46                                                       | False             | False                            | Active            | YES                   |                         |
| 283    | PI00376005    | Q97990              | EIF5A     | Isomorphin $\alpha$ 2 Eukaryotic translation initiation factor 5A-1                                                    | 20               | 3.755                                                                  | 2.575             | 1.46                                                       | False             | False                            | Active            | -                     |                         |
| 671    | PI00555878    | Q9NRW3              | APORC3C1  | Probable DNA dCpG-dT-editing enzyme APORC3-C                                                                           | 23               | 1.180                                                                  | 0.809             | 1.46                                                       | False             | False                            | Active            | -                     |                         |
| 1191   | PI00292695    | Q12824              | SMARCB1   | Isomorphin $\alpha$ 1 of SWI/SNF-related matrix-associated actin-dependent regulator of chromatin subfamily B member 1 | 44               | 0.252                                                                  | 0.173             | 1.46                                                       | False             | False                            | Active            | -                     |                         |
| 1025   | PI00214249    | Q99614              | PCP2      | Isomorphin $\alpha$ 1 of mental retardation syndrome-related protein 1                                                 | 70               | 0.124                                                                  | 0.084             | 1.48                                                       | False             | False                            | Active            | -                     |                         |
| 82     | PI00140420    | Q7K274              | SNF1      | Staphylococcal nuclease domain-containing protein 1                                                                    | 102              | 2.070                                                                  | 1.464             | 1.41                                                       | False             | False                            | Active            | -                     |                         |
| 526    | PI00293919    | P62195              | PSMCS5    | 26S protease regulatory subunit 8                                                                                      | 46               | 0.886                                                                  | 0.627             | 1.41                                                       | False             | False                            | Active            | -                     |                         |
| 254    | PI00292425    | Q99760              | RFC2      | Isomorphin $\alpha$ 1 of Kinesin-like motor protein RFC2                                                               | 85               | 0.943                                                                  | 0.665             | 1.42                                                       | False             | False                            | Active            | -                     |                         |
| 796    | PI00290416    | Q9N7K5              | OLA1      | Isomorphin $\alpha$ 1 of Obj-like ATPase 1                                                                             | 45               | 0.534                                                                  | 0.377             | 1.42                                                       | False             | False                            | Active            | -                     |                         |
| 166    | PI00031415    | P62081              | RPS7      | 40S ribosomal protein S7                                                                                               | 22               | 4.907                                                                  | 3.436             | 1.43                                                       | False             | False                            | Active            | -                     |                         |
| 374    | PI00268020    | Q9N072              | CNOT1     | Isomorphin $\alpha$ 1 of CCR-NOT transcription complex subunit 1                                                       | 199              | 0.289                                                                  | 0.209             | 1.43                                                       | False             | False                            | Active            | -                     |                         |
| 744    | PI00302619    | Q10570              | CFP1      | Cleavage and polyadenylation specificity factor subunit 1                                                              | 161              | 0.147                                                                  | 0.103             | 1.43                                                       | False             | False                            | Active            | -                     |                         |
| 1053   | PI00294178    | P30154              | PPP2R1B   | Isomorphin $\alpha$ 1 of Serine/threonine-protein phosphatase 2A 65 kDa regulatory subunit A beta isoform              | 66               | 0.323                                                                  | 0.226             | 1.43                                                       | False             | False                            | Active            | -                     |                         |
| 832    | PI00131998    | P17980              | PSM6      | 26S protease regulatory subunit 6a                                                                                     | 49               | 0.470                                                                  | 0.328             | 1.43                                                       | False             | False                            | Active            | -                     |                         |
| 623    | PI00005511    | Q7R7V0              | PHF5A     | PHD finger-like domain-containing protein 5A                                                                           | 12               | 2.748                                                                  | 1.928             | 1.43                                                       | False             | False                            | Active            | -                     |                         |
| 1236   | PI00031681    | P24941              | CDK2      | Cell division protein kinase 2                                                                                         | 34               | 1.063                                                                  | 0.747             | 1.42                                                       | True              | False                            | Active            | -                     |                         |
| 64     | PI00191058    | Q5T6W2              | HNRNPK    | Heterogeneous nuclear ribonucleoprotein K                                                                              | 49               | 5.216                                                                  | 3.748             | 1.39                                                       | False             | False                            | Active            | -                     |                         |
| 588    | PI00795769    |                     |           | 52 kDa protein                                                                                                         | 52               | 0.622                                                                  | 0.450             | 1.40                                                       | False             | False                            | Active            | -                     |                         |
| 620    | PI00080552    | O76003              | GLRX3     | Glutaredoxin-3                                                                                                         | 37               | 0.588                                                                  | 0.420             | 1.40                                                       | False             | False                            | Active            | -                     |                         |
| 1607   | PI00224605    | Q14578              | CTT       | Isomorphin $\alpha$ 1 of Citron rho-interacting kinase                                                                 | 231              | 0.013                                                                  | 0.010             | 1.30                                                       | False             | False                            | Active            | -                     |                         |
| 160    | PI00218907    | P05583              | HMG2      | High mobility group protein 2                                                                                          | 24               | 3.985                                                                  | 2.800             | 1.40                                                       | False             | False                            | Active            | -                     |                         |
| 332    | PI00052273    | P22102              | GART      | Isomorphin $\alpha$ 1 of Trifunctional purine biosynthetic protein adenosine-3                                         | 108              | 0.579                                                                  | 0.386             | 1.50                                                       | False             | False                            | Active            | -                     |                         |
| 1074   | PI00119316    | Q13155              | AMP2      | Aminoacyl tRNA synthetase complex-interacting multifunctional protein 2                                                | 35               | 0.356                                                                  | 0.238             | 1.50                                                       | False             | False                            | Active            | -                     |                         |
| 17     | PI00179130    | P02979              | UBA1      | ubiquitin and ribosomal protein S27a precursor                                                                         | 18               | 1.714                                                                  | 1.247             | 1.40                                                       | False             | False                            | Active            | -                     |                         |
| 319    | PI00788907    | Q9G651              | PGAM5     | Isomorphin $\alpha$ 1 of Serine/threonine-protein phosphatase PGAM5, mitochondrial                                     | 32               | 1.886                                                                  | 1.283             | 1.47                                                       | False             | False                            | Active            | -                     |                         |
| 670    | PI00220835    | P60468              | SGS3      | Protein transport protein SecY1 subunit beta                                                                           | 10               | 3.449                                                                  | 2.345             | 1.47                                                       | False             | False                            | Active            | -                     |                         |
| 974    | PI00745613    | Q9N903              | EXOSC4    | Exosome complex exonuclease RRP41                                                                                      | 28               | 0.465                                                                  | 0.315             | 1.47                                                       | False             | False                            | Active            | -                     |                         |
| 89     | PI00219156    | P62888              | RPL30     | 60S ribosomal protein L30                                                                                              | 13               | 16.921                                                                 | 11.420            | 1.48                                                       | False             | False                            | Active            | -                     |                         |
| 610    | PI00291093    | P19388              | POLR2E    | DNA-directed RNA polymerases I, II, and III subunit RPAPC1                                                             | 25               | 1.558                                                                  | 1.051             | 1.48                                                       | False             | False                            | Active            | -                     |                         |
| 717    | PI00152881    | Q99760              | SHROD2    | RNAP family member 3 protein 2                                                                                         | 117              | 0.200                                                                  | 0.139             | 1.48                                                       | False             | False                            | Active            | -                     |                         |
| 331    | PI00302850    | P62314              | SNRPD1    | S1.828 nuclear ribonucleoprotein Sm D1                                                                                 | 13               | 5.828                                                                  | 3.923             | 1.49                                                       | False             | False                            | Active            | -                     |                         |
| 517    | PI00282840    | Q86911              | THOC4     | THO complex 4                                                                                                          | 28               | 1.716                                                                  | 1.156             | 1.48                                                       | False             | False                            | Active            | -                     |                         |
| 264    | PI00184200    | Q99760              | MCMD2     | DNA replication licensing factor MCM2                                                                                  | 70               | 0.852                                                                  | 0.574             | 1.48                                                       | False             | False                            | Active            | -                     |                         |
| 1252   | PI00220637    | P49591              | SARS      | Seryl-tRNA synthetase, cytoplasmic                                                                                     | 59               | 0.190                                                                  | 0.128             | 1.48                                                       | False             | False                            | Active            | -                     |                         |
| 2016   | PI00384339    | P08107              | HSPAL1    | Heat shock 70 kDa protein 1                                                                                            | 70               | 2.894                                                                  | 1.958             | 1.48                                                       | False             | False                            | Active            | YES                   |                         |
| 1358   | PI00254590    | Q99760              | RAB32A2   | Isomorphin $\alpha$ 1 of Rab GTPase-activating protein non-catalytic subunit 3                                         | 150              | 0.047                                                                  | 0.033             | 1.43                                                       | False             | False                            | Active            | -                     |                         |
| 673    | PI00070818    | Q9JUK6              | CFP5      | Cleavage and polyadenylation specificity factor subunit 5                                                              | 77               | 0.344                                                                  | 0.231             | 1.49                                                       | False             | False                            | Active            | -                     |                         |
| 818    | PI00292975    | Q9P246              | RBM27     | RNA-binding protein 27                                                                                                 | 119              | 0.189                                                                  | 0.127             | 1.49                                                       | False             | False                            | Active            | -                     |                         |
| 1059   | PI00289610    | Q92768              | HMG2L     | Isomorphin $\alpha$ 2 of Histone deacetylase 2                                                                         | 69               | 0.407                                                                  | 0.279             | 1.46                                                       | False             | False                            | Active            | -                     |                         |
| 25     | PI00083857    | Q9N039              | HNRNPJ    | Isomorphin $\alpha$ 1 of Heterogeneous nuclear ribonucleoprotein U                                                     | 91               | 5.059                                                                  | 3.346             | 1.51                                                       | False             | False                            | Active            | -                     |                         |
| 287    | PI00018465    | Q99832              | CC7       | T-complex protein 1 subunit eta                                                                                        | 59               | 1.519                                                                  | 1.005             | 1.51                                                       | False             | False                            | Active            | -                     |                         |
| 536    | PI00292623    | P60900              | PSM6B     | Proteasome subunit alpha type-6                                                                                        | 27               | 1.520                                                                  | 1.004             | 1.51                                                       | False             | False                            | Active            | -                     |                         |
| 1040   | PI00166983    | Q99760              | PKA1      | Phosphotransferase kinase 1                                                                                            | 45               | 0.310                                                                  | 0.205             | 1.51                                                       | False             | False                            | Active            | -                     |                         |
| 185    | PI00029731    | P18077              | RPL35A    | 60S ribosomal protein L35a                                                                                             | 13               | 6.697                                                                  | 4.413             | 1.52                                                       | False             | False                            | Active            | -                     |                         |
| 45     | PI00202781    | P49327              | FA3N      | Fatty acid synthase                                                                                                    | 273              | 1.271                                                                  | 0.836             | 1.52                                                       | False             | False                            | Active            | -                     |                         |
| 115    | PI00225491    | P08442              | EIF4L1    | Eukaryotic initiation factor 4A-1                                                                                      | 46               | 3.021                                                                  | 2.056             | 1.52                                                       | False             | False                            | Active            | -                     |                         |
| 2264   | PI00087157    | P78362              | SRPK2     | Putative uncharacterized protein SRPK2 (Fragment)                                                                      | 82               | 0.304                                                                  | 0.200             | 1.52                                                       | False             | False                            | Active            | -                     |                         |
| 54     | PI00101740    | P23246              | SFPO      | Isomorphin $\alpha$ 1 of Splicing factor, proline- and glutamine-rich                                                  | 76               | 3.604                                                                  | 2.353             | 1.53                                                       | False             | False                            | Active            | -                     |                         |
| 1634   | PI00115100    | Q9N053              | MTFCD2    | Cytosolic oxidase subunit 2                                                                                            | 28               | 0.151                                                                  | 0.100             | 1.54                                                       | False             | False                            | Active            | -                     |                         |
| 285    | PI00182757    | Q9N163              | KIAA1967  | Isomorphin $\alpha$ 1 of Protein KIAA1967                                                                              | 103              | 0.847                                                                  | 0.624             | 1.36                                                       | False             | False                            | Active            | -                     |                         |
| 300    | PI00293434    | P37108              | SRP14     | Signal recognition particle 14 kDa protein                                                                             | 15               | 4.954                                                                  | 3.638             | 1.36                                                       | False             | False                            | Active            | -                     |                         |
| 243    | PI00112932    | Q9N012              | SNRPB     | U1 small nuclear ribonucleoprotein A                                                                                   | 71               | 2.498                                                                  | 1.498             | 1.37                                                       | False             | False                            | Active            | -                     |                         |
| 62     | PI00221091    | P62244              | RPS15A    | 40S ribosomal protein S15a                                                                                             | 15               | 15.069                                                                 | 11.019            | 1.37                                                       | False             | False                            | Active            | -                     |                         |
| 723    | PI00299214    | P04183              | TKL1      | Thymidine kinase, cytosolic                                                                                            | 25               | 1.014                                                                  | 0.742             | 1.37                                                       | False             | False                            | Active            | -                     |                         |
| 389    | PI00220442    | P05180              | YWHAG     | 14-3-3 protein gamma 1                                                                                                 | 36               | 3.438                                                                  | 2.511             | 1.37                                                       | False             | False                            | Active            | -                     |                         |
| 48     | PI00051159    | Q92616              | GCN11     | Translational activator GCN1                                                                                           | 293              | 1.090                                                                  | 0.795             | 1.37                                                       | False             | False                            | Active            | -                     |                         |
| 1394   | PI00554681    | Q16718              | NDR4F5    | NAH domain thymosin [ $\beta$ -tubulin] 1 alpha subcomplex subunit 5                                                   | 13               | 0.659                                                                  | 0.481             | 1.37                                                       | False             | False                            | Active            | -                     |                         |
| 151    | PI00090328    | P18912              | EIF4A3    | Eukaryotic initiation factor 4A-III                                                                                    | 47               | 2.827                                                                  | 1.960             | 1.37                                                       | False             | False                            | Active            | -                     |                         |
| 433    | PI00294159    | PS3007              | SLC25A1   | Tricarballoylate transport protein, mitochondrial                                                                      | 34               | 1.472                                                                  | 1.073             | 1.37                                                       | False             | False                            | Active            | -                     |                         |
| 2037   | PI00384265    | Q9N282              | FAM120A   | Isomorphin $\alpha$ 1 of Constitutive coactivator of PP1A-gamma-like protein 1                                         | 125              | 0.014                                                                  | 0.011             | 1.27                                                       | False             | False                            | Active            | -                     |                         |
| Q26838 | PI00002874    | Q99760              | PCNA2     | Proliferating cell nuclear antigen 2                                                                                   | 22               | 5.899                                                                  | 4.130             | 1.43                                                       | False             | False                            | Active            | -                     |                         |
| 609    | PI00396371    | P27816              | MAP4      | Isomorphin $\alpha$ 1 of Microtubule-associated protein 4                                                              | 121              | 1.213                                                                  | 0.854             | 1.38                                                       | False             | False                            | Active            | -                     |                         |
| 791    | PI00746351    | Q9Y211              | DS3       | Isomorphin $\alpha$ 1 of Exosome complex exonuclease RRP44                                                             | 109              | 0.207                                                                  | 0.151             | 1.37                                                       | False             | False                            | Active            | -                     |                         |
| 370    | PI00258000    | Q90249              | IGFBP3    | Isomorphin $\alpha$ 1 of Insulin-like growth factor 3, IGF-binding protein 3                                           | 62               | 0.943                                                                  | 0.683             | 1.38                                                       | False             | False                            | Active            | -                     |                         |
| 930    | PI00294955    | Q9Y420              | LSM4      | U5 snRNP-associated Sm-like protein LSM4                                                                               | 15               | 0.859                                                                  | 0.622             | 1.38                                                       | False             | False                            | Active            | -                     |                         |
| 1469   | PI00087174    | Q9Y417              | MVCBP     | C-Myc-binding protein                                                                                                  | 12               | 0.756                                                                  | 0.547             | 1.38                                                       | False             | False                            | Active            | -                     |                         |
| 552    | PI00543520    | Q92940              | TKT       | Transferrin receptor                                                                                                   | 60               | 0.489                                                                  | 0.359             | 1.33                                                       | False             | False                            | Active            | -                     |                         |

Supplementary Table 1 (cont.) | Hierarchical clustering analysis of proteins identified in active or inactive integrin adhesion complexes.

| #    | IPI Accession | UniProtKB Accession | Gene name | Protein name                                                                                  | Protein MW (kDa) | Relative abundance (mean normalized spectral count) × 10 <sup>3</sup> |                   | Fold enrichment (active/inactive) |                   | Specific enrichment <sup>†</sup> |                   | Cluster <sup>‡</sup> | Adhesome <sup>§</sup> | Hierarchical clustering |
|------|---------------|---------------------|-----------|-----------------------------------------------------------------------------------------------|------------------|-----------------------------------------------------------------------|-------------------|-----------------------------------|-------------------|----------------------------------|-------------------|----------------------|-----------------------|-------------------------|
|      |               |                     |           |                                                                                               |                  | Active integrin                                                       | Inactive integrin | Active integrin                   | Inactive integrin | Active integrin                  | Inactive integrin |                      |                       |                         |
| 240  | IP00219155    | P61353              | RPL27     | 60S ribosomal protein L27                                                                     | 16               | 5.261                                                                 | 2.899             | 1.81                              | False             | False                            | Active            |                      |                       |                         |
| 1202 | IP00179597    | P10249              | STAM1     | 150 kDa Spectrin alpha chain, erythrocyte                                                     | 17               | 0.517                                                                 | 0.284             | 1.82                              | False             | False                            | Active            |                      |                       |                         |
| 1659 | IP00071444    | Q8UNK3              | RML26L1   | 60S ribosomal protein L26-like 1                                                              | 17               | 1.653                                                                 | 0.910             | 1.82                              | False             | False                            | Active            |                      |                       |                         |
| 65   | IP00418880    | P61247              | RPL3A     | 40S ribosomal protein S3a                                                                     | 30               | 8.250                                                                 | 4.500             | 1.83                              | False             | False                            | Active            |                      |                       |                         |
| 493  | IP00301923    | Q90760              | CK2S1     | Isomorph of Cell division protein kinase 9                                                    | 45               | 1.010                                                                 | 0.551             | 1.83                              | False             | False                            | Active            |                      |                       |                         |
| 590  | IP00203344    | Q92797              | SYMPK     | Isomorph 1 of Sympkin                                                                         | 141              | 0.242                                                                 | 0.132             | 1.83                              | False             | False                            | Active            |                      |                       |                         |
| 385  | IP00305068    | Q94906              | PRPF6     | Pre-mRNA processing factor 6                                                                  | 107              | 0.539                                                                 | 0.294             | 1.83                              | False             | False                            | Active            |                      |                       |                         |
| 1090 | IP00215541    | Q12913              | PCSD2     | Isomorph 3 of PC1 domain-containing protein 2                                                 | 42               | 0.363                                                                 | 0.198             | 1.83                              | False             | False                            | Active            |                      |                       |                         |
| 390  | IP00018278    | Q71109              | H2AFV     | Histone H2A.V                                                                                 | 14               | 34.940                                                                | 19.125            | 1.83                              | False             | False                            | Active            |                      |                       |                         |
| 666  | IP00292059    | P49790              | NUP133    | Nuclear pore complex protein Nup133                                                           | 154              | 0.182                                                                 | 0.100             | 1.82                              | False             | False                            | Active            |                      |                       |                         |
| 1292 | IP00222074    | P62549              | SPTA1     | Isomorph 1 of Spectrin alpha chain, erythrocyte                                               | 280              | 0.036                                                                 | 0.020             | 1.80                              | False             | False                            | Active            |                      |                       |                         |
| 2131 | IP00292134    | P42566              | EP515     | Isomorph 1 of Epidermal growth factor receptor substrate 15                                   | 99               | 0.020                                                                 | 0.011             | 1.82                              | False             | False                            | Active            |                      |                       |                         |
| 280  | IP00016339    | Q14974              | KPNB1     | Importin subunit beta-1                                                                       | 97               | 0.952                                                                 | 0.542             | 1.76                              | False             | False                            | Active            |                      |                       |                         |
| 801  | IP00301923    | Q12913              | TRSP1     | Heat shock protein 75 kDa, mitochondrial                                                      | 80               | 1.293                                                                 | 0.738             | 1.75                              | False             | False                            | Active            |                      |                       |                         |
| 53   | IP00216592    | P07910              | HNRNPCC   | Isomorph C1 of Heterogeneous nuclear ribonucleoproteins C1/C2                                 | 32               | 9.569                                                                 | 5.411             | 1.77                              | False             | False                            | Active            |                      |                       |                         |
| 472  | IP00171159    | P25788              | PSMA3     | Isomorph 2 of Proteasome subunit alpha type-3                                                 | 28               | 1.731                                                                 | 0.983             | 1.76                              | False             | False                            | Active            |                      |                       |                         |
| 745  | IP00383046    | Q95056              | CMBL2     | Carboxymethylchitinase homolog 2                                                              | 28               | 0.818                                                                 | 0.464             | 1.76                              | False             | False                            | Active            |                      |                       |                         |
| 1384 | IP00001146    | P62312              | SLM6      | U6 snRNP-associated S-like protein Lsm6                                                       | 9                | 1.287                                                                 | 0.729             | 1.77                              | False             | False                            | Active            |                      |                       |                         |
| 545  | IP00555747    | Q13310              | PABPC4    | Isomorph 2 of Poly(ADP-ribose) binding protein 4                                              | 70               | 1.817                                                                 | 1.048             | 1.73                              | False             | False                            | Active            |                      |                       |                         |
| 1228 | IP00316179    | Q98075              | C1orf26   | Uncharacterized protein C1orf26                                                               | 32               | 0.520                                                                 | 0.295             | 1.73                              | False             | False                            | Active            |                      |                       |                         |
| 116  | IP00545723    | P17635              | RPL10     | 60S ribosomal protein L10                                                                     | 29               | 6.006                                                                 | 3.474             | 1.73                              | False             | False                            | Active            |                      |                       |                         |
| 1842 | IP00215911    | P27695              | AMEX1     | DNA-(apurinic or apyrimidinic site) lyase                                                     | 36               | 1.126                                                                 | 0.073             | 1.73                              | False             | False                            | Active            |                      |                       |                         |
| 1084 | IP00507746    | Q92066              | NLDC      | Nuclear migration protein nucleic                                                             | 38               | 0.362                                                                 | 0.207             | 1.75                              | False             | False                            | Active            |                      |                       |                         |
| 1810 | IP00010029    | Q15205              | PHF21     | Phosphoethanolamine 2                                                                         | 28               | 0.103                                                                 | 0.059             | 1.75                              | False             | False                            | Active            |                      |                       |                         |
| 20   | IP00186290    | P13639              | IEF2      | Elongation factor 2                                                                           | 95               | 1.664                                                                 | 0.955             | 1.75                              | False             | False                            | Active            |                      |                       |                         |
| 243  | IP00644127    | P41252              | EAR5      | Isomorph 1 of RNA polymerase, cytoplasmic                                                     | 145              | 0.725                                                                 | 0.289             | 2.51                              | False             | False                            | Active            |                      |                       |                         |
| 333  | IP00216230    | P42166              | TARPO     | Lamina-associated polypeptide 2, isoform alpha                                                | 99               | 0.458                                                                 | 0.187             | 2.50                              | False             | False                            | Active            |                      |                       |                         |
| 323  | IP00202822    | P51532              | SMARCA4   | SWI/SNF-related matrix-associated actin-dependent regulator of chromatin 4 isoform D          | 188              | 0.391                                                                 | 0.155             | 2.52                              | False             | False                            | Active            |                      |                       |                         |
| 579  | IP00505882    | P32322              | PKRC1     | Pyruvate-5-carboxylase reductase                                                              | 36               | 1.172                                                                 | 0.466             | 2.52                              | False             | False                            | Active            |                      |                       |                         |
| 746  | IP00303962    | P91024              | HSP95A    | HSP95 protein class A                                                                         | 82               | 0.773                                                                 | 0.307             | 2.52                              | False             | False                            | Active            |                      |                       |                         |
| 338  | IP00465044    | Q92958              | PRKCC2    | Protein RCK2                                                                                  | 56               | 1.283                                                                 | 0.516             | 2.49                              | False             | False                            | Active            |                      |                       |                         |
| 486  | IP00297982    | P41091              | EIF252    | Eukaryotic translation initiation factor 2 subunit 3                                          | 55               | 1.073                                                                 | 0.430             | 2.50                              | False             | False                            | Active            |                      |                       |                         |
| 1083 | IP0029624     | P43021              | NCAPD2    | Condensin complex subunit 1                                                                   | 22               | 0.147                                                                 | 0.052             | 2.47                              | False             | False                            | Active            |                      |                       |                         |
| 146  | IP00413324    | P18621              | RPL17     | 60S ribosomal protein L17                                                                     | 21               | 7.266                                                                 | 2.965             | 2.45                              | False             | False                            | Active            |                      |                       |                         |
| 191  | IP00003377    | Q13629              | SFRS7     | Isomorph 1 of Splicing factor, arginine/serine-rich 7                                         | 27               | 5.887                                                                 | 2.400             | 2.45                              | False             | False                            | Active            |                      |                       |                         |
| 606  | IP00251485    | P08610              | DIAPH1    | Isomorph 1 of Protein diaphanous homolog 1                                                    | 49               | 3.255                                                                 | 1.409             | 2.45                              | False             | False                            | Active            |                      |                       |                         |
| 654  | IP00296068    | Q99460              | PSMD1     | Isomorph 1 of 26S proteasome non-ATPase regulatory subunit 1                                  | 106              | 0.309                                                                 | 0.125             | 2.47                              | False             | False                            | Active            |                      |                       |                         |
| 11   | IP00081836    | Q96045              | HCT112AG  | Histone H2A type 1-H                                                                          | 14               | 68.037                                                                | 27.630            | 2.46                              | False             | False                            | Active            |                      |                       |                         |
| 295  | IP00310720    | P48543              | CTCS      | T11 complex protein 3 subunit epsilon                                                         | 11               | 1.558                                                                 | 0.633             | 2.46                              | False             | False                            | Active            |                      |                       |                         |
| 629  | IP00202520    | P34897              | SHMT2     | Serine hydroxymethyltransferase, mitochondrial                                                | 56               | 0.722                                                                 | 0.293             | 2.46                              | False             | False                            | Active            |                      |                       |                         |
| 779  | IP00206670    | Q15370              | TEC2B     | Translation elongation factor B polypeptide 2                                                 | 13               | 1.562                                                                 | 0.632             | 2.47                              | False             | False                            | Active            |                      |                       |                         |
| 1568 | IP00236588    | Q28214              | RPM252    | RNA-binding protein with multiple splicing 1                                                  | 22               | 0.147                                                                 | 0.060             | 2.45                              | False             | False                            | Active            |                      |                       |                         |
| 187  | IP00331691    | P32969              | RPL9      | 60S ribosomal protein L9                                                                      | 22               | 6.127                                                                 | 2.378             | 2.58                              | False             | False                            | Active            |                      |                       |                         |
| 260  | IP00216237    | Q9Y3U8              | RPL36     | 60S ribosomal protein L36                                                                     | 12               | 8.467                                                                 | 3.287             | 2.58                              | False             | False                            | Active            |                      |                       |                         |
| 1362 | IP00206297    | Q96097              | ASHPPTP   | L-aminoadipate-semialdehyde dehydrogenase (phosphoantithiopyridine) transferase               | 36               | 0.282                                                                 | 0.109             | 2.59                              | False             | False                            | Active            |                      |                       |                         |
| 202  | IP00291939    | P24683              | SMC1A     | Structural maintenance of chromosomes protein 1A                                              | 143              | 0.803                                                                 | 0.313             | 2.57                              | False             | False                            | Active            |                      |                       |                         |
| 524  | IP00021187    | Q9Y265              | RUVBL1    | Isomorph 1 of RuvB-like 1                                                                     | 50               | 0.989                                                                 | 0.385             | 2.57                              | False             | False                            | Active            |                      |                       |                         |
| 206  | IP00290770    | P49368              | CTC3      | Eukaryotic transcription TCP1, subunit 3 isoform B                                            | 60               | 1.760                                                                 | 0.686             | 2.57                              | False             | False                            | Active            |                      |                       |                         |
| 757  | IP00007074    | P49457              | YARS      | Tyrosyl-RNA synthetase, cytoplasmic                                                           | 62               | 0.183                                                                 | 0.071             | 2.62                              | False             | False                            | Active            |                      |                       |                         |
| 1018 | IP00222533    | P47813              | EIF1AX    | Eukaryotic translation initiation factor 1A, X-chromosomal                                    | 16               | 0.797                                                                 | 0.311             | 2.56                              | False             | False                            | Active            |                      |                       |                         |
| 735  | IP00567050    | Q15372              | EIF3H     | Eukaryotic translation initiation factor 3, subunit 3 gamma, 40kDa, isoform CRA_b             | 42               | 0.669                                                                 | 0.261             | 2.56                              | False             | False                            | Active            |                      |                       |                         |
| 1896 | IP00166293    | Q9N257              | HIST1H2B  | Histone H2B type 2-B                                                                          | 14               | 21.808                                                                | 8.531             | 2.56                              | False             | False                            | Active            |                      |                       |                         |
| 599  | IP00459672    | Q9UNM6              | HSPC027   | HSPC027                                                                                       | 43               | 0.988                                                                 | 0.389             | 2.54                              | False             | False                            | Active            |                      |                       |                         |
| 575  | IP00545737    | P30153              | PPP2R1A   | Serine/threonine-protein phosphatase 2A 65 kDa regulatory subunit A alpha isoform 1           | 65               | 0.668                                                                 | 0.264             | 2.53                              | False             | False                            | Active            |                      |                       |                         |
| 586  | IP00785611    | Q96097              | RPL29     | 9 kDa protein                                                                                 | 9                | 8.796                                                                 | 3.427             | 2.56                              | False             | False                            | Active            |                      |                       |                         |
| 715  | IP00419919    | P47914              | RPL29     | 60S ribosomal protein L29                                                                     | 18               | 1.348                                                                 | 0.530             | 2.54                              | False             | False                            | Active            |                      |                       |                         |
| 1371 | IP00404127    | Q9N922              | ASF1B     | Histone chaperone ASF1B                                                                       | 22               | 0.128                                                                 | 0.050             | 2.56                              | False             | False                            | Active            |                      |                       |                         |
| 42   | IP00450498    | Q96874              | PA2G4     | Poly (ADP-ribose) polymerase 1                                                                | 113              | 3.333                                                                 | 1.370             | 2.43                              | False             | False                            | Active            |                      |                       |                         |
| 417  | IP00219994    | P55060              | CSE1L     | Isomorph 3 of Exprin-2                                                                        | 108              | 0.871                                                                 | 0.359             | 2.43                              | False             | False                            | Active            |                      |                       |                         |
| 353  | IP00465248    | Q67373              | ENO1      | Isomorph alpha-enolase of Alpha-enolase                                                       | 47               | 1.613                                                                 | 0.667             | 2.42                              | False             | False                            | Active            |                      |                       |                         |
| 710  | IP00213723    | Q13526              | PNR1      | Peptidyl-prolyl-4-trans isomerase NIMA-interacting 1                                          | 12               | 0.741                                                                 | 0.292             | 2.53                              | False             | False                            | Active            |                      |                       |                         |
| 489  | IP00207208    | R30876              | POLR2B    | DNA-directed RNA polymerase II subunit RPB2                                                   | 134              | 0.354                                                                 | 0.146             | 2.42                              | False             | False                            | Active            |                      |                       |                         |
| 824  | IP00200042    | P43886              | PSMC4     | Isomorph 1 of 26S proteasome regulatory subunit 4B                                            | 47               | 0.526                                                                 | 0.217             | 2.42                              | False             | False                            | Active            |                      |                       |                         |
| 6    | IP00296337    | P78527              | PRKDC     | Isomorph 1 of Protein tyrosine kinase catalytic subunit                                       | 459              | 3.255                                                                 | 1.355             | 2.41                              | False             | False                            | Active            |                      |                       |                         |
| 584  | IP00006980    | Q9Y224              | C14orf166 | UPF0568 protein C14orf166                                                                     | 28               | 1.302                                                                 | 0.540             | 2.41                              | False             | False                            | Active            |                      |                       |                         |
| 324  | IP00219430    | Q9J0E7              | SMC3      | Structural maintenance of chromosomes protein 3                                               | 142              | 0.543                                                                 | 0.226             | 2.40                              | False             | False                            | Active            |                      |                       |                         |
| 585  | IP00297572    | Q28214              | AGR       | Intron binding protein aquarius                                                               | 102              | 0.213                                                                 | 0.089             | 2.39                              | False             | False                            | Active            |                      |                       |                         |
| 1662 | IP00306290    | Q43592              | XPOT      | Exportin-T                                                                                    | 110              | 0.036                                                                 | 0.015             | 2.40                              | False             | False                            | Active            |                      |                       |                         |
| 135  | IP00217975    | P20700              | LMNB1     | Lamin B1                                                                                      | 66               | 2.788                                                                 | 1.186             | 2.35                              | False             | False                            | Active            |                      |                       |                         |
| 46   | IP00215953    | Q28214              | DDX21     | Isomorph 1 of Nuclear RNA helicase 2                                                          | 87               | 4.355                                                                 | 1.849             | 2.36                              | False             | False                            | Active            |                      |                       |                         |
| 881  | IP00815770    | Q64993              | SMK3      | Isomorph 1 of Sorting nexin 3                                                                 | 19               | 1.020                                                                 | 0.433             | 2.36                              | False             | False                            | Active            |                      |                       |                         |
| 67   | IP00299573    | P62424              | RPL7A     | 60S ribosomal protein L7a                                                                     | 30               | 8.757                                                                 | 3.694             | 2.37                              | False             | False                            | Active            |                      |                       |                         |
| 129  | IP00299900    | Q9J080              | PA2G4     | Protein tyrosine kinase catalytic subunit 2G4                                                 | 44               | 4.443                                                                 | 1.878             | 2.37                              | False             | False                            | Active            |                      |                       |                         |
| 1172 | IP00013100    | Q13616              | CUL1      | Protein associated with Cullin 1                                                              | 90               | 0.116                                                                 | 0.049             | 2.37                              | False             | False                            | Active            |                      |                       |                         |
| 949  | IP00215610    | Q00013              | SFBP2     | 55 kDa erythrocyte membrane protein                                                           | 52               | 0.428                                                                 | 0.185             | 2.31                              | False             | False                            | Active            |                      |                       |                         |
| 793  | IP00212845    | Q15020              | SPTBN2    | Isomorph 1 of Spectrin beta chain, brain 2                                                    | 271              | 0.023                                                                 | 0.010             | 2.30                              | False             | False                            | Active            |                      |                       |                         |
| 1221 | IP00294979    | P49690              | RAN       | Ran GTPase-activating protein 1                                                               | 64               | 0.241                                                                 | 0.050             | 2.35                              | False             | False                            | Active            |                      |                       |                         |
| 106  | IP00247583    | P46778              | RPL21     | 60S ribosomal protein L21                                                                     | 19               | 7.413                                                                 | 3.235             | 2.29                              | False             | False                            | Active            |                      |                       |                         |
| 959  | IP00202567    | Q98779              | SRAPB2    | U2 small nuclear ribonucleoprotein B'                                                         | 25               | 1.535                                                                 | 0.670             | 2.29                              | False             | False                            | Active            |                      |                       |                         |
| 607  | IP00202127    | Q17694              | PNR1      | Peptidyl-prolyl-4-trans isomerase NIMA-interacting 1                                          | 68               | 0.414                                                                 | 0.181             | 2.31                              | False             | False                            | Active            |                      |                       |                         |
| 1392 | IP00219839    | Q63683              | HMC2      | Isomorph 2 of Hypermethylated in cancer 2 protein                                             | 64               | 0.178                                                                 | 0.077             | 2.31                              | False             | False                            | Active            |                      |                       |                         |
| 396  | IP00315119    | P43658              | DMNT1     | Isomorph 1 of DNA (cytosine-5)-methyltransferase 1                                            | 190              | 0.290                                                                 | 0.127             | 2.28                              | False             | False                            | Active            |                      |                       |                         |
| 1429 | IP00181636    | Q98801              | HIST1H2A  | Isomorph 2 of Integrator complex subunit 1                                                    | 118              | 0.084                                                                 | 0.028             | 2.29                              | False             | False                            | Active            |                      |                       |                         |
| 1605 | IP00294402    | Q9J080              | OCRL3     | Isomorph 1 of Origin recognition complex subunit 3                                            | 82               | 0.062                                                                 | 0.027             | 2.30                              | False             | False                            | Active            |                      |                       |                         |
| 163  | IP00297211    | Q60204              | SMARCA5   | SWI/SNF-related matrix-associated actin-dependent regulator of chromatin subfamily A member 5 | 122              | 1.185                                                                 | 0.421             | 2.81                              | False             | False                            | Active            |                      |                       |                         |
| 763  | IP00014042    | Q95133              | IMPOT2    | Importin-                                                                                     |                  |                                                                       |                   |                                   |                   |                                  |                   |                      |                       |                         |

Supplementary Table 1 (cont.) | Hierarchical clustering analysis of proteins identified in active or inactive integrin adhesion complexes.

| #    | API Accession | UniProtKB Accession | Gene name                                                    | Protein name                                                                                                 | Relative abundance (mean normalized spectral counts) × 10 <sup>3</sup> |                 |                   | Fold enrichment (active/inactive) |                   | Specific enrichment <sup>†</sup> |                   | Adhesome <sup>‡</sup> | Hierarchical clustering |
|------|---------------|---------------------|--------------------------------------------------------------|--------------------------------------------------------------------------------------------------------------|------------------------------------------------------------------------|-----------------|-------------------|-----------------------------------|-------------------|----------------------------------|-------------------|-----------------------|-------------------------|
|      |               |                     |                                                              |                                                                                                              | MW (kDa)                                                               | Active integrin | Inactive integrin | Active integrin                   | Inactive integrin | Active integrin                  | Inactive integrin |                       |                         |
| 371  | IP0009560     | Q13691              | INMT                                                         | Isomerase 1 of Mitochondrial inner membrane protein                                                          | 84                                                                     | 0.774           | 0.386             | 2.01                              | False             | False                            | Active            |                       |                         |
| 55   | IP0021700     | P62701              | RPS4                                                         | 60S ribosomal protein S4, X isoform                                                                          | 30                                                                     | 9.643           | 4.785             | 2.02                              | False             | False                            | Active            |                       |                         |
| 9    | IP0030313     | Q93709              | HIST1H2BH                                                    | Histone H2B type 1-H                                                                                         | 14                                                                     | 77.372          | 38.470            | 2.01                              | False             | False                            | Active            |                       |                         |
| 455  | IP0016387     | Q14658              | FSCN1                                                        | Fascin                                                                                                       | 55                                                                     | 0.914           | 0.454             | 2.01                              | False             | False                            | Active            |                       |                         |
| 1565 | IP0002704     | P49642              | PRM1                                                         | DNA primase small subunit                                                                                    | 50                                                                     | 0.079           | 0.039             | 2.03                              | False             | False                            | Active            |                       |                         |
| 94   | IP0017297     | P43243              | MATR3                                                        | Matrin-3                                                                                                     | 95                                                                     | 2.016           | 0.979             | 2.06                              | False             | False                            | Active            |                       |                         |
| 556  | IP00047330    | Q9Y3A5              | SBD5                                                         | Ribosome maturation protein SBD5                                                                             | 29                                                                     | 1.463           | 0.712             | 2.05                              | False             | False                            | Active            |                       |                         |
| 677  | IP00031522    | P49293              | HADNA                                                        | Trifunctional enzyme subunit alpha, mitochondrial                                                            | 26                                                                     | 0.415           | 0.205             | 2.06                              | False             | False                            | Active            |                       |                         |
| 501  | IP00170692    | Q9P0L0              | VAPA                                                         | Isomerase 1 of Vesicle-associated membrane protein-associated protein A                                      | 28                                                                     | 1.780           | 0.862             | 2.06                              | False             | False                            | Active            |                       |                         |
| 1430 | IP00003824    | Q13356              | PNL2                                                         | Isomerase 1 of Peptidyl prolyl cis-trans isomerase-like 2                                                    | 59                                                                     | 0.116           | 0.056             | 2.07                              | False             | False                            | Active            |                       |                         |
| 185  | IP0021772     | P29537              | RPL5                                                         | 60S ribosomal protein L5                                                                                     | 28                                                                     | 4.513           | 2.263             | 2.05                              | False             | False                            | Active            |                       |                         |
| 655  | IP00220528    | P62306              | SNRPF                                                        | Small nuclear ribonucleoprotein F                                                                            | 10                                                                     | 4.132           | 2.017             | 2.05                              | False             | False                            | Active            |                       |                         |
| 619  | IP00019912    | P51659              | HSD17B4                                                      | Peroxisomal multifunctional enzyme type 2                                                                    | 80                                                                     | 0.482           | 0.236             | 2.04                              | False             | False                            | Active            |                       |                         |
| 1171 | IP00205821    | P49912              | LEB3                                                         | Isomerase 1 of Alpha-1,6-glucosylase 3                                                                       | 113                                                                    | 0.084           | 0.042             | 2.05                              | False             | False                            | Active            |                       |                         |
| 303  | IP00021700    | P12004              | PCNA                                                         | Proliferating cell nuclear antigen                                                                           | 29                                                                     | 2.652           | 1.274             | 2.08                              | False             | False                            | Active            |                       |                         |
| 179  | IP00013917    | P25398              | RPS12                                                        | 40S ribosomal protein S12                                                                                    | 15                                                                     | 9.778           | 4.702             | 2.08                              | True              | False                            | Active            |                       |                         |
| 618  | IP00022809    | P62273              | RPS29                                                        | 40S ribosomal protein S29                                                                                    | 7                                                                      | 5.071           | 2.438             | 2.08                              | False             | False                            | Active            |                       |                         |
| 132  | IP00046161    | Q13838              | BAT1                                                         | Isomerase 1 of Spliceosome RNA helicase BAT1                                                                 | 49                                                                     | 3.088           | 1.480             | 2.09                              | False             | False                            | Active            |                       |                         |
| 1009 | IP00006052    | Q9UHV9              | PFND2                                                        | Prefoldin subunit 2                                                                                          | 17                                                                     | 1.237           | 0.593             | 2.09                              | False             | False                            | Active            |                       |                         |
| 1046 | IP00024245    | P45880              | VDAC2                                                        | Isomerase 2 of Voltage-dependent anion-selective channel protein 2                                           | 30                                                                     | 0.497           | 0.238             | 2.09                              | False             | False                            | Active            |                       |                         |
| 990  | IP00038424    | Q12650              | GART                                                         | GARS-GART-GART (Fragment)                                                                                    | 18                                                                     | 1.145           | 0.552             | 2.07                              | False             | False                            | Active            |                       |                         |
| 1134 | IP00163084    | Q9HC27              | XAB2                                                         | Pre-mRNA-splicing factor XFP1                                                                                | 100                                                                    | 1.335           | 0.665             | 2.08                              | False             | False                            | Active            |                       |                         |
| 1084 | IP00007163    | Q10J45              | LSM7                                                         | U6 snRNA-associated Sm-like protein LSM7                                                                     | 12                                                                     | 1.020           | 0.492             | 2.07                              | False             | False                            | Active            |                       |                         |
| 227  | IP00013088    | Q43707              | ACTN4                                                        | Alpha-actinin-4                                                                                              | 105                                                                    | 1.376           | 0.639             | 2.18                              | False             | False                            | Active            | YES                   |                         |
| 213  | IP00012345    | Q13247              | SFRS6                                                        | Isomerase 1 of Splicing factor, arginine/serine-rich 6                                                       | 40                                                                     | 2.658           | 1.217             | 2.18                              | False             | False                            | Active            |                       |                         |
| 474  | IP00016413    | P68400              | CSM2A1                                                       | CSM2A1                                                                                                       | 46                                                                     | 1.124           | 0.515             | 2.18                              | False             | False                            | Active            |                       |                         |
| 373  | IP00379044    | Q9N127              | NUP93                                                        | Nuclear pore complex protein Nup93                                                                           | 95                                                                     | 0.328           | 0.151             | 2.17                              | False             | False                            | Active            |                       |                         |
| 1192 | IP00022879    | Q9Y3D8              | AK6                                                          | Adenylyl kinase isoenzyme 6                                                                                  | 20                                                                     | 0.623           | 0.287             | 2.17                              | False             | False                            | Active            |                       |                         |
| 1073 | IP00012369    | Q13257              | MAD2L1                                                       | Mitotic spindle assembly checkpoint protein MAD2A                                                            | 24                                                                     | 0.537           | 0.247             | 2.17                              | False             | False                            | Active            |                       |                         |
| 162  | IP00021270    | P32643              | RPL26                                                        | 60S ribosomal protein L26                                                                                    | 18                                                                     | 7.171           | 3.254             | 2.20                              | False             | False                            | Active            |                       |                         |
| 226  | IP00022774    | P55072              | VCP                                                          | Transitional endoplasmic reticulum ATPase                                                                    | 89                                                                     | 1.301           | 0.591             | 2.20                              | False             | False                            | Active            |                       |                         |
| 1240 | IP00413995    | Q80879              | UGL2G2                                                       | Golgii autophagy, golgin subfamily A, 2                                                                      | 113                                                                    | 0.086           | 0.039             | 2.21                              | False             | False                            | Active            |                       |                         |
| 1456 | IP00013598    | Q9BVC5              | Actn5                                                        | Actinin-5                                                                                                    | 26                                                                     | 0.252           | 0.114             | 2.21                              | False             | False                            | Active            |                       |                         |
| 1747 | IP00215381    | Q43678              | NADH dehydrogenase [ubiquinone] 1 alpha subcomplex subunit 2 | 11                                                                                                           | 0.939                                                                  | 0.420           | 2.20              | False                             | False             | Active                           |                   |                       |                         |
| 1495 | IP00023287    | Q9Y3B4              | SFB14                                                        | Pre-mRNA branch site protein p14                                                                             | 15                                                                     | 2.761           | 1.243             | 2.22                              | False             | False                            | Active            |                       |                         |
| 230  | IP00029779    | P73781              | CTC2                                                         | T-complex protein 1 subunit beta                                                                             | 52                                                                     | 0.299           | 0.048             | 2.21                              | False             | False                            | Active            |                       |                         |
| 1240 | IP00011528    | Q95048              | CSF1                                                         | Cleavage stimulation factor subunit 1                                                                        | 48                                                                     | 0.182           | 0.082             | 2.22                              | False             | False                            | Active            |                       |                         |
| 495  | IP00064777    | Q00303              | EIF3F                                                        | HC1784554, isoform CRA_a                                                                                     | 39                                                                     | 1.405           | 0.631             | 2.23                              | False             | False                            | Active            |                       |                         |
| 355  | IP00007163    | Q10J45              | HSP90                                                        | Stress 70 protein, mitochondrial                                                                             | 78                                                                     | 1.577           | 0.713             | 2.23                              | False             | False                            | Active            |                       |                         |
| 1773 | IP00023287    | Q9Y3D3              | MRPS16                                                       | 28S ribosomal protein S16, mitochondrial                                                                     | 15                                                                     | 0.293           | 0.131             | 2.24                              | False             | False                            | Active            |                       |                         |
| 1032 | IP00029728    | P18074              | ERCC2                                                        | TFII basal transcription factor complex helicase subunit                                                     | 87                                                                     | 0.128           | 0.057             | 2.25                              | False             | False                            | Active            |                       |                         |
| 275  | IP00078781    | Q9N259              | NUP205                                                       | Nuclear pore complex protein Nup205                                                                          | 103                                                                    | 0.389           | 0.188             | 2.12                              | False             | False                            | Active            |                       |                         |
| 886  | IP00337307    | Q8Z629              | TMT2A                                                        | Isomerase 1 of rRNA (uracil-5)-methyltransferase homolog A (Fragment)                                        | 69                                                                     | 0.280           | 0.132             | 2.12                              | False             | False                            | Active            |                       |                         |
| 797  | IP00073602    | Q58K66              | EXOC56                                                       | Exosome complex exocyst MTR3                                                                                 | 28                                                                     | 1.016           | 0.479             | 2.12                              | False             | False                            | Active            |                       |                         |
| 938  | IP00228206    | Q75121              | ZC3H11A                                                      | Zinc finger CCH domain-containing protein 11A                                                                | 85                                                                     | 0.105           | 0.050             | 2.10                              | False             | False                            | Active            |                       |                         |
| 976  | IP00010030    | Q10460              | YTHDC2                                                       | Probable ATP-dependent RNA helicase YTHDC2                                                                   | 160                                                                    | 0.083           | 0.039             | 2.13                              | False             | False                            | Active            |                       |                         |
| 896  | IP00008922    | Q11629              | IFTM2                                                        | Interferon-induced transmembrane protein 2                                                                   | 15                                                                     | 1.646           | 0.783             | 2.10                              | False             | False                            | Active            |                       |                         |
| 572  | IP00064271    | P52692              | EF1D                                                         | Isomerase 2 of Elongation factor 1 delta                                                                     | 17                                                                     | 0.716           | 0.339             | 2.11                              | False             | False                            | Active            |                       |                         |
| 571  | IP00010305    | Q95637              | EIF5                                                         | Eukaryotic translation initiation factor 5                                                                   | 27                                                                     | 1.667           | 0.781             | 2.11                              | False             | False                            | Active            |                       |                         |
| 1521 | IP00022334    | Q04181              | ORIT1                                                        | Ornithine aminotransferase, mitochondrial                                                                    | 49                                                                     | 0.113           | 0.054             | 2.09                              | False             | False                            | Active            |                       |                         |
| 1254 | IP00039262    | P11177              | PDB9                                                         | Isomerase 1 of Pyruvate dehydrogenase E1 component subunit beta, mitochondrial                               | 39                                                                     | 0.321           | 0.152             | 2.11                              | False             | False                            | Active            |                       |                         |
| 1694 | IP00013088    | Q43707              | ACTN4                                                        | Isomerase 1 of Actinin-like protein N2A                                                                      | 78                                                                     | 0.482           | 0.223             | 2.13                              | False             | False                            | Active            |                       |                         |
| 334  | IP00415258    | H09429              | HMG81                                                        | High mobility group protein B1                                                                               | 25                                                                     | 4.580           | 2.144             | 2.14                              | False             | False                            | Active            |                       |                         |
| 1922 | IP00292071    | Q95985              | TOP3B                                                        | Isomerase 1 of DNA topoisomerase 3-beta-1                                                                    | 97                                                                     | 0.029           | 0.014             | 2.07                              | False             | False                            | Active            |                       |                         |
| 729  | IP00031443    | Q94905              | YPC1                                                         | Eukaryotic translation initiation factor 3 subunit K                                                         | 25                                                                     | 1.136           | 0.526             | 2.16                              | False             | False                            | Active            |                       |                         |
| 1130 | IP00005179    | Q15160              | ROP13C                                                       | Isomerase 1 of GNA-DIRECTED RNA polymerases I and III subunit RPA1C                                          | 39                                                                     | 0.329           | 0.152             | 2.16                              | False             | False                            | Active            |                       |                         |
| 1474 | IP00024742    | Q14949              | UCDCK9                                                       | Cytochrome b-c1 complex subunit 8                                                                            | 10                                                                     | 0.705           | 0.328             | 2.15                              | False             | False                            | Active            |                       |                         |
| 103  | IP00045248    | Q97474              | NRX1                                                         | Isomerase 1 of Nucleophosmin 1                                                                               | 33                                                                     | 0.810           | 0.375             | 2.15                              | False             | False                            | Active            |                       |                         |
| 103  | IP000783271   | P42704              | LRPPRC                                                       | Leucine-rich PPR motif-containing protein, mitochondrial                                                     | 158                                                                    | 1.547           | 0.494             | 3.13                              | True              | False                            | Active            |                       |                         |
| 83   | IP00021088    | P46781              | RPS9                                                         | 40S ribosomal protein S9                                                                                     | 23                                                                     | 9.659           | 3.080             | 3.14                              | True              | False                            | Active            |                       |                         |
| 307  | IP00011569    | Q13085              | ACACA                                                        | Isomerase 1 of Acetyl-CoA carboxylase 1                                                                      | 26                                                                     | 1.014           | 0.463             | 2.11                              | False             | False                            | Active            |                       |                         |
| 1341 | IP00009659    | Q9N0G5              | RPRD1B                                                       | Regulation of nuclear pre-mRNA domain-containing protein 1B                                                  | 37                                                                     | 0.387           | 0.124             | 3.12                              | True              | False                            | Active            |                       |                         |
| 1534 | IP00017669    | Q96963              | SMARCC1                                                      | Isomerase 1 of SWI/SNF-related matrix-associated actin-dependent regulator of chromatin subfamily E member 1 | 47                                                                     | 0.175           | 0.056             | 3.13                              | False             | False                            | Active            |                       |                         |
| 184  | IP00045969    | Q10294              | MYL1                                                         | Cytoskeletal myosin I heavy chain 1                                                                          | 53                                                                     | 2.096           | 0.948             | 2.21                              | False             | False                            | Active            |                       |                         |
| 786  | IP00038492    | P12829              | MYL4                                                         | Myosin light chain 4                                                                                         | 22                                                                     | 1.329           | 0.429             | 3.10                              | True              | False                            | Active            |                       |                         |
| 977  | IP00022793    | P55084              | HADHB                                                        | Trifunctional enzyme subunit beta, mitochondrial                                                             | 51                                                                     | 0.460           | 0.148             | 3.11                              | True              | False                            | Active            |                       |                         |
| 265  | IP00021266    | P62750              | RPL23A                                                       | 60S ribosomal protein L23                                                                                    | 18                                                                     | 6.577           | 3.127             | 3.13                              | False             | False                            | Active            |                       |                         |
| 707  | IP00030078    | Q15269              | PWP2                                                         | Periodic tryptophan protein 2 homolog                                                                        | 102                                                                    | 0.294           | 0.096             | 3.06                              | False             | False                            | Active            |                       |                         |
| 403  | IP00006932    | Q9Y3B3              | LUCLT2                                                       | RNA-binding protein Luc2-like 2                                                                              | 54                                                                     | 1.008           | 0.347             | 3.08                              | True              | False                            | Active            |                       |                         |
| 1694 | IP00013088    | Q43707              | ACTN4                                                        | Cytochrome c oxidase subunit 6B1                                                                             | 103                                                                    | 0.403           | 0.133             | 3.03                              | False             | False                            | Active            |                       |                         |
| 40   | IP00018793    | P11388              | TOP2A                                                        | Isomerase 3 of DNA topoisomerase 2-alpha                                                                     | 179                                                                    | 2.188           | 0.688             | 3.18                              | False             | False                            | Active            |                       |                         |
| 102  | IP00019502    | P35579              | MTH9                                                         | Isomerase 1 of Myosin-9                                                                                      | 227                                                                    | 1.251           | 0.393             | 3.18                              | True              | False                            | Active            | YES                   |                         |
| 64   | IP00046203    | P49338              | NCL                                                          | Nucleolin                                                                                                    | 77                                                                     | 7.219           | 2.275             | 3.17                              | False             | False                            | Active            |                       |                         |
| 662  | IP00015790    | Q5YVX3              | ECM39                                                        | KAM488B protein                                                                                              | 224                                                                    | 0.137           | 0.043             | 3.19                              | False             | False                            | Active            |                       |                         |
| 729  | IP00029345    | Q5UJ90              | RIF1                                                         | Isomerase 1 of Telomerase-associated protein RIF1                                                            | 174                                                                    | 0.093           | 0.029             | 3.21                              | False             | False                            | Active            |                       |                         |
| 304  | IP00039598    | P62910              | RPL32                                                        | 60S ribosomal protein L32                                                                                    | 28                                                                     | 5.496           | 1.712             | 3.21                              | True              | False                            | Active            |                       |                         |
| 392  | IP00021229    | Q03041              | H0189                                                        | Vglin                                                                                                        | 141                                                                    | 0.476           | 0.148             | 3.22                              | False             | False                            | Active            |                       |                         |
| 836  | IP00024284    | Q92973              | TNPO1                                                        | Isomerase 1 of Transporin-1                                                                                  | 102                                                                    | 0.270           | 0.084             | 3.21                              | False             | False                            | Active            |                       |                         |
| 1372 | IP00039736    | Q89177              | ZC3H14                                                       | Isomerase 1 of Zinc finger CCH domain-containing protein 14                                                  | 83                                                                     | 0.076           | 0.024             | 3.17                              | False             | False                            | Active            |                       |                         |
| 600  | IP00013536    | Q92955              | DMG1                                                         | Downstreamless-regulated GTP-binding protein 1                                                               | 41                                                                     | 1.070           | 0.346             | 3.08                              | False             | False                            | Active            |                       |                         |
| 1263 | IP00079373    | Q8N590              | DOC8                                                         | Isomerase 1 of Dedicator of cytokinesis protein 8                                                            | 239                                                                    | 0.041           | 0.012             | 3.42                              | False             | False                            | Active            |                       |                         |
| 813  | IP00013536    | Q96753              | TFM3                                                         | Isomerase 2 of Tropomyosin alpha-3 chain                                                                     | 29                                                                     | 0.824           | 0.254             | 3.24                              | False             | False                            | Active            |                       |                         |
| 932  | IP00032633    | Q14628              | TAF5                                                         | Thousand RNA synthetase, cytoplasmic                                                                         | 105                                                                    | 0.095           | 0.026             | 3.25                              | False             | False                            | Active            |                       |                         |
| 598  | IP00025418    | Q02388              | COL7A1                                                       | Isomerase 1 of Collagen alpha-1(VII) chain                                                                   | 295                                                                    | 0.029           | 0.009             | 3.22                              | False             | False                            | Active            |                       |                         |
| 1599 | IP00034379    | Q9N383              | MRP43                                                        | Mitochondrial ribosomal protein L34 (MRP43), transcript variant 4                                            | 29                                                                     | 0.295           | 0.091             | 3.24                              | False             | False                            | Active            |                       |                         |
| 55   | IP00024067    | Q9N043              | CLTC                                                         | Isomerase 1 of Clathrin heavy chain 1                                                                        | 103                                                                    | 0.011           | 0.003             | 3.01                              | False             | False                            | Active            |                       |                         |
| 169  | IP00009342    | P46640              | IQGAP1                                                       | Ras GTPase-activating-like protein IQGAP1                                                                    | 189                                                                    | 0.800           | 0.265             | 3.02                              | False             | False                            | Active            |                       |                         |
| 362  | IP00041733    | Q12123              | DNK90                                                        | Isomerase 1 of Putative ATP-dependent RNA helicase DNK90                                                     | 134                                                                    | 0.585           | 0.194             | 3.02                              | False             | False                            | Active            |                       |                         |
| 182  | IP00079566    | P57371              | RPL24                                                        | 19 kDa ribosomal protein                                                                                     | 19                                                                     | 8.188           | 2.748             | 3.00                              | False             | False                            | Active            |                       |                         |
| 290  | IP00029861    | Q14980              |                                                              |                                                                                                              |                                                                        |                 |                   |                                   |                   |                                  |                   |                       |                         |



Supplementary Table 1 (cont.) | Hierarchical clustering analysis of proteins identified in active or inactive integrin adhesion complexes.

| #    | API Accession | UniProtKB Accession | Gene name | Protein name                                                                   | Relative abundance (mean normalized spectral count) × 10 <sup>3</sup> |                                                                       | Fold enrichment (active/inactive) |        | Specific enrichment <sup>†</sup> |        | Cluster <sup>‡</sup> | Adhesome <sup>§</sup> | Hierarchical clustering |
|------|---------------|---------------------|-----------|--------------------------------------------------------------------------------|-----------------------------------------------------------------------|-----------------------------------------------------------------------|-----------------------------------|--------|----------------------------------|--------|----------------------|-----------------------|-------------------------|
|      |               |                     |           |                                                                                | Protein MW (kDa)                                                      | Relative abundance (mean normalized spectral count) × 10 <sup>3</sup> | Fold enrichment (active/inactive) | Active | Inactive                         | Active |                      |                       |                         |
| 1136 | PI0001297     | Q13442              | PODPI     | 28 kDa heat- and acid-stable phosphoprotein                                    | 21                                                                    | 0.686                                                                 | 0.188                             | 3.65   | False                            | False  | Active               | -                     | -                       |
| 621  | PI0002177     | Q17340              | PI3K      | Programmed cell death protein 6                                                | 22                                                                    | 1.899                                                                 | 0.158                             | 9.67   | True                             | False  | Active               | -                     | -                       |
| 867  | PI0017843     | P40603              | RCOL      | ATP-dependent DNA helicase Q1                                                  | 73                                                                    | 0.248                                                                 | 0.068                             | 3.65   | False                            | False  | Active               | -                     | -                       |
| 173  | PI0030017     | Q9H040              | NAT10     | N-acetyltransferase 10                                                         | 116                                                                   | 1.321                                                                 | 0.362                             | 3.65   | False                            | False  | Active               | -                     | -                       |
| 1060 | PI0000964     | Q9R068              | UBQL      | ubiquitin-specific protease 9, N-linked isoform 4                              | 290                                                                   | 0.042                                                                 | 0.011                             | 3.82   | True                             | False  | Active               | -                     | -                       |
| 1103 | PI0003160     | Q95602              | POB1A     | DNA-directed RNA polymerase I subunit RPA1                                     | 195                                                                   | 0.062                                                                 | 0.017                             | 3.65   | False                            | False  | Active               | -                     | -                       |
| 1189 | PI0030630     | Q9H559              | PDHA1     | Mitochondrial PDHA1                                                            | 46                                                                    | 0.399                                                                 | 0.109                             | 3.66   | False                            | False  | Active               | -                     | -                       |
| 1255 | PI0002083     | Q96622              | GPT1      | G1 to S phase transition 1 isoform 2                                           | 65                                                                    | 0.058                                                                 | 0.016                             | 2.63   | False                            | False  | Active               | -                     | -                       |
| 78   | PI0005001     | P39023              | RPL3      | 60S ribosomal protein L3                                                       | 46                                                                    | 5.318                                                                 | 1.393                             | 3.82   | True                             | False  | Active               | -                     | -                       |
| 199  | PI0002429     | Q9H583              | HEAT1     | HEAT repeat-containing protein 1                                               | 242                                                                   | 0.529                                                                 | 0.138                             | 3.83   | False                            | False  | Active               | -                     | -                       |
| 1175 | PI0002103     | P15104              | HDRX      | Histone H2A                                                                    | 15                                                                    | 19.260                                                                | 5.033                             | 3.83   | False                            | False  | Active               | -                     | -                       |
| 1420 | PI0002513     | P24539              | ATP5F1    | ATP synthase subunit b, mitochondrial                                          | 29                                                                    | 0.261                                                                 | 0.068                             | 3.84   | False                            | False  | Active               | -                     | -                       |
| 317  | PI0040022     | Q14690              | PCDD11    | Protein RPP5 homolog                                                           | 209                                                                   | 0.374                                                                 | 0.099                             | 3.78   | False                            | False  | Active               | -                     | -                       |
| 475  | PI0002125     | P29748              | FEN1      | Flap endonuclease 1                                                            | 43                                                                    | 1.273                                                                 | 0.336                             | 3.79   | False                            | False  | Active               | -                     | -                       |
| 577  | PI0000971     | Q93252              | LMNB2     | Lamin-B2                                                                       | 70                                                                    | 0.860                                                                 | 0.227                             | 3.79   | True                             | False  | Active               | -                     | -                       |
| 720  | PI0003240     | Q9Y933              | LSM2      | U6 snRNA-associated 5m-like protein LSM2                                       | 11                                                                    | 2.939                                                                 | 0.776                             | 3.79   | True                             | False  | Active               | -                     | -                       |
| 1537 | PI0003856     | P36033              | ATP9A1E1  | V-type proton ATPase subunit E 1                                               | 26                                                                    | 0.285                                                                 | 0.076                             | 3.75   | False                            | False  | Active               | -                     | -                       |
| 1589 | PI0000594     | Q9U466              | DDX20     | Probable ATP-dependent RNA helicase DDX20                                      | 92                                                                    | 0.081                                                                 | 0.021                             | 3.86   | False                            | False  | Active               | -                     | -                       |
| 93   | PI0074268     | P12270              | GTR       | Nucleoprotein TR                                                               | 267                                                                   | 0.920                                                                 | 0.228                             | 4.04   | True                             | False  | Active               | -                     | -                       |
| 1045 | PI0001826     | Q9Y050              | TOP2      | Aspartate aminotransferase, mitochondrial                                      | 47                                                                    | 0.505                                                                 | 0.126                             | 4.01   | False                            | False  | Active               | -                     | -                       |
| 75   | PI0000136     | Q14980              | NLMA1     | Isoform 3 of Nuclear mitotic apparatus protein 1                               | 237                                                                   | 1.088                                                                 | 0.274                             | 3.97   | True                             | False  | Active               | -                     | -                       |
| 312  | PI0000578     | Q01130              | SFRS2     | Splicing factor, arginine/serine-rich 2                                        | 25                                                                    | 2.915                                                                 | 0.735                             | 3.97   | True                             | False  | Active               | -                     | -                       |
| 935  | PI0009707     | Q17513              | KIAA0664  | Protein KIAA0664                                                               | 147                                                                   | 1.154                                                                 | 0.293                             | 3.95   | False                            | False  | Active               | -                     | -                       |
| 685  | PI0000071     | Q17845              | SRF12     | Isoform 3 of Splicing factor, arginine/serine-rich 13A                         | 22                                                                    | 1.303                                                                 | 0.328                             | 3.97   | True                             | False  | Active               | -                     | -                       |
| 1544 | PI0001385     | P31949              | S100A11   | Protein S100-A11                                                               | 12                                                                    | 0.648                                                                 | 0.164                             | 3.95   | False                            | False  | Active               | -                     | -                       |
| 686  | PI00024919    | P30448              | PHOX3     | Thioredoxin-dependent peroxide reductase, mitochondrial                        | 28                                                                    | 1.216                                                                 | 0.305                             | 3.99   | True                             | False  | Active               | -                     | -                       |
| 911  | PI00029276    | P41224              | MBF       | Macrophage migration inhibitory factor                                         | 12                                                                    | 1.062                                                                 | 0.262                             | 3.99   | False                            | False  | Active               | -                     | -                       |
| 702  | PI00029200    | Q8WVY3              | PPP31     | Isoform 1 of U4/U5 snRNP ribonucleoprotein Prp31                               | 55                                                                    | 0.602                                                                 | 0.155                             | 3.88   | True                             | False  | Active               | -                     | -                       |
| 450  | PI0000882     | P54886              | ALDH18A1  | Isoform Long of Delta 1-pyridoxal-5-carboxylate synthetase                     | 87                                                                    | 0.796                                                                 | 0.204                             | 3.90   | True                             | False  | Active               | -                     | -                       |
| 1595 | PI0015911     | Q14580              | DIMC9     | Isoform 4 of Death-inducing cell factor 9                                      | 12                                                                    | 1.078                                                                 | 0.271                             | 3.95   | False                            | False  | Active               | -                     | -                       |
| 1116 | PI00078096    | Q7L106              | BZW1      | Isoform 1 of Basic leucine zipper and W2 domain-containing protein 1           | 48                                                                    | 0.480                                                                 | 0.123                             | 3.90   | True                             | False  | Active               | -                     | -                       |
| 281  | PI00029750    | P62847              | RPS24     | Isoform 1 of 40S ribosomal protein S24                                         | 15                                                                    | 7.308                                                                 | 1.669                             | 4.38   | True                             | False  | Active               | -                     | -                       |
| 158  | PI0002089     | Q79531              | SFRS1     | Splicing factor 38 subunit 1                                                   | 147                                                                   | 1.037                                                                 | 0.273                             | 3.85   | True                             | False  | Active               | -                     | -                       |
| 439  | PI0000675     | Q9R028              | DDX23     | Eukaryotic ATP-dependent RNA helicase DDX23                                    | 96                                                                    | 0.636                                                                 | 0.146                             | 4.36   | True                             | False  | Active               | -                     | -                       |
| 123  | PI0002012     | Q14152              | EF3A      | Evolutionary transition initiation factor 3 subunit A                          | 167                                                                   | 1.181                                                                 | 0.277                             | 4.26   | True                             | False  | Active               | -                     | -                       |
| 497  | PI0002027     | Q15467              | SMC2      | Isoform 1 of Structural maintenance of chromosomes protein 2                   | 136                                                                   | 0.205                                                                 | 0.051                             | 4.29   | True                             | False  | Active               | -                     | -                       |
| 97   | PI00087827    | P18124              | RPL7      | Putative uncharacterized protein RPL7 (Fragment)                               | 32                                                                    | 7.436                                                                 | 1.739                             | 4.28   | True                             | False  | Active               | -                     | -                       |
| 994  | PI0017642     | Q96624              | AURKB     | Serine/threonine-protein kinase 12                                             | 39                                                                    | 0.458                                                                 | 0.107                             | 4.28   | False                            | False  | Active               | -                     | -                       |
| 316  | PI0011559     | Q29713              | SMC1A     | Isoform 1 of Structural maintenance of chromosomes protein 4                   | 112                                                                   | 0.497                                                                 | 0.115                             | 4.32   | True                             | False  | Active               | -                     | -                       |
| 398  | PI00043975    | P151311             | ERK       | Erin                                                                           | 69                                                                    | 0.946                                                                 | 0.219                             | 4.32   | True                             | False  | Active               | -                     | -                       |
| 512  | PI00072160    | Q92974              | ARHGFB2   | Rho/Rac guanine nucleotide exchange factor 2                                   | 121                                                                   | 0.408                                                                 | 0.094                             | 4.34   | True                             | False  | Active               | YES                   | -                       |
| 519  | PI00021285    | P14678              | SNRPB     | Isoform SM-B' of Small nuclear ribonucleoprotein-associated proteins B and B'  | 25                                                                    | 1.850                                                                 | 0.430                             | 4.30   | True                             | False  | Active               | -                     | -                       |
| 1148 | PI00021743    | Q17478              | DXH29     | ATP-dependent RNA helicase DXH29                                               | 155                                                                   | 0.073                                                                 | 0.017                             | 4.29   | True                             | False  | Active               | -                     | -                       |
| 1025 | PI00031058    | P50552              | VASP      | Vasodilator-stimulated phosphoprotein                                          | 40                                                                    | 0.495                                                                 | 0.115                             | 4.30   | True                             | False  | Active               | YES                   | -                       |
| 400  | PI00041157    | Q10567              | NOP56     | Nucleolar protein 56                                                           | 96                                                                    | 1.016                                                                 | 0.242                             | 4.20   | False                            | False  | Active               | -                     | -                       |
| 748  | PI0010447     | Q87A02              | SMARCC2   | Isoform 1 of SWI/SNF complex subunit SMARCC2                                   | 133                                                                   | 0.331                                                                 | 0.079                             | 4.19   | True                             | False  | Active               | -                     | -                       |
| 764  | PI00030990    | Q9Y932              | C1orf77   | Isoform 1 of Uncharacterized protein C1orf77                                   | 26                                                                    | 0.983                                                                 | 0.232                             | 4.24   | True                             | False  | Active               | -                     | -                       |
| 454  | PI00022062    | P61004              | HSP51     | 10 kDa heat shock protein, mitochondrial                                       | 11                                                                    | 6.303                                                                 | 1.523                             | 4.14   | True                             | False  | Active               | -                     | -                       |
| 534  | PI00021290    | P14396              | ATP13B2   | ATP-binding cassette, type B, member 2                                         | 134                                                                   | 0.378                                                                 | 0.091                             | 4.20   | True                             | False  | Active               | -                     | -                       |
| 1440 | PI0047748     | Q6P062              | CTR9      | RNA polymerase-associated protein CTR9 homolog                                 | 134                                                                   | 0.034                                                                 | 0.008                             | 4.25   | False                            | False  | Active               | -                     | -                       |
| 1684 | PI00029719    | Q94832              | MYO1D     | Myosin-Id                                                                      | 116                                                                   | 0.047                                                                 | 0.011                             | 4.27   | False                            | False  | Active               | -                     | -                       |
| 1061 | PI0017035     | Q8N164              | SMAD2     | Leucine-rich repeat-containing protein 47                                      | 63                                                                    | 0.068                                                                 | 0.016                             | 4.12   | False                            | False  | Active               | -                     | -                       |
| 1222 | PI00032831    | Q95721              | SMAP29    | Synaptosomal-associated protein 29                                             | 29                                                                    | 3.992                                                                 | 0.995                             | 4.13   | False                            | False  | Active               | -                     | -                       |
| 1173 | PI00031158    | Q9N8V8              | CMAS      | Isoform 1 of N-acetylneuraminyl cytidyltransferase                             | 48                                                                    | 0.302                                                                 | 0.073                             | 4.14   | False                            | False  | Active               | -                     | -                       |
| 35   | PI0000928     | Q9PQ29              | PPP2R1B   | Macrophage-organizing signaling factor 8                                       | 28                                                                    | 1.642                                                                 | 0.396                             | 4.09   | True                             | False  | Active               | -                     | -                       |
| 846  | PI00032849    | Q9Y9C1              | NOP16     | Nucleolar protein 16                                                           | 21                                                                    | 1.070                                                                 | 0.219                             | 4.89   | True                             | False  | Active               | -                     | -                       |
| 597  | PI00009922    | Q62673              | SURP      | SRA stem-loop-interacting RNA-binding protein, mitochondrial                   | 12                                                                    | 3.486                                                                 | 0.711                             | 4.90   | True                             | False  | Active               | -                     | -                       |
| 436  | PI0015605     | Q14588              | BMX9      | Isoform 1 of RNA-binding protein 9                                             | 59                                                                    | 0.122                                                                 | 0.028                             | 4.26   | True                             | False  | Active               | -                     | -                       |
| 1182 | PI000219673   | Q9Y203              | GSTK3     | Glutathione S-transferase kappa 3                                              | 25                                                                    | 0.645                                                                 | 0.131                             | 4.92   | True                             | False  | Active               | -                     | -                       |
| 741  | PI00013927    | P51665              | PSMD7     | 26S proteasome non-ATPase regulatory subunit 7                                 | 37                                                                    | 0.907                                                                 | 0.184                             | 4.93   | True                             | False  | Active               | -                     | -                       |
| 981  | PI0002028     | Q9U709              | TRAF3     | Probable ATP-dependent RNA helicase DDX41                                      | 70                                                                    | 0.427                                                                 | 0.088                             | 4.68   | True                             | False  | Active               | -                     | -                       |
| 769  | PI00054742    | Q9R225              | APIS      | Isoform 2 of Apoptosis inhibitor 5                                             | 57                                                                    | 0.499                                                                 | 0.104                             | 4.80   | True                             | False  | Active               | -                     | -                       |
| 837  | PI00021728    | P20042              | EF252     | Eukaryotic translation initiation factor 2 subunit 2                           | 38                                                                    | 0.669                                                                 | 0.138                             | 4.85   | True                             | False  | Active               | -                     | -                       |
| 512  | PI0005687     | Q15460              | HNRNPUL2  | Heterogeneous nuclear ribonucleoprotein U-like protein 2                       | 85                                                                    | 0.085                                                                 | 0.020                             | 4.73   | False                            | False  | Active               | -                     | -                       |
| 804  | PI000304187   | Q9NWL13             | RMN28     | RNA-binding protein 28                                                         | 86                                                                    | 0.260                                                                 | 0.055                             | 4.73   | False                            | False  | Active               | -                     | -                       |
| 708  | PI00019844    | Q33629              | USP39     | U4/U5 snRNP-associated protein 2                                               | 65                                                                    | 0.517                                                                 | 0.110                             | 4.70   | True                             | False  | Active               | -                     | -                       |
| 1129 | PI00021256    | Q14589              | RPS19     | 19S ribosomal protein S19                                                      | 32                                                                    | 0.360                                                                 | 0.076                             | 4.61   | True                             | False  | Active               | -                     | -                       |
| 348  | PI000412607   | P42766              | RPL35     | 60S ribosomal protein L35                                                      | 15                                                                    | 5.266                                                                 | 1.177                             | 4.47   | True                             | False  | Active               | -                     | -                       |
| 502  | PI00011603    | Q43242              | PSMD3     | 26S proteasome non-ATPase regulatory subunit 3                                 | 61                                                                    | 0.956                                                                 | 0.212                             | 4.51   | True                             | False  | Active               | -                     | -                       |
| 955  | PI0007422     | P16180              | RPL32     | 40S ribosomal protein S24                                                      | 8                                                                     | 2.852                                                                 | 0.656                             | 4.30   | True                             | False  | Active               | -                     | -                       |
| 1210 | PI00009407    | P61803              | DAK1      | Dolichyl-diphosphoglycosyltransferase protein glycosyltransferase subunit DA01 | 12                                                                    | 1.482                                                                 | 0.328                             | 4.52   | True                             | False  | Active               | -                     | -                       |
| 1307 | PI00187011    | Q9J478              | ZC3H4     | Zinc finger CCH domain-containing protein 4                                    | 140                                                                   | 0.089                                                                 | 0.020                             | 4.45   | True                             | False  | Active               | -                     | -                       |
| 960  | PI00021417    | Q42890              | SART1     | U4/U5 snRNP-associated protein 1                                               | 90                                                                    | 0.258                                                                 | 0.056                             | 4.61   | True                             | False  | Active               | -                     | -                       |
| 435  | PI00012143    | Q43395              | HNRNPR    | Isoform 1 of Heterogeneous nuclear ribonucleoprotein R                         | 64                                                                    | 2.387                                                                 | 0.537                             | 4.43   | True                             | False  | Active               | -                     | -                       |
| 883  | PI000748303   | Q96K61              | ZFR       | Putative uncharacterized protein ZFR                                           | 115                                                                   | 0.203                                                                 | 0.044                             | 4.61   | True                             | False  | Active               | -                     | -                       |
| 1778 | PI00101587    | Q9NWL18             | MERT140   | Isoform 1 of BRCA1-A complex subunit MERT140                                   | 37                                                                    | 1.138                                                                 | 0.230                             | 4.60   | False                            | False  | Active               | -                     | -                       |
| 876  | PI00070943    | P43396              | PLA2      | Isoform 1 of Phospholipidase A2 kinase alpha                                   | 231                                                                   | 0.094                                                                 | 0.020                             | 4.70   | True                             | False  | Active               | -                     | -                       |
| 1335 | PI00012970    | Q00743              | PP6C      | Isoform 1 of Serine/threonine phosphatase 6 catalytic subunit                  | 35                                                                    | 1.144                                                                 | 0.232                             | 4.50   | True                             | False  | Active               | -                     | -                       |
| 1439 | PI00043517    | Q15347              | HMG83     | 21 kDa protein                                                                 | 21                                                                    | 0.429                                                                 | 0.094                             | 4.56   | True                             | False  | Active               | -                     | -                       |
| 1262 | PI00169413    | Q42930              | MSPS24    | 28S ribosomal protein S24, mitochondrial                                       | 62                                                                    | 0.178                                                                 | 0.036                             | 4.55   | True                             | False  | Active               | -                     | -                       |
| 543  | PI00033979    | Q92888              | ARHGFE1   | Isoform 2 of Rho guanine nucleotide exchange factor 1                          | 99                                                                    | 0.105                                                                 | 0.020                             | 5.25   | False                            | False  | Active               | -                     | -                       |
| 424  | PI00046294    | Q9Y459              | CDCL5     | Cell division cycle 5-like protein                                             | 92                                                                    | 0.528                                                                 | 0.099                             | 5.33   | True                             | False  | Active               | -                     | -                       |
| 235  | PI00026684    | Q57820              | MRPS41    | Isoform 8 of MRPS complex subunit alpha-1                                      | 109                                                                   | 0.188                                                                 | 0.036                             | 5.31   | True                             | False  | Active               | -                     | -                       |
| 924  | PI00013830    | Q13573              | SNW1      | SNW domain-containing protein 1                                                | 61                                                                    | 0.286                                                                 | 0.054                             | 5.30   | True                             | False  | Active               | -                     | -                       |
| 1638 | PI00039629    | Q17460              | CLASP1    | Isoform 1 of CLIP-associated protein 1                                         | 169                                                                   | 0.041                                                                 | 0.008                             | 5.13   | True                             | False  | Active               | -                     | -                       |
| 549  | PI00041169    | Q17551              | ANXA2     | Isoform 2 of Anexasin A2                                                       | 40                                                                    | 1.231                                                                 | 0.255                             | 4.82   | True                             | False  | Active               | -                     | -                       |
| 1373 | PI00005160    | Q15143              | APPC18    | Actin-related protein 2/3 complex subunit 18                                   | 41                                                                    | 0.256                                                                 | 0.048                             | 5.33   | True                             | False  | Active               | YES*                  | -                       |
| 302  | PI00041361    | P11387              | TOP2      | DNA topoisomerase 1                                                            | 91                                                                    | 0.920                                                                 | 0.175                             | 5.26   | True                             | False  | Active               | -                     | -                       |
| 1281 | PI000791573   | Q15101              | SUGT1     | Isoform 2 of Suppressor of G2 allele of SKP1 homolog                           | 62                                                                    | 0.278                                                                 | 0.052                             | 5.35   | True                             | False  | Active               | -                     | -                       |
| 888  | PI00074471    | Q8T5C8              | PNP1T     | Polynucleotide nucleoside transferase 1, mitochondrial                         | 86                                                                    | 0.239                                                                 | 0.046                             | 5.20   | True                             | False  | Active               | -                     | -                       |
| 931  | PI00051403    | Q48444              | ANCN1     | Coatomer subunit delta                                                         | 57                                                                    | 0.361                                                                 | 0.069                             | 5.23   | False                            | False  | Active               | -                     | -                       |
| 1126 | PI00083547    | Q15113              | H         | RED protein                                                                    | 66                                                                    | 0.208                                                                 | 0.040                             | 5.17   | False                            | False  | Active               | -                     | -                       |
| 1174 | PI00025086    | Q20674              | COX5A     | Cytochrome c oxidase subunit 5A, mitochondrial                                 | 17                                                                    | 1.419                                                                 | 0.270                             | 5.26   | True                             | False  | Active               | -                     | -                       |
| 29   | PI00028994    | Q9Y490              | TAL1      | Tal1                                                                           | 270                                                                   | 2.487                                                                 | 0.487                             | 5.11   | True                             | False  | Active               | YES                   | -                       |
| 545  | PI00029464    | Q15535              | DNB1      | DNA damage-binding protein 1                                                   | 127                                                                   | 0.331                                                                 | 0.064                             | 5.17   | True                             | False  | Active               | -                     | -                       |
| 829  | PI000291200   | Q8WUM0              | NUP133    | Nuclear pore complex protein NUP133                                            | 129                                                                   | 0.206                                                                 |                                   |        |                                  |        |                      |                       |                         |



Supplementary Table 1 (cont.) | Hierarchical clustering analysis of proteins identified in active or inactive integrin adhesion complexes.

| #    | UPI Accession | UniProtKB Accession | Gene name | Protein name                                                                | Relative abundance (mean normalized spectral count) × 10 <sup>3</sup> |                   | Fold enrichment (active/inactive) |                 | Specific enrichment <sup>†</sup> |                      | Adhesome <sup>‡</sup> | Hierarchical clustering |
|------|---------------|---------------------|-----------|-----------------------------------------------------------------------------|-----------------------------------------------------------------------|-------------------|-----------------------------------|-----------------|----------------------------------|----------------------|-----------------------|-------------------------|
|      |               |                     |           |                                                                             | Protein MW (kDa)                                                      | Inactive integrin | Active integrin                   | Active integrin | Inactive integrin                | Cluster <sup>§</sup> |                       |                         |
| 1223 | PI000202425   | Q6P616              | RPRD1A    | isoform 1 of Regulation of nuclear pre-mRNA domain-containing protein 1A    | 86                                                                    | 0.340             | 0.031                             | 10.97           | True                             | False                | Active                |                         |
| 1295 | PI000000719   | Q13420              | EPF2B     | isoform 1 of Translation initiation factor eIF-2B subunit delta             | 58                                                                    | 0.261             | 0.023                             | 11.25           | True                             | False                | Active                |                         |
| 1297 | PI000006298   | Q13427              | PF1G      | isoform 1 of Peptidyl-prolyl cis-trans isomerase G                          | 39                                                                    | 0.015             | 0.017                             | 0.87            | True                             | False                | Active                |                         |
| 509  | PI00021394    | Q6Q832              | DKC1      | H/ACA ribonucleoprotein complex subunit 4                                   | 58                                                                    | 0.923             | 0.096                             | 9.61            | True                             | False                | Active                |                         |
| 595  | PI00015290    | Q9H465              | NCLG      | isoform 1 of Nuclear pore complex NCLG                                      | 128                                                                   | 0.314             | 0.023                             | 6.12            | True                             | False                | Active                |                         |
| 978  | PI000302281   | Q9N9Y3              | DDX56     | Probable ATP-dependent RNA helicase DDX56                                   | 62                                                                    | 3.307             | 0.032                             | 9.59            | True                             | False                | Active                |                         |
| 986  | PI000240812   | Q9NT15              | PDS5B     | 16S kDa protein                                                             | 165                                                                   | 0.078             | 0.008                             | 9.75            | True                             | False                | Active                |                         |
| 247  | PI000200970   | Q91609              | SUPT15H   | FACT complex subunit SPT15                                                  | 120                                                                   | 0.026             | 0.001                             | 10.26           | True                             | False                | Active                |                         |
| 573  | PI00069817    | Q9UG60              | BA21B     | isoform 1 of Tyrosine-protein kinase BA21B                                  | 171                                                                   | 0.248             | 0.024                             | 10.33           | True                             | False                | Active                |                         |
| 1135 | PI000102079   | P23588              | EF4B      | Eukaryotic translation initiation factor 4B                                 | 69                                                                    | 0.193             | 0.019                             | 10.16           | True                             | False                | Active                |                         |
| 856  | PI000296229   | Q9H922              | BIRC1     | Ribosome-protein factor 1 homolog                                           | 36                                                                    | 0.156             | 0.055                             | 10.11           | True                             | False                | Active                |                         |
| 1036 | PI000152929   | P62310              | LSM3      | U6 snRNA-associated Sm-like protein LSM3                                    | 12                                                                    | 1.662             | 0.164                             | 10.13           | True                             | False                | Active                |                         |
| 525  | PI000385042   | Q9B274              | GTPBP4    | Nucleolar GTP-binding protein 1                                             | 74                                                                    | 0.711             | 0.071                             | 10.01           | True                             | False                | Active                |                         |
| 1015 | PI000214351   | P35958              | PSMC2     | 26S proteasome regulatory subunit 7                                         | 49                                                                    | 0.453             | 0.045                             | 10.07           | True                             | False                | Active                |                         |
| 1336 | PI000182180   | Q9NAM0              | OTUD6B    | OTU domain containing 6B                                                    | 37                                                                    | 0.300             | 0.030                             | 10.00           | True                             | False                | Active                |                         |
| 1378 | PI00012837    | P33176              | KIF5B     | Kinesin 1 heavy chain                                                       | 110                                                                   | 0.120             | 0.012                             | 10.00           | True                             | False                | Active                |                         |
| 68   | PI00021652    | P45973              | CKB5      | Chromatin domain homolog 5                                                  | 22                                                                    | 1.748             | 0.165                             | 10.59           | True                             | False                | Active                |                         |
| 788  | PI00016697    | P16157              | ANKK1     | isoform 1 of Ankyrin-1                                                      | 206                                                                   | 0.143             | 0.013                             | 11.00           | True                             | False                | Active                |                         |
| 996  | PI00006252    | Q12904              | AIMP1     | Aminoacyl tRNA synthetase complex-interacting multifunctional protein 1     | 34                                                                    | 0.623             | 0.058                             | 10.74           | True                             | False                | Active                |                         |
| 601  | PI00074595    | Q98848              | EBNA1BP2  | Probable RNA-processing protein EBP2                                        | 35                                                                    | 1.171             | 0.113                             | 10.36           | True                             | False                | Active                |                         |
| 1052 | PI00003527    | Q96019              | AT16A     | isoform 1 of Actin-like protein 6A                                          | 49                                                                    | 0.437             | 0.042                             | 10.40           | True                             | False                | Active                |                         |
| 1066 | PI00000733    | Q9Y511              | UTP18     | U3 small nuclear RNA-associated protein 18 homolog                          | 64                                                                    | 0.267             | 0.026                             | 10.27           | True                             | False                | Active                |                         |
| 1258 | PI00064570    | Q9H923              | SRB2      | 18 kDa protein                                                              | 18                                                                    | 0.964             | 0.092                             | 10.48           | True                             | False                | Active                |                         |
| 1329 | PI000113122   | Q16543              | CCDC37    | Hsp90 co-chaperone Cdc37                                                    | 40                                                                    | 0.314             | 0.030                             | 10.47           | True                             | False                | Active                |                         |
| 329  | PI00016801    | Q90367              | GLUD1     | Glutamate dehydrogenase 1, mitochondrial                                    | 61                                                                    | 1.675             | 0.181                             | 9.25            | True                             | False                | Active                |                         |
| 1185 | PI000158020   | Q90801              | SFRS14    | isoform 1 of Putative splicing factor, arginine/serine-rich 14              | 120                                                                   | 0.101             | 0.011                             | 9.18            | True                             | False                | Active                |                         |
| 96   | PI000044213   | P46013              | MIR67     | isoform Long of Argonaute 1-7                                               | 39                                                                    | 0.025             | 0.008                             | 9.19            | True                             | False                | Active                |                         |
| 695  | PI000328753   | Q86J92              | KTNI      | isoform 1 of Kinectin                                                       | 156                                                                   | 0.214             | 0.023                             | 9.30            | True                             | False                | Active                | YES                     |
| 944  | PI000300131   | P42127              | TMPO      | isoform Beta of Lamina-associated polypeptide 2, isoforms beta/gamma        | 51                                                                    | 1.545             | 0.167                             | 9.25            | True                             | False                | Active                |                         |
| 5401 | PI00020702    | Q92013              | NDP1      | isoform 1 of Isocitrate dehydrogenase (NAD) subunit alpha, mitochondrial    | 49                                                                    | 1.302             | 0.153                             | 9.15            | True                             | False                | Active                |                         |
| 1005 | PI000797126   | Q13765              | NACA      | nascent polypeptide-associated complex alpha subunit isoform A              | 95                                                                    | 0.258             | 0.028                             | 9.21            | True                             | False                | Active                |                         |
| 553  | PI00005648    | Q14151              | SARF2     | Scarfoid attachment factor 2                                                | 107                                                                   | 0.434             | 0.046                             | 9.43            | True                             | False                | Active                |                         |
| 1012 | PI00064328    | Q14742              | PRMT5     | protein arginine methyltransferase 5 isoform b                              | 60                                                                    | 0.590             | 0.066                             | 9.12            | True                             | False                | Active                |                         |
| 1013 | PI00064328    | Q14744              | PRMT5     | protein arginine methyltransferase 5 isoform b                              | 71                                                                    | 0.261             | 0.028                             | 9.32            | True                             | False                | Active                |                         |
| 1037 | PI000218993   | Q92598              | HSPH1     | isoform Beta of Heat shock protein 105 kDa                                  | 92                                                                    | 0.113             | 0.012                             | 9.42            | True                             | False                | Active                |                         |
| 1519 | PI000112010   | P91923              | DNAH3     | 28S ribosomal protein S28, mitochondrial                                    | 46                                                                    | 0.968             | 0.209                             | 9.24            | True                             | False                | Active                |                         |
| 679  | PI000033768   | Q00541              | PE51      | isoform 1 of Pescadillo homolog                                             | 68                                                                    | 0.525             | 0.058                             | 9.05            | True                             | False                | Active                |                         |
| 940  | PI00032553    | Q9BY28              | WOR18     | WD repeat-containing protein 18                                             | 47                                                                    | 0.507             | 0.056                             | 9.05            | True                             | False                | Active                |                         |
| 1063 | PI000334190   | Q9U012              | STOM2     | Stomatolysin protein 2                                                      | 39                                                                    | 0.609             | 0.057                             | 9.05            | True                             | False                | Active                |                         |
| 984  | PI000102752   | Q96137              | RBM15     | isoform 1 of Putative RNA-binding protein 15                                | 107                                                                   | 0.168             | 0.018                             | 9.33            | True                             | False                | Active                |                         |
| 868  | PI000550766   | Q96773              | RBP1      | Ribosomal RNA processing protein 1 homolog A                                | 53                                                                    | 0.504             | 0.056                             | 9.00            | True                             | False                | Active                |                         |
| 1082 | PI000374481   | Q12796              | CEHW      | isoform 3 of Centromere protein 1                                           | 65                                                                    | 0.590             | 0.056                             | 9.04            | True                             | False                | Active                |                         |
| 758  | PI000000643   | Q95816              | BAG2      | BAG family molecular chaperone regulator 2                                  | 24                                                                    | 1.269             | 0.151                             | 8.40            | True                             | False                | Active                |                         |
| 1001 | PI000430472   | Q9N300              | ASC3      | Activating signal co-receptor 1 complex subunit 3                           | 251                                                                   | 0.066             | 0.008                             | 8.25            | True                             | False                | Active                |                         |
| 144  | PI000072280   | Q12880              | TOP2B     | isoform Beta-2 of DNA topoisomerase 2-beta                                  | 183                                                                   | 0.866             | 0.116                             | 8.33            | True                             | False                | Active                |                         |
| 587  | PI000166969   | Q86U07              | FERM3T    | isoform 2 of Fermin family homolog 3                                        | 85                                                                    | 0.790             | 0.088                             | 8.30            | True                             | False                | Active                | YES                     |
| 1344 | PI00030911    | Q9BVA0              | VAMP8     | Vesicle-associated membrane protein 8                                       | 11                                                                    | 1.492             | 0.179                             | 8.34            | True                             | False                | Active                |                         |
| 1051 | PI000106495   | Q98943              | NCAPG     | Condensin complex subunit 3                                                 | 114                                                                   | 0.161             | 0.019                             | 8.47            | True                             | False                | Active                |                         |
| 1402 | PI000021716   | Q92691              | MFRP2     | 28S ribosomal protein S28, mitochondrial                                    | 49                                                                    | 0.958             | 0.118                             | 8.22            | True                             | False                | Active                |                         |
| 858  | PI000071715   | Q9Y221              | NIP7      | isoform 1 of 60S ribosome subunit biogenesis protein NIP7 homolog           | 20                                                                    | 1.124             | 0.131                             | 8.58            | True                             | False                | Active                |                         |
| 897  | PI000469490   | Q4D011              | RPL7L1    | 60S ribosomal protein L7-like 1                                             | 29                                                                    | 0.777             | 0.091                             | 8.54            | True                             | False                | Active                |                         |
| 966  | PI000168388   | Q9H464              | PRMT5     | isoform 1 of Signal recognition particle 68 kDa protein                     | 64                                                                    | 0.077             | 0.004                             | 8.88            | True                             | False                | Active                |                         |
| 993  | PI00015282    | P78395              | PRAME     | Melanoma antigen preferentially expressed in tumours                        | 58                                                                    | 0.294             | 0.034                             | 8.65            | True                             | False                | Active                |                         |
| 1183 | PI000050638   | P14441              | UBL4A     | Ubiquitin-like protein 4A                                                   | 18                                                                    | 0.800             | 0.092                             | 8.70            | True                             | False                | Active                |                         |
| 1017 | PI000334499   | Q9U011              | NUP2      | isoform 1 of Nuclear autoantigenic sperm protein                            | 86                                                                    | 0.203             | 0.021                             | 8.70            | True                             | False                | Active                |                         |
| 1265 | PI00008477    | Q9ULW0              | TPX2      | Targeting protein for Xkp2                                                  | 86                                                                    | 0.133             | 0.015                             | 8.87            | True                             | False                | Active                |                         |
| 457  | PI000376317   | Q9P219              | EDC4      | isoform 1 of Enhancer of mRNA decapping protein 4                           | 152                                                                   | 0.366             | 0.052                             | 7.04            | True                             | False                | Active                |                         |
| 560  | PI000212223   | Q22341              | PAK2      | Multifunctional protein PAK2                                                | 50                                                                    | 0.388             | 0.076                             | 7.07            | True                             | False                | Active                |                         |
| 527  | PI00016910    | Q9V613              | EF3C      | Eukaryotic translation initiation factor 3 subunit C                        | 105                                                                   | 0.555             | 0.081                             | 6.85            | True                             | False                | Active                |                         |
| 393  | PI00008529    | P05387              | RPLP2     | 60S acidic ribosomal protein P2                                             | 12                                                                    | 6.710             | 0.996                             | 6.74            | True                             | False                | Active                |                         |
| 540  | PI00022079    | Q9H923              | GMP7      | GMP anchorage [glutamine-hydroxylysyl]                                      | 72                                                                    | 0.670             | 0.076                             | 8.76            | True                             | False                | Active                |                         |
| 224  | PI000304612   | P40429              | RPL13A    | 60S ribosomal protein L13a                                                  | 24                                                                    | 4.072             | 0.553                             | 7.36            | True                             | False                | Active                |                         |
| 574  | PI000291175   | P18206              | VCL       | isoform 1 of Vinculin                                                       | 117                                                                   | 0.456             | 0.062                             | 7.35            | True                             | False                | Active                | YES                     |
| 1000 | PI000179001   | Q92061              | HMG1A     | isoform HMG1 of High mobility group protein HMG-1/HMGY-1                    | 42                                                                    | 1.698             | 0.288                             | 6.88            | True                             | False                | Active                |                         |
| 1214 | PI00006865    | Q75396              | SEC22B    | Vesicle-trafficking protein SEC22B                                          | 25                                                                    | 0.657             | 0.088                             | 7.47            | True                             | False                | Active                |                         |
| 1286 | PI000203078   | Q91750              | C1orf68   | Skin-specific protein 32                                                    | 26                                                                    | 0.562             | 0.076                             | 7.39            | True                             | False                | Active                |                         |
| 311  | PI000321156   | Q9H923              | ATP2B1    | isoform 1 of ATP2B complex subunit beta                                     | 65                                                                    | 0.955             | 0.113                             | 7.23            | True                             | False                | Active                |                         |
| 456  | PI000301323   | Q9N9V1              | DX18      | ATP-dependent RNA helicase DDX18                                            | 75                                                                    | 0.782             | 0.108                             | 7.24            | True                             | False                | Active                |                         |
| 632  | PI000294891   | P46087              | NOP2      | Putative uncharacterized protein NOP2                                       | 94                                                                    | 0.473             | 0.065                             | 7.28            | True                             | False                | Active                |                         |
| 736  | PI000287515   | Q86U04              | MTDH      | Protein LINC                                                                | 68                                                                    | 0.584             | 0.067                             | 8.21            | True                             | False                | Active                |                         |
| 1140 | PI000789041   | Q9H307              | PNN       | isoform 1 of Pinn                                                           | 82                                                                    | 0.146             | 0.020                             | 7.30            | True                             | False                | Active                |                         |
| 1441 | PI000412771   | Q9Y566              | CD2AP     | CD2-associated protein                                                      | 71                                                                    | 0.134             | 0.018                             | 7.44            | True                             | False                | Active                |                         |
| 1118 | PI000702094   | Q9B9Y5              | AHCY1     | transcription factor 415                                                    | 253                                                                   | 0.031             | 0.004                             | 7.75            | True                             | False                | Active                |                         |
| 1069 | PI000184002   | Q15813              | TUBE1     | Tubulin-specific chaperone E                                                | 59                                                                    | 0.923             | 0.044                             | 7.34            | True                             | False                | Active                |                         |
| 1238 | PI000295889   | Q9J132              | SMP19     | Signal recognition particle 19 kDa protein                                  | 16                                                                    | 0.900             | 0.123                             | 7.32            | True                             | False                | Active                |                         |
| 298  | PI000256861   | Q9J9P3              | MACF1     | isoform 2 of Microtubule-actin cross-linking factor 1, isoforms 1/2/3/5     | 620                                                                   | 0.139             | 0.020                             | 7.95            | True                             | False                | Active                | YES                     |
| 508  | PI000071422   | Q92691              | ANP2      | isoform 1 of Actin- nucleator-rich nuclear phosphoprotein 2 family member B | 29                                                                    | 1.465             | 0.186                             | 7.98            | True                             | False                | Active                |                         |
| 754  | PI000129113   | Q9Y221              | USP4      | Ubiquitin carboxyl-terminal hydrolase 14                                    | 56                                                                    | 0.562             | 0.070                             | 8.03            | True                             | False                | Active                |                         |
| 897  | PI000006213   | Q15154              | PCM1      | isoform 1 of Pericentriolar material 1 protein                              | 228                                                                   | 0.131             | 0.016                             | 8.19            | True                             | False                | Active                |                         |
| 1312 | PI000793443   | Q90440              | IPSC      | isoform 1 of Importin 5                                                     | 124                                                                   | 0.125             | 0.016                             | 7.81            | True                             | False                | Active                |                         |
| 477  | PI000064379   | Q9Y243              | NOP58     | Nucleolar protein 58                                                        | 60                                                                    | 1.109             | 0.138                             | 8.04            | True                             | False                | Active                |                         |
| 503  | PI000328887   | Q13895              | BYSL      | Bystin                                                                      | 50                                                                    | 1.224             | 0.151                             | 8.11            | True                             | False                | Active                |                         |
| 2260 | PI000312499   | Q9Y401              | TIAP2     | Tiap2                                                                       | 272                                                                   | 0.134             | 0.014                             | 8.15            | True                             | False                | Active                | YES*                    |
| 1000 | PI000213000   | Q14232              | EIF2B1    | Translation initiation factor eIF-2B subunit alpha                          | 34                                                                    | 0.591             | 0.077                             | 7.68            | True                             | False                | Active                |                         |
| 1403 | PI000132356   | P33240              | CFP2      | isoform 1 of Cleavage stimulation factor subunit 2                          | 61                                                                    | 0.163             | 0.022                             | 7.41            | True                             | False                | Active                |                         |
| 749  | PI000044559   | Q9H923              | DMT1L     | Probable dimethylthioesterase transferase                                   | 65                                                                    | 0.313             | 0.031                             | 7.71            | True                             | False                | Active                |                         |
| 1278 | PI00021248    | P53350              | PLK1      | Serine/threonine-protein kinase PLK1                                        | 68                                                                    | 0.149             | 0.019                             | 7.84            | True                             | False                | Active                |                         |
| 1364 | PI000411614   | Q79717              | WH0L1     | WD repeat and HMG-box DNA-binding protein 1                                 | 126                                                                   | 0.069             | 0.009                             | 7.67            | True                             | False                | Active                |                         |
| 1576 | PI000207717   | Q16729              | GEM1A     | Component of gems                                                           | 120                                                                   | 0.17              |                                   |                 |                                  |                      |                       |                         |

Supplementary Table 1 (cont.) | Hierarchical clustering analysis of proteins identified in active or inactive integrin adhesion complexes.

| #    | IPI Accession | UniProtKB Accession | Gene name | Protein name                                                                          | Protein MW (kDa) | Relative abundance (mean normalized spectral count) × 10 <sup>3</sup> |                   | Fold enrichment (active/inactive) |                   | Specific enrichment (active/inactive) |                   | Cluster* | Adhesome* | Hierarchical clustering |
|------|---------------|---------------------|-----------|---------------------------------------------------------------------------------------|------------------|-----------------------------------------------------------------------|-------------------|-----------------------------------|-------------------|---------------------------------------|-------------------|----------|-----------|-------------------------|
|      |               |                     |           |                                                                                       |                  | Active integrin                                                       | Inactive integrin | Active integrin                   | Inactive integrin | Active integrin                       | Inactive integrin |          |           |                         |
| 1617 | IP00200685    | P50613              | CDK7      | Cell division protein kinase 7                                                        | 39               | 0.129                                                                 | 0                 | NO (active)                       | True              | False                                 | Active            | -        |           |                         |
| 2193 | IP00161477    | Q8V973              | ELP3      | Isomorph 1 of Elocator complex protein 3                                              | 62               | 0.129                                                                 | 62                | NO (active)                       | True              | False                                 | Active            | -        |           |                         |
| 1490 | IP00032881    | Q9Y309              | MRRP23    | 28S ribosomal protein S23, mitochondrial                                              | 22               | 0.570                                                                 | 0                 | NO (active)                       | True              | False                                 | Active            | -        |           |                         |
| 1231 | IP00002134    | Q146401             | PSMD5     | 26S proteasome non-ATPase regulatory subunit 5                                        | 56               | 0.234                                                                 | 0                 | NO (active)                       | True              | False                                 | Active            | -        |           |                         |
| 1643 | IP0003870     | Q8V977              | CAT5A4    | Cancer/testis antigen family 45 member A45A6                                          | 21               | 0.384                                                                 | 0                 | NO (active)                       | True              | False                                 | Active            | -        |           |                         |
| 1157 | IP0002880     | Q14146              | URB2      | Unlikely ribosome biogenesis protein 2 homolog                                        | 171              | 0.095                                                                 | 0                 | NO (active)                       | True              | False                                 | Active            | -        |           |                         |
| 1356 | IP00062336    | Q86P16              | RPRD1A    | Isomorph 2 of Regulator of nuclear pre-mRNA domain-containing protein 1A              | 33               | 0.371                                                                 | 0                 | NO (active)                       | True              | False                                 | Active            | -        |           |                         |
| 1579 | IP00015962    | Q10814              | Cat6p4    | Cat6p4                                                                                | 21               | 0.345                                                                 | 0                 | NO (active)                       | True              | False                                 | Active            | -        |           |                         |
| 1215 | IP00007004    | Q9Y389              | RBP15     | RRP15-like protein                                                                    | 31               | 0.397                                                                 | 0                 | NO (active)                       | True              | False                                 | Active            | -        |           |                         |
| 1123 | IP00470883    | Q6MZP3              | STAG2     | stromal antigen 2 isomorph                                                            | 146              | 0.111                                                                 | 0                 | NO (active)                       | True              | False                                 | Active            | -        |           |                         |
| 2151 | IP00295400    | P28081              | WRNS      | Isomorph 1 of Tyrosylphosphoryl-ATPase synthase, cytoplasmic                          | 53               | 0.057                                                                 | 0                 | NO (active)                       | False             | False                                 | Active            | -        |           |                         |
| 1665 | IP00025264    | Q86874              | CYCL1     | Cytochrome c1, heme protein, mitochondrial                                            | 35               | 0.144                                                                 | 0                 | NO (active)                       | True              | False                                 | Active            | -        |           |                         |
| 2188 | IP00067943    | Q86876              | TSEN4A    | RNA splicing endonuclease 3A homolog                                                  | 27               | 0.080                                                                 | 0                 | NO (active)                       | False             | False                                 | Active            | -        |           |                         |
| 2154 | IP00794240    | Q8V915              | MRRP39    | Putative uncharacterized protein MRRP39                                               | 38               | 0.074                                                                 | 0                 | NO (active)                       | False             | False                                 | Active            | -        |           |                         |
| 1581 | IP00012149    | Q00566              | MPHCPH10  | US small nuclear ribonucleoprotein protein MPP10                                      | 79               | 0.096                                                                 | 0                 | NO (active)                       | True              | False                                 | Active            | -        |           |                         |
| 1925 | IP00299977    | Q9N9X4              | PHF11     | 14 kDa phosphohistone phosphatase                                                     | 14               | 0.334                                                                 | 0                 | NO (active)                       | True              | False                                 | Active            | -        |           |                         |
| 1760 | IP00062437    | Q86F42              | DHML2     | Dynein light chain 2, cytoplasmic                                                     | 100              | 3.593                                                                 | 0                 | NO (active)                       | True              | False                                 | Active            | -        |           |                         |
| 2041 | IP00103087    | R9WJ05              | EMN6G     | Gen-associated protein 6                                                              | 19               | 0.114                                                                 | 0                 | NO (active)                       | True              | False                                 | Active            | -        |           |                         |
| 1860 | IP0006442     | Q13842              | COL1      | Collin                                                                                | 63               | 0.114                                                                 | 0                 | NO (active)                       | True              | False                                 | Active            | -        |           |                         |
| 1484 | IP00107745    | Q52242              | LUC7L3    | Isomorph 1 of Luc7-like protein 3                                                     | 51               | 0.198                                                                 | 0                 | NO (active)                       | True              | False                                 | Active            | -        |           |                         |
| 1555 | IP00002564    | P18987              | TYCC1     | DNA repair protein TYCC1 protein                                                      | 67               | 0.072                                                                 | 0                 | NO (active)                       | True              | False                                 | Active            | -        |           |                         |
| 1996 | IP00055086    | Q9NMV9              | Cl2orf111 | Cell cycle regulator Mat88Bb homolog                                                  | 80               | 0.037                                                                 | 0                 | NO (active)                       | False             | False                                 | Active            | -        |           |                         |
| 1247 | IP00465128    | P48379              | BAT3      | Isomorph 1 of Large proline-rich protein BAT3                                         | 119              | 0.114                                                                 | 0                 | NO (active)                       | True              | False                                 | Active            | -        |           |                         |
| 1386 | IP00454540    | Q9N971              | PAL1P1    | 21-activated protein kinase-interacting protein 1                                     | 44               | 0.172                                                                 | 0                 | NO (active)                       | True              | False                                 | Active            | -        |           |                         |
| 956  | IP00290460    | Q75821              | EF3G      | Eukaryotic translation initiation factor 3 subunit G                                  | 36               | 0.574                                                                 | 0                 | NO (active)                       | True              | False                                 | Active            | -        |           |                         |
| 1178 | IP00239815    | Q86966              | CHR12A    | Isomorph 1 of Chrin                                                                   | 77               | 0.145                                                                 | 0                 | NO (active)                       | True              | False                                 | Active            | -        |           |                         |
| 1285 | IP00395568    | Q8V900              | PHF6      | Isomorph 1 of PHF finger protein 6                                                    | 42               | 0.214                                                                 | 0                 | NO (active)                       | True              | False                                 | Active            | -        |           |                         |
| 1681 | IP00164949    | Q8V907              | THL1      | Isomorph NLF-C Negative elongation factor C/D                                         | 66               | 0.087                                                                 | 0                 | NO (active)                       | True              | False                                 | Active            | -        |           |                         |
| 905  | IP00393747    | Q15061              | WR43      | WD repeat-containing protein 43                                                       | 75               | 0.283                                                                 | 0                 | NO (active)                       | True              | False                                 | Active            | -        |           |                         |
| 1218 | IP00174673    | Q86812              | FN1       | Fibronectin type 1 isomorph 4 prepropeptide isomorph 10                               | 253              | 0.037                                                                 | 0                 | NO (active)                       | True              | False                                 | Active            | -        |           |                         |
| 2148 | IP00478834    | Q9N9W6              | ARGU1     | Isomorph 1 of Arginine and glutamate-rich protein 1                                   | 33               | 0.087                                                                 | 0                 | NO (active)                       | True              | False                                 | Active            | -        |           |                         |
| 1787 | IP00305383    | Q12695              | UOCCR2    | Cytochrome b-c1 complex subunit 2, mitochondrial                                      | 48               | 0.136                                                                 | 0                 | NO (active)                       | True              | False                                 | Active            | -        |           |                         |
| 1862 | IP00216682    | Q17065              | STOM      | Erythrocyte band 7 integral membrane protein                                          | 122              | 0.189                                                                 | 0                 | NO (active)                       | True              | False                                 | Active            | -        |           |                         |
| 1876 | IP00293867    | P30046              | DDT       | D-dopamine decarboxylase                                                              | 13               | 0.244                                                                 | 0                 | NO (active)                       | True              | False                                 | Active            | -        |           |                         |
| 1781 | IP00006211    | Q92502              | VAPB      | Isomorph 1 of Vesicle-associated membrane protein-associated protein B/C              | 27               | 0.429                                                                 | 0                 | NO (active)                       | True              | False                                 | Active            | -        |           |                         |
| 1642 | IP00216597    | Q8V919              | CTSL5     | Cancer/testis antigen family 45 member A5                                             | 20               | 0.507                                                                 | 0                 | NO (active)                       | True              | False                                 | Active            | -        |           |                         |
| 2169 | IP0018895     | PE2487              | RPLR2G    | DNA-directed RNA polymerase II subunit RPB2                                           | 19               | 0.076                                                                 | 0                 | NO (active)                       | False             | False                                 | Active            | -        |           |                         |
| 2196 | IP00106928    | Q86A45              | PTPN2     | Protein tyrosine phosphatase, non-receptor type 2                                     | 41               | 0.053                                                                 | 0                 | NO (active)                       | False             | False                                 | Active            | -        | YES       |                         |
| 1640 | IP00471764    | Q8V904              | TRAF3     | Isomorph alpha 3 subunit                                                              | 116              | 0.097                                                                 | 0                 | NO (active)                       | False             | False                                 | Active            | -        |           |                         |
| 2000 | IP00089902    | Q02218              | OGDH      | 2-oxoglutarate dehydrogenase, mitochondrial                                           | 116              | 0.030                                                                 | 0                 | NO (active)                       | False             | False                                 | Active            | -        |           |                         |
| 1245 | IP00004795    | P54105              | CLN15A    | Methylsulfonium subunit p1Cin                                                         | 26               | 0.612                                                                 | 0                 | NO (active)                       | True              | False                                 | Active            | -        |           |                         |
| 1248 | IP00000702    | Q8V900              | PHF6      | Protein, glutamic acid-, leucine-rich protein 1 (PCLP1)                               | 42               | 0.123                                                                 | 0                 | NO (active)                       | True              | False                                 | Active            | -        |           |                         |
| 1666 | IP00032649    | A3N883              | SBN01     | Isomorph 1 of Protein strawberry notch homolog 1                                      | 154              | 0.016                                                                 | 0                 | NO (active)                       | False             | False                                 | Active            | -        |           |                         |
| 963  | IP00179680    | Q14617              | AP3D1     | Isomorph 1 of AP-3 complex subunit delta-1                                            | 137              | 0.149                                                                 | 0                 | NO (active)                       | True              | False                                 | Active            | -        |           |                         |
| 1286 | IP00041537    | Q8V908              | FIBP3     | Peptidyl-prolyl-cis-trans isomerase FIBP3                                             | 28               | 0.507                                                                 | 0                 | NO (active)                       | True              | False                                 | Active            | -        |           |                         |
| 2078 | IP00470743    | Q8V904              | TRAF3     | Isomorph 1 of AT-rich interactive domain-containing protein 2                         | 197              | 0.013                                                                 | 0                 | NO (active)                       | True              | False                                 | Active            | -        |           |                         |
| 1633 | IP00873809    | Q9Y3X1              | SNX9      | Sorting nexin-9                                                                       | 46               | 0.146                                                                 | 0                 | NO (active)                       | True              | False                                 | Active            | -        |           |                         |
| 830  | IP00102069    | Q12407              | EF3M      | Eukaryotic translation initiation factor 3 subunit M                                  | 43               | 0.738                                                                 | 0                 | NO (active)                       | True              | False                                 | Active            | -        |           |                         |
| 1099 | IP00454664    | Q9N911              | TEC10     | Tec10-expressed sequence 10 protein                                                   | 121              | 0.010                                                                 | 0                 | NO (active)                       | True              | False                                 | Active            | -        |           |                         |
| 887  | IP00454369    | Q15070              | DST       | dystonin isomorph 2                                                                   | 650              | 0.004                                                                 | 0                 | NO (active)                       | False             | False                                 | Active            | -        |           |                         |
| 2227 | IP00001364    | Q9Y386              | GCFC1     | Isomorph 1 of GC-rich sequence DNA-binding factor homolog                             | 105              | 0.021                                                                 | 0                 | NO (active)                       | False             | False                                 | Active            | -        |           |                         |
| 2028 | IP00295236    | Q15002              | POLR2B    | Polymorph protein SUI2                                                                | 83               | 0.043                                                                 | 0                 | NO (active)                       | True              | False                                 | Active            | -        |           |                         |
| 1820 | IP00008247    | Q8V904              | ANAPCS    | Isomorph 1 of Anaphase-promoting complex subunit 5                                    | 85               | 0.064                                                                 | 0                 | NO (active)                       | True              | False                                 | Active            | -        |           |                         |
| 1840 | IP00065109    | P12532              | CKMT1A    | Isomorph 1 of Creatine kinase U-type, mitochondrial                                   | 47               | 0.204                                                                 | 0                 | NO (active)                       | True              | False                                 | Active            | -        |           |                         |
| 1740 | IP00170766    | Q8V904              | RBM17     | Splicing factor 45                                                                    | 43               | 0.136                                                                 | 0                 | NO (active)                       | True              | False                                 | Active            | -        |           |                         |
| 1545 | IP00040353    | P52657              | GT72A2    | Transcription initiation factor IIA subunit 2                                         | 12               | 0.540                                                                 | 0                 | NO (active)                       | True              | False                                 | Active            | -        |           |                         |
| 1299 | IP00790299    | Q9N9W9              | SLTM      | 68 kDa protein                                                                        | 68               | 0.117                                                                 | 0                 | NO (active)                       | True              | False                                 | Active            | -        |           |                         |
| 2209 | IP00061037    | Q8V902              | CHC101    | Coiled-coil neck-coiled-coil helix domain-containing protein 1                        | 16               | 0.194                                                                 | 0                 | NO (active)                       | False             | False                                 | Active            | -        |           |                         |
| 2222 | IP00063903    | Q8V905              | USMG65    | Up-regulated during skeletal muscle growth protein 5                                  | 6                | 0.336                                                                 | 0                 | NO (active)                       | False             | False                                 | Active            | -        |           |                         |
| 1836 | IP00216412    | Q8V973              | QSOX1     | Isomorph 2 of Coiled-coil domain-containing protein QSOX1                             | 83               | 0.022                                                                 | 0                 | NO (active)                       | False             | False                                 | Active            | -        |           |                         |
| 1790 | IP00022125    | Q8V900              | ANP       | Actin-dependent neuroprotection homeobox protein                                      | 124              | 0.053                                                                 | 0                 | NO (active)                       | True              | False                                 | Active            | -        |           |                         |
| 1475 | IP00011857    | Q13112              | CHAF1B    | Chromatin assembly factor 1 subunit B                                                 | 61               | 0.169                                                                 | 0                 | NO (active)                       | True              | False                                 | Active            | -        |           |                         |
| 2122 | IP00020984    | P17824              | CANX      | Calnexin                                                                              | 27               | 0.056                                                                 | 0                 | NO (active)                       | True              | False                                 | Active            | -        |           |                         |
| 1523 | IP00025796    | Q15043              | NOL5B     | NOL5B dehydrogenase [ubiquinone] iron-sulfur protein 3, mitochondrial                 | 50               | 0.346                                                                 | 0                 | NO (active)                       | True              | False                                 | Active            | -        |           |                         |
| 2040 | IP00435554    | A43665              | RG310     | Isomorph 3 of Regulator of G-protein signaling 10                                     | 21               | 0.069                                                                 | 0                 | NO (active)                       | False             | False                                 | Active            | -        |           |                         |
| 1091 | IP00003886    | Q8V972              | GNL3      | Isomorph 2 of Guanine nucleotide-binding protein-like 3                               | 61               | 0.324                                                                 | 0                 | NO (active)                       | True              | False                                 | Active            | -        |           |                         |
| 1195 | IP00221114    | Q8V904              | TRIM33    | Isomorph 1 of E3 ubiquitin-protein ligase TRIM33                                      | 63               | 0.101                                                                 | 0                 | NO (active)                       | True              | False                                 | Active            | -        |           |                         |
| 1422 | IP00018500    | Q9P856              | ARID3A    | AT-rich interactive domain-containing protein 3A                                      | 63               | 0.198                                                                 | 0                 | NO (active)                       | True              | False                                 | Active            | -        |           |                         |
| 1033 | IP00026320    | Q95071              | UBR5      | E3 ubiquitin-protein ligase UBR5                                                      | 309              | 0.042                                                                 | 0                 | NO (active)                       | True              | False                                 | Active            | -        |           |                         |
| 1132 | IP00145590    | Q8V904              | MIR59P    | MIR59A domain-interacting nuclear phosphoprotein                                      | 34               | 0.075                                                                 | 0                 | NO (active)                       | True              | False                                 | Active            | -        |           |                         |
| 1234 | IP00149473    | P20290              | BT3       | Isomorph 2 of Transcription factor BT3                                                | 18               | 0.736                                                                 | 0                 | NO (active)                       | True              | False                                 | Active            | -        |           |                         |
| 1363 | IP00069070    | Q9Y399              | MRRP2     | Mitochondrial 28S ribosomal protein S2                                                | 36               | 0.320                                                                 | 0                 | NO (active)                       | True              | False                                 | Active            | -        |           |                         |
| 936  | IP00015660    | Q8V986              | VOK1      | Serine/threonine-protein kinase VOK1                                                  | 45               | 0.475                                                                 | 0                 | NO (active)                       | True              | False                                 | Active            | -        |           |                         |
| 991  | IP00300659    | Q8V919              | PAR1B     | Parafibromin                                                                          | 61               | 0.387                                                                 | 0                 | NO (active)                       | True              | False                                 | Active            | -        |           |                         |
| 1885 | IP00177437    | Q8V920              | CRNK1     | Isomorph 1 of Crooked-neck-like protein 1                                             | 100              | 0.022                                                                 | 0                 | NO (active)                       | False             | False                                 | Active            | -        |           |                         |
| 1825 | IP00327791    | Q95707              | PD94      | Ribonuclease P protein subunit p29                                                    | 25               | 0.245                                                                 | 0                 | NO (active)                       | True              | False                                 | Active            | -        |           |                         |
| 815  | IP00784561    | Q17425              | SLTFH     | Isomorph 1 of Transcription elongation factor SP76                                    | 199              | 0.119                                                                 | 0                 | NO (active)                       | True              | False                                 | Active            | -        |           |                         |
| 872  | IP00156374    | Q8V920              | IPO4      | Isomorph 1 of Importin-4                                                              | 119              | 0.238                                                                 | 0                 | NO (active)                       | True              | False                                 | Active            | -        |           |                         |
| 1068 | IP00028005    | P57740              | NUP107    | Nuclear pore complex protein Nup107                                                   | 106              | 0.187                                                                 | 0                 | NO (active)                       | True              | False                                 | Active            | -        |           |                         |
| 1146 | IP00331428    | Q8V900              | MAL2      | Protein MAL2 homolog                                                                  | 93               | 0.482                                                                 | 0                 | NO (active)                       | True              | False                                 | Active            | -        |           |                         |
| 1878 | IP00434390    | Q8V924              | ASCC1     | Activating signal co-receptor 1 complex subunit 1 (ASCC1)                             | 44               | 0.139                                                                 | 0                 | NO (active)                       | True              | False                                 | Active            | -        |           |                         |
| 1857 | IP00218493    | P04992              | HRP11     | Hydroxaphane-guanine phosphoribosyltransferase                                        | 25               | 0.173                                                                 | 0                 | NO (active)                       | True              | False                                 | Active            | -        |           |                         |
| 1271 | IP00426911    | Q8V905              | ET1       | Eukaryotic peptide chain release factor subunit 3                                     | 49               | 0.075                                                                 | 0                 | NO (active)                       | True              | False                                 | Active            | -        |           |                         |
| 2239 | IP00300060    | Q9N982              | WDR70     | WD repeat-containing protein 70                                                       | 73               | 0.020                                                                 | 0                 | NO (active)                       | False             | False                                 | Active            | -        |           |                         |
| 2247 | IP00003310    | P12435              | RPL11     | RPL11 protein                                                                         | 14               | 0.103                                                                 | 0                 | NO (active)                       | False             | False                                 | Active            | -        |           |                         |
| 1987 | IP00000000    | Q8V922              | UTP3      | Something about silencing protein 10                                                  | 55               | 0.065                                                                 | 0                 | NO (active)                       | True              | False                                 | Active            | -        |           |                         |
| 1488 | IP00306708    | Q8V905              | PK8       | T-lymphocyte-activated killer cell-originated protein kinase                          | 37               | 0.212                                                                 | 0                 | NO (active)                       | True              | False                                 | Active            | -        |           |                         |
| 2197 | IP00419626    | Q12777              | MRLP55    | Isomorph 1 of 35S ribosomal protein L55, mitochondrial                                | 19               | 0.163                                                                 | 0                 | NO (active)                       | True              | False                                 | Active            | -        |           |                         |
| 2228 | IP00011384    | Q8V949              | ENH1      | Enrichment-containing protein 1                                                       | 61               | 0.033                                                                 | 0                 | NO (active)                       | True              | False                                 | Active            | -        |           |                         |
| 1903 | IP00009598    | Q92905              | CPMS2     | SWP395-associated complex subunit 5                                                   | 38               | 0.186                                                                 | 0                 | NO (active)                       | True              | False                                 | Active            | -        |           |                         |
| 1233 | IP00242273    | Q92925              | SOMNO2    | SOM/SNF-related matrix-associated actin-dependent regulator of chromatin 2 isomorph 2 | 57               | 0.241                                                                 | 0                 | NO (active)                       | True              | False                                 | Active            | -        |           |                         |
| 1165 | IP00201434    | Q8V916              | TRAF3     | Isomorph beta-like protein 2                                                          | 121              | 0.796                                                                 | 0                 | NO (active)                       | True              | False                                 | Active            | -        |           |                         |
| 2210 | IP00217143    | Q8V948              | SDHA      | SDHA protein                                                                          | 57               | 0.053                                                                 | 0                 | NO (active)                       | False             | False                                 | Active            | -        |           |                         |
| 1639 | IP00027448    | Q17964              | ATP5L     | ATP synthase subunit g, mitochondrial                                                 | 11               | 0.890                                                                 | 0                 | NO (active)                       | True              | False                                 | Active            | -        |           |                         |
| 1666 | IP00002938    | Q8V943              | AR17      | Activator of basal transcription 17                                                   | 63               | 0.222                                                                 | 0                 | NO (active)                       | True              | False                                 | Active            | -        |           |                         |
| 1580 | IP00156032    | Q13601              | KRR1      | KRR1 small subunit processome component homolog                                       | 44               | 0.139                                                                 | 0                 | NO (active)                       | True              | False                                 | Active            | -        |           |                         |
| 1838 | IP00015351    | Q86294              | C1orf128  | Isomorph 1 of UPR0424 protein C1orf128                                                | 24               | 0.225                                                                 | 0                 | NO (active)                       | True              | False                                 | Active            | -        |           |                         |
| 1389 | IP00024423    | Q9Y394              | DDX3L     | Probable ATP-dependent RNA helicase DDX3                                              | 46               | 0.075                                                                 | 0                 | NO (active)                       | True              | False                                 | Active            | -        |           |                         |
| 1431 | IP00493194    | Q95983              | MDB3      | Isomorph 1 of Methyl-CpG-binding domain protein 3                                     | 33               | 0.284                                                                 | 0                 | NO (active)                       | True              | False                                 | Active            | -        |           |                         |
| 1383 | IP00303105    | P63                 |           |                                                                                       |                  |                                                                       |                   |                                   |                   |                                       |                   |          |           |                         |

Supplementary Table 1 (cont.) | Hierarchical clustering analysis of proteins identified in active or inactive integrin adhesion complexes.

| #    | PII Accession | UniProtKB Accession | Gene name                            | Protein name                                                         | Relative abundance (mean normalized spectral count) × 10 <sup>3</sup> |                 |                   | Fold enrichment (active/inactive) |                   | Specific enrichment |        | Adhesome* | Hierarchical clustering |
|------|---------------|---------------------|--------------------------------------|----------------------------------------------------------------------|-----------------------------------------------------------------------|-----------------|-------------------|-----------------------------------|-------------------|---------------------|--------|-----------|-------------------------|
|      |               |                     |                                      |                                                                      | MW (kDa)                                                              | Active integrin | Inactive integrin | Active integrin                   | Inactive integrin | Cluster†            |        |           |                         |
| 2203 | PI0002203     | Q9P287              | BCIP                                 | Isomorphous of BRCA2 and CDKN1A-interacting protein                  | 36                                                                    | 0.080           | 0                 | NO (active)                       | True              | False               | Active | -         |                         |
| 2213 | PI0003699     | SAP98BP             | Isomorphous of SAP98-binding protein | 32                                                                   | 0.101                                                                 | 32              | NO (active)       | True                              | False             | Active              | -      |           |                         |
| 1668 | PI0002533     | Q6R81               | CIAPIN1                              | Isomorphous of Anomorphin                                            | 32                                                                    | 2.200           | 0                 | NO (active)                       | True              | False               | Active | -         |                         |
| 1776 | PI0000826     | Q67514              | HERC2                                | Probable E3 ubiquitin-protein ligase HERC2                           | 527                                                                   | 0.007           | 0                 | NO (active)                       | False             | False               | Active | -         |                         |
| 2125 | PI0003027     | Q6V64               | CORF1                                | Uncharacterized protein (Corf1)                                      | 24                                                                    | 0.025           | 0                 | NO (active)                       | False             | False               | Active | -         |                         |
| 2157 | PI0015465     | Q8TC07              | TBC1D15                              | TBC1 domain family, member 15 isoform 1                              | 82                                                                    | 0.040           | 0                 | NO (active)                       | False             | False               | Active | -         |                         |
| 1520 | PI0012736     | Q75347              | TBCA                                 | Tubulin-specific chaperone A                                         | 13                                                                    | 0.903           | 0                 | NO (active)                       | True              | False               | Active | -         |                         |
| 1658 | PI0012773     | Q61161              | MTA1                                 | Isomorphous of Metastasis-associated protein MTA1                    | 81                                                                    | 0.084           | 0                 | NO (active)                       | True              | False               | Active | -         |                         |
| 1387 | PI0003890     | Q9ULH0              | KIDIN220                             | Isomorphous of 2 of Kinase D-interacting substrate of 220 kDa        | 186                                                                   | 0.076           | 0                 | NO (active)                       | True              | False               | Active | -         |                         |
| 1433 | PI0009290     | Q9NVA2              | SEPT11                               | Isomorphous of Septin-11                                             | 49                                                                    | 0.259           | 0                 | NO (active)                       | True              | False               | Active | -         |                         |
| 425  | PI0012654     | Q14939              | NDC2                                 | Isomorphous of Nucleolar and coiled-body phosphoprotein 1            | 75                                                                    | 0.913           | 0                 | NO (active)                       | True              | False               | Active | -         |                         |
| 934  | PI0001040     | Q9HWJ5              | SF3B5                                | Splicing factor 3B subunit 5                                         | 10                                                                    | 2.685           | 0                 | NO (active)                       | True              | False               | Active | -         |                         |
| 1098 | PI0002884     | Q2NL82              | TSR1                                 | Pre-mRNA processing protein TSR1 homolog                             | 92                                                                    | 0.221           | 0                 | NO (active)                       | True              | False               | Active | -         |                         |
| 1832 | PI0000701     | Q21450              | HSS1L                                | Isomorphous of 1 of HSS1-like proteins                               | 75                                                                    | 0.054           | 0                 | NO (active)                       | True              | False               | Active | -         |                         |
| 627  | PI0001570     | P35544              | FALU                                 | Ubiquitin-like protein falu and ribosomal protein S30 precursor      | 14                                                                    | 2.201           | 0                 | NO (active)                       | True              | False               | Active | -         |                         |
| 861  | PI0002397     | Q9H054              | DDX47                                | Probable ATP-dependent RNA helicase DDX47                            | 51                                                                    | 0.626           | 0                 | NO (active)                       | True              | False               | Active | -         |                         |
| 2215 | PI0002943     | Q65646              | GABRA9                               | GA-binding protein alpha chain                                       | 55                                                                    | 0.035           | 0                 | NO (active)                       | False             | False               | Active | -         |                         |
| 1478 | PI0012740     | Q8IWA0              | WOR5                                 | WD repeat-containing protein 75                                      | 65                                                                    | 0.080           | 0                 | NO (active)                       | True              | False               | Active | -         |                         |
| 1270 | PI0000708     | Q55478              | NSA2                                 | Ribosome biogenesis protein NSA2 homolog                             | 30                                                                    | 0.439           | 0                 | NO (active)                       | True              | False               | Active | -         |                         |
| 902  | PI0003022     | Q6G207              | WOR12                                | Ribosome biogenesis protein WOR12                                    | 48                                                                    | 0.524           | 0                 | NO (active)                       | True              | False               | Active | -         |                         |
| 2063 | PI0001028     | Q55519              | SSE11                                | Splicing factor arginine-serine-rich 11                              | 32                                                                    | 0.111           | 0                 | NO (active)                       | True              | False               | Active | -         |                         |
| 1937 | PI0002086     | Q9N015              | MRLP15                               | 39S ribosomal protein L15, mitochondrial                             | 33                                                                    | 0.153           | 0                 | NO (active)                       | True              | False               | Active | -         |                         |
| 1816 | PI0014410     | Q9NRW05             | MRLP22                               | Isomorphous of 39S ribosomal protein L22, mitochondrial              | 24                                                                    | 0.237           | 0                 | NO (active)                       | True              | False               | Active | -         |                         |
| 1796 | PI0001091     | Q61007              | DRG2                                 | Putative uncharacterized protein DRG2                                | 556                                                                   | 0.003           | 0                 | NO (active)                       | False             | False               | Active | -         |                         |
| 1792 | PI0007914     | P55039              | DRG2                                 | Putative uncharacterized protein DRG2                                | 38                                                                    | 0.066           | 0                 | NO (active)                       | False             | False               | Active | -         |                         |
| 1328 | PI0006400     | Q6XG10              | YALEF3                               | Isomorphous of 1 of Yef N-terminal domain-containing protein 3       | 33                                                                    | 0.076           | 0                 | NO (active)                       | False             | False               | Active | -         |                         |
| 918  | PI0016822     | Q9N805              | GLT2D1                               | Procollagen galactosyltransferase 1                                  | 72                                                                    | 0.346           | 0                 | NO (active)                       | True              | False               | Active | -         |                         |
| 2048 | PI0002109     | Q9C005              | DY30                                 | Protein dy30 homolog                                                 | 11                                                                    | 0.164           | 0                 | NO (active)                       | False             | False               | Active | -         |                         |
| 2111 | PI0001836     | Q9NVA2              | NPE1                                 | Nucleophosmin homolog 1                                              | 53                                                                    | 0.068           | 0                 | NO (active)                       | True              | False               | Active | -         |                         |
| 1809 | PI0002954     | Q15058              | KIF4                                 | Kinesin-like protein KIF4                                            | 69                                                                    | 0.189           | 0                 | NO (active)                       | True              | False               | Active | -         |                         |
| 1896 | PI0004832     | Q92759              | DRG2                                 | Putative uncharacterized protein DRG2                                | 38                                                                    | 0.066           | 0                 | NO (active)                       | False             | False               | Active | -         |                         |
| 1941 | PI0001839     | Q92759              | DRG2                                 | Putative uncharacterized protein DRG2                                | 38                                                                    | 0.066           | 0                 | NO (active)                       | False             | False               | Active | -         |                         |
| 1712 | PI0016496     | Q11318              | PIRHA                                | General transcription factor III subunit 4                           | 52                                                                    | 0.090           | 0                 | NO (active)                       | True              | False               | Active | YES       |                         |
| 2189 | PI0001420     | Q07021              | C1QB                                 | Complement component 1 Q subcomponent-binding protein, mitochondrial | 31                                                                    | 0.065           | 0                 | NO (active)                       | False             | False               | Active | -         |                         |
| 2107 | PI0003467     | Q9H392              | WHS2                                 | Wolf-Hirschhorn syndrome candidate 2-binding protein                 | 59                                                                    | 0.043           | 0                 | NO (active)                       | True              | False               | Active | -         |                         |
| 1725 | PI0002921     | Q25457              | TOPBP1                               | DNA topoisomerase 2-binding protein 1                                | 136                                                                   | 0.029           | 0                 | NO (active)                       | True              | False               | Active | -         |                         |
| 1983 | PI0007808     | Q14254              | FLOT2                                | FLOT2                                                                | 47                                                                    | 0.086           | 0                 | NO (active)                       | True              | False               | Active | -         |                         |
| 1567 | PI0006493     | Q9691               | EP400                                | Isomorphous of E1A-binding protein p400                              | 340                                                                   | 0.017           | 0                 | NO (active)                       | True              | False               | Active | -         |                         |
| 1613 | PI0000769     | Q14807              | KIF23                                | Kinesin-like protein KIF23                                           | 73                                                                    | 0.092           | 0                 | NO (active)                       | True              | False               | Active | -         |                         |
| 1561 | PI0002176     | Q8Y181              | FTS3                                 | Putative RNA methyltransferase 3                                     | 97                                                                    | 0.071           | 0                 | NO (active)                       | True              | False               | Active | -         |                         |
| 1891 | PI0009749     | Q6M67               | WFS12                                | Zinc finger protein 512                                              | 65                                                                    | 0.039           | 0                 | NO (active)                       | True              | False               | Active | -         |                         |
| 1044 | PI0007946     | Q23044              | STIP3                                | STIP3 protein                                                        | 68                                                                    | 0.286           | 0                 | NO (active)                       | True              | False               | Active | -         |                         |
| 904  | PI0003813     | Q9H8H0              | NOL11                                | Nucleolar protein 11                                                 | 81                                                                    | 0.275           | 0                 | NO (active)                       | True              | False               | Active | -         |                         |
| 2382 | PI00064171    | Q14151              | WRN                                  | Putative uncharacterized protein RPL179P                             | 21                                                                    | 1.272           | 0                 | NO (active)                       | False             | False               | Active | -         |                         |
| 1824 | PI0002107     | Q14809              | WRN                                  | Werner syndrome ATP-dependent helicase                               | 163                                                                   | 0.033           | 163               | NO (active)                       | True              | False               | Active | -         |                         |
| 1839 | PI0007415     | Q8H2U1              | DKH36                                | Isomorphous of Probable ATP-dependent RNA helicase DKH36             | 115                                                                   | 0.034           | 0                 | NO (active)                       | True              | False               | Active | -         |                         |
| 1794 | PI0006153     | Q6E613              | MRLP35                               | 39S ribosomal protein L35, mitochondrial                             | 12                                                                    | 0.462           | 0                 | NO (active)                       | True              | False               | Active | -         |                         |
| 937  | PI0002028     | Q9N919              | UTP6                                 | U3 small nucleolar RNA-associated protein 6 homolog                  | 70                                                                    | 0.258           | 0                 | NO (active)                       | True              | False               | Active | -         |                         |
| 2217 | PI0003541     | Q9N497              | TIMELSS                              | Isomorphous of Protein timeless homolog                              | 139                                                                   | 0.010           | 0                 | NO (active)                       | False             | False               | Active | -         |                         |
| 2143 | PI0002030     | Q9N913              | ACT103                               | Acyl-coenzyme A thioesterase 13                                      | 15                                                                    | 2.020           | 0                 | NO (active)                       | False             | False               | Active | -         |                         |
| 2075 | PI0003880     | Q13766              | RPN2                                 | ribophosin II isoform 2 precursor                                    | 68                                                                    | 0.062           | 0                 | NO (active)                       | False             | False               | Active | -         |                         |
| 1862 | PI0004014     | Q13616              | DCM4                                 | 50 kDa protein                                                       | 50                                                                    | 0.199           | 0                 | NO (active)                       | True              | False               | Active | -         |                         |
| 1766 | PI0003293     | Q8Y183              | SRM1                                 | Serine/arginine repetitive matrix protein 1                          | 104                                                                   | 0.058           | 0                 | NO (active)                       | True              | False               | Active | -         |                         |
| 1649 | PI0003617     | P42696              | RBM34                                | Isomorphous of RNA-binding protein 34                                | 49                                                                    | 0.146           | 0                 | NO (active)                       | True              | False               | Active | -         |                         |
| 1207 | PI0003021     | Q11171              | EPH4                                 | Isomorphous of Protein tyrosine kinase 4                             | 92                                                                    | 0.171           | 0                 | NO (active)                       | True              | False               | Active | -         |                         |
| 2208 | PI0001906     | P35613              | BSG                                  | Isomorphous of 2 of Basigin                                          | 29                                                                    | 0.122           | 0                 | NO (active)                       | False             | False               | Active | -         |                         |
| 1954 | PI0008400     | Q94874              | KIAA0776                             | Isomorphous of E3 UFM1-protein ligase 1                              | 90                                                                    | 0.047           | 0                 | NO (active)                       | True              | False               | Active | -         |                         |
| 1569 | PI0004290     | Q48600              | DEF                                  | Digitonin-sugar expansion factor homolog                             | 83                                                                    | 0.099           | 0                 | NO (active)                       | True              | False               | Active | -         |                         |
| 1365 | PI0002128     | P04080              | CSTB                                 | Cystatin B                                                           | 11                                                                    | 1.237           | 0                 | NO (active)                       | True              | False               | Active | -         |                         |
| 1481 | PI0006474     | Q9Y5Y2              | NUP87                                | Cytosolic Fe-S cluster assembly factor NUP87                         | 29                                                                    | 0.112           | 0                 | NO (active)                       | True              | False               | Active | -         |                         |
| 1713 | PI0007681     | Q8Y811              | KIF18B                               | Kinesin family member 18B                                            | 93                                                                    | 0.027           | 0                 | NO (active)                       | True              | False               | Active | -         |                         |
| 1604 | PI0001316     | P82650              | MRLP22                               | 28S ribosomal protein S22, mitochondrial                             | 41                                                                    | 0.221           | 0                 | NO (active)                       | True              | False               | Active | -         |                         |
| 1641 | PI0001104     | P61024              | CX518                                | Cyclin-dependent kinase regulatory subunit 1                         | 10                                                                    | 0.576           | 0                 | NO (active)                       | True              | False               | Active | -         |                         |
| 1679 | PI0002179     | Q8U052              | EN2C                                 | Isomorphous of E1A/Rb/MS2-interacting/CAF2 family member 1           | 28                                                                    | 0.055           | 0                 | NO (active)                       | True              | False               | Active | -         |                         |
| 1243 | PI0002102     | Q8N8F6              | AVL9                                 | Isomorphous of 2 of Late secretory pathway protein AVL9 homolog      | 65                                                                    | 0.031           | 0                 | NO (active)                       | False             | False               | Active | -         |                         |
| 742  | PI00009471    | Q9JUN4              | WDR3                                 | WD repeat-containing protein 3                                       | 106                                                                   | 0.231           | 0                 | NO (active)                       | True              | False               | Active | -         |                         |
| 2251 | PI0001178     | Q14807              | RBM21                                | RNA-binding motif protein 2, like 1                                  | 36                                                                    | 0.018           | 0                 | NO (active)                       | True              | False               | Active | -         |                         |
| 696  | PI0001188     | Q9Y379              | NOCL2                                | Nucleolar complex protein 2 homolog                                  | 85                                                                    | 0.337           | 0                 | NO (active)                       | True              | False               | Active | -         |                         |
| 2343 | PI0002913     | Q67566              | HGFC4                                | Hepatocyte growth factor activator                                   | 71                                                                    | 0.036           | 0                 | NO (active)                       | True              | False               | Active | -         |                         |
| 2097 | PI0002699     | Q97996              | THBS3                                | Thrombospondin 3                                                     | 117                                                                   | 0.029           | 0                 | NO (active)                       | True              | False               | Active | -         |                         |
| 1846 | PI0000660     | Q95831              | AFM1                                 | Isomorphous of Apoptosis-inducing factor 1, mitochondrial            | 67                                                                    | 0.060           | 0                 | NO (active)                       | True              | False               | Active | -         |                         |
| 1855 | PI0002903     | Q05005              | KPN3                                 | Isomorphous of Nucleolar protein alpha 3                             | 58                                                                    | 0.099           | 0                 | NO (active)                       | True              | False               | Active | -         |                         |
| 869  | PI0006627     | Q6G617              | CCDC124                              | Coiled-coil domain-containing protein 124                            | 26                                                                    | 0.778           | 26                | NO (active)                       | True              | False               | Active | -         |                         |
| 2240 | PI0001073     | Q9N161              | COMM                                 | COMM domain-containing protein 3                                     | 22                                                                    | 0.115           | 0                 | NO (active)                       | True              | False               | Active | -         |                         |
| 1719 | PI0007400     | Q9N805              | GNS3                                 | Isomorphous of DNA replication complex GINS protein PSF3             | 25                                                                    | 0.115           | 0                 | NO (active)                       | True              | False               | Active | -         |                         |
| 2124 | PI0006552     | Q9JW11              | CND17                                | CCR4-NOT transcription complex subunit 7                             | 33                                                                    | 0.199           | 0                 | NO (active)                       | True              | False               | Active | -         |                         |
| 1848 | PI0002546     | P64802              | PAH4182                              | Platelet-activating factor acetylhydrolase B subunit beta            | 30                                                                    | 0.219           | 0                 | NO (active)                       | True              | False               | Active | -         |                         |
| 1887 | PI00038531    | Q9JUN4              | ZMYND8                               | Isomorphous of 2 of Protein kinase C-binding protein 1               | 67                                                                    | 0.070           | 0                 | NO (active)                       | True              | False               | Active | -         |                         |
| 1910 | PI00010748    | Q9JUN4              | HSP70                                | Hsp70-binding protein 1                                              | 44                                                                    | 0.116           | 0                 | NO (active)                       | True              | False               | Active | -         |                         |
| 1291 | PI0003070     | Q13616              | DCM4                                 | Isomorphous of 50 kDa protein                                        | 50                                                                    | 0.197           | 0                 | NO (active)                       | True              | False               | Active | -         |                         |
| 2202 | PI00018139    | Q9N500              | SFRS2P                               | Isomorphous of SFRS2-interacting protein                             | 129                                                                   | 0.011           | 0                 | NO (active)                       | False             | False               | Active | -         |                         |
| 1775 | PI0002931     | PPR310              | PPR310                               | Serine/threonine-protein phosphatase 1 regulatory subunit 10         | 99                                                                    | 0.033           | 0                 | NO (active)                       | True              | False               | Active | -         |                         |
| 1350 | PI0004421     | Q15291              | CFP1                                 | Isomorphous of 1 of Cytosolic F-actin-binding interacting protein 1  | 145                                                                   | 0.039           | 0                 | NO (active)                       | True              | False               | Active | -         |                         |
| 2086 | PI00031489    | P06132              | UROD                                 | Uroporphyrinogen decarboxylase                                       | 41                                                                    | 0.111           | 0                 | NO (active)                       | True              | False               | Active | -         |                         |
| 1788 | PI00074787    | P42695              | NACPO3                               | Uncoupling-2 complex subunit D3                                      | 169                                                                   | 0.021           | 0                 | NO (active)                       | True              | False               | Active | -         |                         |
| 1390 | PI00052708    | Q8T800              | UTP5D                                | U3 small nucleolar RNA-associated protein 15 homolog                 | 55                                                                    | 0.025           | 0                 | NO (active)                       | True              | False               | Active | -         |                         |
| 2342 | PI00027241    | Q60827              | URB1                                 | Nucleolar pre-ribosomal-associated protein 1                         | 254                                                                   | 0.087           | 0                 | NO (active)                       | True              | False               | Active | -         |                         |
| 911  | PI00002646    | Q8UB89              | UXT                                  | Protein UXT                                                          | 18                                                                    | 0.140           | 0                 | NO (active)                       | True              | False               | Active | -         |                         |
| 771  | PI00051073    | Q60213              | DKH16                                | Putative pre-mRNA-splicing factor ATP-dependent RNA helicase DKH16   | 119                                                                   | 0.205           | 0                 | NO (active)                       | True              | False               | Active | -         |                         |
| 840  | PI00013891    | Q13595              | TRA2A                                | Isomorphous of Long of Transformer-2 protein homolog alpha           | 33                                                                    | 0.958           | 0                 | NO (active)                       | True              | False               | Active | -         |                         |
| 2141 | PI00079749    | Q12846              | STX4                                 | Syntaxin 4 (Placental), isoform CRA_c                                | 34                                                                    | 0.133           | 0                 | NO (active)                       | True              | False               | Active | -         |                         |
| 1462 | PI0001177     | Q14809              | SEPT2                                | Isomorphous of 1 of Septin-2                                         | 42                                                                    | 0.260           | 0                 | NO (active)                       | True              | False               | Active | -         |                         |
| 1867 | PI00003194    | Q16637              | SMN1                                 | Isomorphous of SMN of Survival motor neuron protein                  | 32                                                                    | 0.079           | 0                 | NO (active)                       | True              | False               | Active | -         |                         |
| 1818 | PI0002929     | Q14258              | TRIM25                               | E3 ubiquitin ligase TRIM25                                           | 71                                                                    | 0.086           | 0                 | NO (active)                       | True              | False               | Active | -         |                         |
| 1853 | PI0001901     | Q15611              | AD21                                 | Isomorphous of 1 of Alpha-2-macroglobin                              | 81                                                                    | 0.073           | 0                 | NO (active)                       | True              | False               | Active | -         |                         |
| 1859 | PI00008274    | Q01518              | CAP1                                 | Isomorphous of Adenylyl cyclase-associated protein 1                 | 52                                                                    | 0.155           | 0                 | NO (active)                       | True              | False               | Active | -         |                         |
| 1449 | PI00045429    | P62987              | UBA52                                | Ubiquitin and ribosome protein L40 precursor                         | 15                                                                    | 18.649          | 0                 | NO (active)                       | True              | False               | Active | -         |                         |
| 844  | PI00029098    | Q9N919              | SMR8                                 | Signal recognition particle receptor subunit beta                    | 32                                                                    | 0.072           | 0                 | NO (active)                       | True              | False               | Active | -         |                         |
| 2154 | PI00016230    | Q9E21               | MRLP37                               | 39S ribosomal protein L37, mitochondrial                             | 48                                                                    | 0.042           | 0                 | NO (active)                       | True              | False               | Active | -         |                         |
| 1979 | PI00034159    | P61421              | ATP6V0D1                             | V-type protein ATPase subunit d 1                                    | 40                                                                    | 0.189           | 0                 | NO (active)                       | True              | False               | Active | -         |                         |
| 1784 | PI00024408    | Q12830              | BTF1                                 | Isomorphous of 2 of Nucleosome-remodeling factor subunit BTF1        | 325                                                                   | 0.038           | 0                 | NO (active)                       | False             | False               | Active | -         |                         |
| 1793 | PI00029331    | Q9N912              | POP1                                 | Ribonuclease P/MRP protein subunit POP1                              | 119                                                                   | 0.047           | 0                 | NO (active)                       | True              | False               | Active | -         |                         |
| 1764 | PI00033984    | Q8TC12              | RDH11                                | Isomorphous of 1 of Retinol dehydrogenase 11                         | 35                                                                    | 0.173           | 0                 | NO (active)                       | True              | False               | Active | -         |                         |
| 1895 | PI00031461    | Q9J395              | GDJ2                                 | Rap GTP dissociation inhibitor beta                                  | 51                                                                    | 0.138           | 0                 | NO (active)                       | True              | False               | Active | -         |                         |
| 1713 | PI00025       |                     |                                      |                                                                      |                                                                       |                 |                   |                                   |                   |                     |        |           |                         |

Supplementary Table 1 (cont.) | Hierarchical clustering analysis of proteins identified in active or inactive integrin adhesion complexes.

| #    | IPi Accession | UniProtKB Accession | Gene name | Protein name                                                                                                    | Protein MW (kDa) | Relative abundance (mean normalized spectral count) × 10 <sup>3</sup> |          |                       | Fold enrichment (active/inactive) |          | Cluster* | Adhesome* | Hierarchical clustering |
|------|---------------|---------------------|-----------|-----------------------------------------------------------------------------------------------------------------|------------------|-----------------------------------------------------------------------|----------|-----------------------|-----------------------------------|----------|----------|-----------|-------------------------|
|      |               |                     |           |                                                                                                                 |                  | Active                                                                | Inactive | Integrin <sup>†</sup> | Active                            | Inactive |          |           |                         |
| 1162 | IP00032957    | P63279              | UBE2I     | SUMO-conjugating enzyme UBE2I                                                                                   | 18               | 0.632                                                                 | 0        | NO (active)           | True                              | False    | Active   | -         |                         |
| 1517 | IP00305492    | Q43396              | TYRKL     | Threonine-like protein 5                                                                                        | 32               | 0.212                                                                 | 0        | NO (active)           | True                              | False    | Active   | -         |                         |
| 1935 | IP00854619    | Q9NS58              | SAMSN1    | Putative uncharacterized protein SAMSN1                                                                         | 50               | 0.108                                                                 | 0        | NO (active)           | False                             | False    | Active   | -         |                         |
| 1767 | IP00840414    | Q17280              | Cblor114  | Uncharacterized protein Cblor114                                                                                | 42               | 0.137                                                                 | 0        | NO (active)           | True                              | False    | Active   | -         |                         |
| 1779 | IP0014832     | Q9H822              | ITRM6     | Islet 1 of Tropicamide motif-containing protein 56                                                              | 81               | 0.018                                                                 | 0        | NO (active)           | False                             | False    | Active   | -         |                         |
| 1829 | IP00040155    | Q49426              | GLV1      | Islet 1 of Putative oxidoreductase GLV1                                                                         | 61               | 0.083                                                                 | 0        | NO (active)           | True                              | False    | Active   | -         |                         |
| 2066 | IP00101659    | Q96P11              | NSUN5     | Islet 2 of Putative methyltransferase NSUN5                                                                     | 50               | 0.058                                                                 | 0        | NO (active)           | False                             | False    | Active   | -         |                         |
| 2105 | IP00212116    | P48912              | TSN4      | Islet 1 of Elongation factor 1c, mitochondrial                                                                  | 25               | 0.095                                                                 | 0        | NO (active)           | True                              | False    | Active   | -         |                         |
| 2215 | IP00384122    | Q80T77              | DLST      | Dihydrolyipolysine-residue succinyl-proteinase component of 2-oxoglutarate dehydrogenase complex, mitochondrial | 40               | 0.063                                                                 | 0        | NO (active)           | False                             | False    | Active   | -         |                         |
| 2244 | IP00303106    | Q98773              | PSMG3     | Proteasome assembly chaperone 3                                                                                 | 13               | 0.194                                                                 | 0        | NO (active)           | True                              | False    | Active   | -         |                         |
| 1959 | IP00143566    | NDUFA6              | NDUFA6    | NADH dehydrogenase (ubiquinone) 1 alpha subcomplex, 6                                                           | 18               | 0.230                                                                 | 0        | NO (active)           | True                              | False    | Active   | -         |                         |
| 1984 | IP00220317    | P09884              | POLA1     | DNA polymerase alpha catalytic subunit                                                                          | 166              | 0.015                                                                 | 0        | NO (active)           | True                              | False    | Active   | -         |                         |
| 1288 | IP00027898    | Q9NS22              | C21orf70  | Islet 1 of Uncharacterized protein C21orf70                                                                     | 25               | 0.432                                                                 | 0        | NO (active)           | True                              | False    | Active   | -         |                         |
| 997  | IP0015838     | Q9N938              | LYAR      | Cell growth-regulating nuclear protein                                                                          | 40               | 0.326                                                                 | 0        | NO (active)           | True                              | False    | Active   | -         |                         |
| 1004 | IP00202860    | P55209              | NAP111    | Nucleosome assembly protein 1-like 1                                                                            | 45               | 0.360                                                                 | 0        | NO (active)           | True                              | False    | Active   | -         |                         |
| 2175 | IP00007812    | P21281              | ATP6V1B2  | V-type proton ATPase subunit B, brain isoform                                                                   | 57               | 0.044                                                                 | 0        | NO (active)           | False                             | False    | Active   | -         |                         |
| 965  | IP00399996    | Q70703              | RGM7TD1   | Mitochondrial ribonuclease P protein 4                                                                          | 47               | 0.423                                                                 | 0        | NO (active)           | True                              | False    | Active   | -         |                         |
| 1217 | IP00185146    | Q96P70              | IMPOT9    | Importin 9                                                                                                      | 116              | 0.099                                                                 | 0        | NO (active)           | True                              | False    | Active   | -         |                         |
| 1761 | IP00060606    | Q98Y98              | MRSM26    | 28S ribosomal protein S26, mitochondrial                                                                        | 24               | 0.282                                                                 | 0        | NO (active)           | True                              | False    | Active   | -         |                         |
| 1880 | IP00111118    | P31350              | RRM2      | ribonucleotide reductase M2 polypeptide isoform 1                                                               | 51               | 0.057                                                                 | 0        | NO (active)           | True                              | False    | Active   | -         |                         |
| 970  | IP00250708    | Q96607              | DDX27     | Probable ATP-dependent RNA helicase DDX27                                                                       | 20               | 0.238                                                                 | 0        | NO (active)           | True                              | False    | Active   | -         |                         |
| 2212 | IP00431082    | Q96C22              | HAUS1     | Islet 1 of HAUS augmin-like complex subunit 1                                                                   | 32               | 0.085                                                                 | 0        | NO (active)           | False                             | False    | Active   | -         |                         |
| 1971 | IP00217104    | Q9M6G7              | NLN2L2    | Melanoma-associated antigen G1                                                                                  | 34               | 0.085                                                                 | 0        | NO (active)           | True                              | False    | Active   | -         |                         |
| 1615 | IP00000726    | Q9H441              | NMNAT1    | Nicotinamide mononucleotide adenylyltransferase 1                                                               | 52               | 0.257                                                                 | 0        | NO (active)           | True                              | False    | Active   | -         |                         |
| 2281 | IP00219538    | P06746              | POLB      | DNA polymerase beta                                                                                             | 38               | 0.076                                                                 | 0        | NO (active)           | True                              | False    | Active   | -         |                         |
| 2120 | IP0024567     | Q9N2M5              | GLTSCR2   | Glioma tumor suppressor candidate region 2 protein                                                              | 54               | 0.027                                                                 | 0        | NO (active)           | False                             | False    | Active   | -         |                         |
| 1933 | IP00160421    | Q9H945              | MRLP3     | 39S ribosomal protein L38, mitochondrial                                                                        | 47               | 0.244                                                                 | 0        | NO (active)           | True                              | False    | Active   | -         |                         |
| 1423 | IP00005705    | P36873              | PPP1CC    | Islet 1 of Serine/threonine-protein phosphatase PP1 gamma catalytic subunit                                     | 37               | 0.458                                                                 | 0        | NO (active)           | False                             | False    | Active   | -         |                         |
| 1414 | IP00413100    | Q98UJ1              | PLD8E1    | Islet 1 of Flecitin homology-like domain family B member 1                                                      | 151              | 0.097                                                                 | 0        | NO (active)           | True                              | False    | Active   | -         |                         |
| 2200 | IP00101962    | Q9P055              | COX2C137  | Colic acid oxidase                                                                                              | 20               | 0.104                                                                 | 0        | NO (active)           | False                             | False    | Active   | -         |                         |
| 1656 | IP00005740    | Q43402              | COX4NB    | Neighbor of COX4                                                                                                | 24               | 0.234                                                                 | 0        | NO (active)           | True                              | False    | Active   | -         |                         |
| 1669 | IP00306400    | Q98W19              | KPC1      | Kinesin-like protein KPC1                                                                                       | 74               | 0.073                                                                 | 0        | NO (active)           | True                              | False    | Active   | -         |                         |
| 1946 | IP0042862     | Q98W45              | PRLA      | Peglyl-prolyl-cis-trans isomerase like 4                                                                        | 32               | 0.076                                                                 | 0        | NO (active)           | True                              | False    | Active   | -         |                         |
| 1972 | IP00329594    | Q9P031              | CCDC59    | Thyroid transcription factor 1-associated protein 26                                                            | 29               | 0.112                                                                 | 0        | NO (active)           | True                              | False    | Active   | -         |                         |
| 1879 | IP00329692    | P30419              | NMT1      | Islet 1 of Glycylpeptide N-tetradecanoyltransferase 1                                                           | 57               | 0.102                                                                 | 0        | NO (active)           | True                              | False    | Active   | -         |                         |
| 1990 | IP00304803    | Q9H919              | GAPR3     | GAP repeat sequence                                                                                             | 37               | 0.054                                                                 | 0        | NO (active)           | False                             | False    | Active   | -         |                         |
| 2043 | IP00945795    | P43307              | SSR1      | Putative uncharacterized protein SSR1                                                                           | 30               | 0.185                                                                 | 0        | NO (active)           | False                             | False    | Active   | -         |                         |
| 1122 | IP00219871    | Q95777              | LSM8      | U6 snRNA-associated 5m-like protein LSM8                                                                        | 10               | 1.447                                                                 | 0        | NO (active)           | True                              | False    | Active   | -         |                         |
| 1761 | IP00008437    | Q9H919              | PLD8E1    | Probable ribosome biogenesis protein PLD8E1                                                                     | 20               | 0.220                                                                 | 0        | NO (active)           | True                              | False    | Active   | -         |                         |
| 1029 | IP0015196     | P78346              | RP30      | Ribonuclease P protein subunit p30                                                                              | 29               | 0.522                                                                 | 0        | NO (active)           | True                              | False    | Active   | -         |                         |
| 1349 | IP00303099    | Q93H42              | CDCAF     | Borealin                                                                                                        | 31               | 0.555                                                                 | 0        | NO (active)           | True                              | False    | Active   | -         |                         |
| 1945 | IP00164422    | Q9H919              | ZCNCB     | Islet 2 of Zinc finger CCHC domain-containing protein 8                                                         | 51               | 0.071                                                                 | 0        | NO (active)           | True                              | False    | Active   | -         |                         |
| 973  | IP00791325    | Q15387              | KIAA0020  | Pumilio domain-containing protein KIAA0020                                                                      | 17               | 0.215                                                                 | 0        | NO (active)           | True                              | False    | Active   | -         |                         |
| 2120 | IP00087759    | Q14686              | MLL2      | 564 kDa protein                                                                                                 | 564              | 0.003                                                                 | 0        | NO (active)           | False                             | False    | Active   | -         |                         |
| 1869 | IP00007828    | Q17031              | CLKP      | ATP-dependent Ctp proteinase ATP-binding subunit ctp-like, mitochondrial                                        | 60               | 0.059                                                                 | 0        | NO (active)           | True                              | False    | Active   | -         |                         |
| 1616 | IP00294575    | P30360              | COX7      | Cytochrome c oxidase subunit 7, mitochondrial                                                                   | 92               | 0.043                                                                 | 0        | NO (active)           | True                              | False    | Active   | -         |                         |
| 2206 | IP00290514    | Q9N988              | INT59     | Integrator complex subunit 9                                                                                    | 74               | 0.019                                                                 | 0        | NO (active)           | False                             | False    | Active   | -         |                         |
| 2214 | IP00328257    | Q10607              | APB1      | Islet 1 of AP-1 complex subunit beta-1                                                                          | 105              | 0.456                                                                 | 0        | NO (active)           | True                              | False    | Active   | -         |                         |
| 1708 | IP0045449     | Q9W065              | RAO2B8    | UV excision repair protein RAO2B homolog B                                                                      | 42               | 0.111                                                                 | 0        | NO (active)           | True                              | False    | Active   | -         |                         |
| 1786 | IP0020091     | P61158              | ACTR3     | Actin-related protein 3                                                                                         | 47               | 0.139                                                                 | 0        | NO (active)           | True                              | False    | Active   | -         |                         |
| 1526 | IP00221226    | Q15213              | WR46      | WD repeat-containing protein 46                                                                                 | 68               | 0.053                                                                 | 0        | NO (active)           | True                              | False    | Active   | -         |                         |
| 1949 | IP00012462    | Q9H441              | EF2A      | Eukaryotic translation initiation factor 2A                                                                     | 60               | 0.053                                                                 | 0        | NO (active)           | True                              | False    | Active   | -         |                         |
| 2177 | IP00010653    | Q9G282              | REK4      | Islet 1 of RNA exonuclease 4                                                                                    | 47               | 0.054                                                                 | 0        | NO (active)           | True                              | False    | Active   | -         |                         |
| 1737 | IP00000296    | Q98W19              | C3orf10   | Islet 1 of Probable protein BRCK1                                                                               | 9                | 0.392                                                                 | 0        | NO (active)           | True                              | False    | Active   | -         |                         |
| 1945 | IP00008248    | Q9H919              | ANAPC1    | Anaphase-promoting complex subunit 7, isoform A                                                                 | 67               | 0.194                                                                 | 0        | NO (active)           | True                              | False    | Active   | -         |                         |
| 1944 | IP00106502    | Q14145              | KEAP1     | Kelch-like ECH-associated protein 1                                                                             | 70               | 0.072                                                                 | 0        | NO (active)           | True                              | False    | Active   | YES       |                         |
| 1994 | IP00219005    | Q02790              | F8BP4     | Peglyl-prolyl-cis-trans isomerase F8BP4                                                                         | 52               | 0.039                                                                 | 0        | NO (active)           | False                             | False    | Active   | -         |                         |
| 1527 | IP0021438     | Q19527              | FLT3      | Fms-like tyrosine kinase 3                                                                                      | 47               | 0.168                                                                 | 0        | NO (active)           | True                              | False    | Active   | -         |                         |
| 1976 | IP0010845     | Q00217              | NDUFS8    | NADH dehydrogenase (ubiquinone) iron-sulfur protein 8, mitochondrial                                            | 24               | 0.168                                                                 | 0        | NO (active)           | True                              | False    | Active   | -         |                         |
| 1471 | IP00553153    | Q9HJ22              | ATP1F1    | Putative uncharacterized protein DKF26564G0422                                                                  | 12               | 0.756                                                                 | 0        | NO (active)           | True                              | False    | Active   | -         |                         |
| 1741 | IP00021255    | Q9H811              | LRB4      | Islet 1 of Uppolysaccharidase-responsive and hege-like anchor protein                                           | 50               | 0.073                                                                 | 0        | NO (active)           | True                              | False    | Active   | -         |                         |
| 1446 | IP00023591    | Q00577              | PURA      | Transcriptional activator protein Pur-alpha                                                                     | 35               | 0.253                                                                 | 0        | NO (active)           | True                              | False    | Active   | -         |                         |
| 1738 | IP00024043    | Q98Y01              | MRLP13    | 39S ribosomal protein L13, mitochondrial                                                                        | 21               | 0.312                                                                 | 0        | NO (active)           | True                              | False    | Active   | -         |                         |
| 1573 | IP00032255    | Q05058              | PD03      | Procollagen lyase-2, oxoglutarate 5-dioxygenase 3                                                               | 37               | 0.073                                                                 | 0        | NO (active)           | True                              | False    | Active   | -         |                         |
| 1652 | IP00032799    | Q9H919              | Q9H919    | 37 kDa protein                                                                                                  | 37               | 0.185                                                                 | 0        | NO (active)           | True                              | False    | Active   | -         |                         |
| 1736 | IP00328170    | Q13724              | MOGS      | Mannosyl-oligosaccharide glucosidase                                                                            | 92               | 0.035                                                                 | 0        | NO (active)           | True                              | False    | Active   | -         |                         |
| 1282 | IP00166865    | Q9H811              | CS2D      | CGSD (iron sulfur domain-containing) protein 2                                                                  | 60               | 0.178                                                                 | 0        | NO (active)           | True                              | False    | Active   | -         |                         |
| 1789 | IP00029159    | P49559              | MRE11A    | DOUBLE-STRAND BREAK REPAIR PROTEIN MRE11A                                                                       | 81               | 0.286                                                                 | 0        | NO (active)           | True                              | False    | Active   | -         |                         |
| 2231 | IP00010244    | Q92912              | MRSF11    | Islet 1 of 28S ribosomal protein S11, mitochondrial                                                             | 21               | 0.168                                                                 | 0        | NO (active)           | False                             | False    | Active   | -         |                         |
| 2167 | IP00221479    | Q9H919              | HEICL     | Putative uncharacterized protein HEICL                                                                          | 33               | 0.005                                                                 | 0        | NO (active)           | True                              | False    | Active   | -         |                         |
| 1900 | IP00168165    | Q75122              | CLASP2    | CLASP2 protein                                                                                                  | 166              | 0.038                                                                 | 0        | NO (active)           | True                              | False    | Active   | -         |                         |
| 1902 | IP00005657    | Q15212              | PF06      | Prefoldin subunit 6                                                                                             | 15               | 0.120                                                                 | 0        | NO (active)           | False                             | False    | Active   | -         |                         |
| 1347 | IP00025640    | Q14737              | PCDO5     | Programmed cell death protein 5                                                                                 | 14               | 1.162                                                                 | 0        | NO (active)           | True                              | False    | Active   | -         |                         |
| 2183 | IP00063827    | Q9H441              | ABHD4B    | Islet 1 of ABHD4B domain-containing protein 14B                                                                 | 20               | 0.098                                                                 | 0        | NO (active)           | True                              | False    | Active   | -         |                         |
| 2228 | IP00032911    | P62380              | TBR1      | TATA box-binding protein-like protein 1                                                                         | 21               | 0.120                                                                 | 0        | NO (active)           | True                              | False    | Active   | -         |                         |
| 1828 | IP00306719    | Q98W59              | CHD1      | chromatin remodeler CHD1                                                                                        | 51               | 0.064                                                                 | 0        | NO (active)           | True                              | False    | Active   | -         |                         |
| 3870 | IP00191364    | P63305              | SKP1      | Islet 1 of E3-ubiquitin-protein ligase SKP1                                                                     | 21               | 0.099                                                                 | 0        | NO (active)           | True                              | False    | Active   | -         |                         |
| 2107 | IP00141816    | Q15603              | MRLP2     | 39S ribosomal protein L2, mitochondrial                                                                         | 33               | 0.100                                                                 | 0        | NO (active)           | True                              | False    | Active   | -         |                         |
| 2050 | IP00291238    | P15804              | NDUPE2    | NADH dehydrogenase (ubiquinone) flavoprotein 2, mitochondrial                                                   | 27               | 0.080                                                                 | 0        | NO (active)           | False                             | False    | Active   | -         |                         |
| 2181 | IP00306446    | Q17028              | ZNF4      | Zinc finger protein 24                                                                                          | 42               | 0.034                                                                 | 0        | NO (active)           | True                              | False    | Active   | -         |                         |
| 1199 | IP00294211    | Q26220              | HKX38     | Pre-mRNA-splicing factor ATP-dependent RNA helicase PRP16                                                       | 141              | 0.061                                                                 | 0        | NO (active)           | True                              | False    | Active   | -         |                         |
| 1141 | IP00087498    | Q56409              | ESCO2     | N-acyltransferase ESCO2                                                                                         | 68               | 0.042                                                                 | 0        | NO (active)           | False                             | False    | Active   | -         |                         |
| 1601 | IP00141451    | P39237              | SERPINE6  | Serpin B6                                                                                                       | 68               | 0.192                                                                 | 0        | NO (active)           | False                             | False    | Active   | -         |                         |
| 1737 | IP00783302    | Q96V77              | PTCD3     | Islet 1 of Pentatricopeptide repeat-containing protein 3, mitochondrial                                         | 79               | 0.071                                                                 | 0        | NO (active)           | True                              | False    | Active   | -         |                         |
| 1903 | IP00795263    | Q98G46              | DNAAK19   | Putative uncharacterized protein DNAAK19                                                                        | 10               | 0.216                                                                 | 0        | NO (active)           | False                             | False    | Active   | -         |                         |
| 1918 | IP00021578    | Q9NS28              | KPNAB     | Importin subunit alpha-4                                                                                        | 50               | 0.056                                                                 | 0        | NO (active)           | True                              | False    | Active   | -         |                         |
| 1942 | IP00018463    | Q9Y307              | TM6M2     | Mitochondrial import inner membrane translocator Tim16                                                          | 14               | 0.360                                                                 | 0        | NO (active)           | True                              | False    | Active   | -         |                         |
| 1957 | IP00104177    | Q17283              | PING1     | Islet 1 of Pogo transposable element with ZNF domain                                                            | 155              | 0.033                                                                 | 0        | NO (active)           | True                              | False    | Active   | -         |                         |
| 1655 | IP00186474    | Q9H919              | FAM127A   | Protein FAM127A                                                                                                 | 13               | 0.255                                                                 | 0        | NO (active)           | True                              | False    | Active   | -         |                         |
| 1809 | IP00298828    | P02749              | AP0H      | Beta-2-glycoprotein 1                                                                                           | 38               | 0.093                                                                 | 0        | NO (active)           | False                             | False    | Active   | -         |                         |
| 2000 | IP00496705    | Q9V829              | MORC3     | MORC Family CW-type zinc finger 3                                                                               | 107              | 0.020                                                                 | 0        | NO (active)           | False                             | False    | Active   | -         |                         |
| 2127 | IP00212921    | Q56134              | ATP5J2    | Putative uncharacterized protein ATP5J2                                                                         | 11               | 0.121                                                                 | 0        | NO (active)           | True                              | False    | Active   | -         |                         |
| 1177 | IP00007729    | Q9UMY1              | NOL7      | Islet 1 of Nuclear pore protein 7                                                                               | 29               | 0.472                                                                 | 0        | NO (active)           | True                              | False    | Active   | -         |                         |
| 2165 | IP00505095    | Q9NWS0              | PHI1      | PHI1 domain-containing protein 1                                                                                | 32               | 0.063                                                                 | 0        | NO (active)           | True                              | False    | Active   | -         |                         |
| 1143 | IP00000948    | Q9Y493              | TBL2      | Transducin beta-like protein 2                                                                                  | 10               | 0.386                                                                 | 0        | NO (active)           | True                              | False    | Active   | -         |                         |
| 2162 | IP0002182     | P47755              | CAPZ2     | F-actin-capping protein subunit alpha-2                                                                         | 33               | 0.229                                                                 | 0        | NO (active)           | True                              | False    | Active   | -         |                         |
| 1110 | IP00470596    | Q14966              | ZNF638    | Islet 1 of Zinc finger protein 638                                                                              | 221              | 0.053                                                                 | 0        | NO (active)           | True                              | False    | Active   | -         |                         |
| 1536 | IP00212526    | Q9BXT5              | RBM12B    | Putative uncharacterized protein RBM12B                                                                         | 103              | 0.103                                                                 | 0        | NO (active)           | True                              | False    | Active   | -         |                         |
| 2163 | IP00987649    | Q9H919              | Q9H919    | 113 kDa protein                                                                                                 | 113              | 0.013                                                                 | 0        | NO (active)           | True                              | False    | Active   | -         |                         |
| 1892 | IP00018240    | Q9N4U7              | SDAD1     | Islet 1 of Protein SDAD1 homolog                                                                                | 80               | 0.068                                                                 | 0        | NO (active)           | True                              | False    | Active   | -         |                         |
| 1147 | IP00089860    | Q14676              | MDC1      | Islet 1 of Mediator of DNA damage checkpoint protein 1                                                          | 196              | 0.046                                                                 | 0        | NO (active)           | True                              | False    | Active   | -         |                         |
| 2168 | IP00212119    | Q17517              | TIP1      | Islet 1 of Tight junction protein ZO-1                                                                          | 71               | 0.061                                                                 | 0        | NO (active)           | True                              | False    | Active   | -         |                         |
| 2090 | IP00062599    | Q96645              | SMARCD1   | 71 kDa protein                                                                                                  | 71               | 0.061                                                                 | 0        | NO (active)           | True                              | False    | Active   | -         |                         |
|      |               |                     |           |                                                                                                                 |                  |                                                                       |          |                       |                                   |          |          |           |                         |



Supplementary Table 1 (cont.) | Hierarchical clustering analysis of proteins identified in active or inactive integrin adhesion complexes.

| #    | IPI Accession | UniProtKB Accession | Gene name | Protein name                                                                                         | Protein MW (kDa) | Relative abundance (mean normalized spectral count) $\times 10^3$ |                   | Fold enrichment (active/inactive) |                       | Specific enrichment <sup>1</sup> |                   | Cluster <sup>2</sup> | Adhesome <sup>3</sup> | Hierarchical clustering |
|------|---------------|---------------------|-----------|------------------------------------------------------------------------------------------------------|------------------|-------------------------------------------------------------------|-------------------|-----------------------------------|-----------------------|----------------------------------|-------------------|----------------------|-----------------------|-------------------------|
|      |               |                     |           |                                                                                                      |                  | Active integrin                                                   | Inactive integrin | Integrin <sup>4</sup>             | Integrin <sup>5</sup> | Active integrin                  | Inactive integrin |                      |                       |                         |
| 1646 | IP0029135     | Q14759              | LBR       | Lamin-B receptor                                                                                     | 71               | 0.057                                                             | 0                 | ND (active)                       | True                  | False                            | Active            | -                    | -                     |                         |
| 2021 | IP0004488     | Q16864              | ATP9F1F   | V-type proton ATPase subunit F                                                                       | 13               | 0.139                                                             | 0                 | ND (active)                       | False                 | False                            | Active            | -                    | -                     |                         |
| 1597 | IP0002613     | P49247              | RPIA      | Ribose-5-phosphate isomerase                                                                         | 33               | 0.282                                                             | 0                 | ND (active)                       | True                  | False                            | Active            | -                    | -                     |                         |
| 1311 | IP0022009     | Q85168              | NDUFB4    | NADH dehydrogenase [ubiquinone] 1 beta subcomplex subunit 4                                          | 15               | 0.413                                                             | 0                 | ND (active)                       | True                  | False                            | Active            | -                    | -                     |                         |
| 2054 | IP0018024     | Q9N966              | HMG20A    | Isoform 1 of High-mobility group protein 20A                                                         | 40               | 0.052                                                             | 0                 | ND (active)                       | False                 | False                            | Active            | -                    | -                     |                         |
| 2030 | IP0000617     | Q15355              | PPM1G     | Protein phosphatase 1G                                                                               | 59               | 0.073                                                             | 0                 | ND (active)                       | True                  | False                            | Active            | -                    | -                     |                         |
| 1648 | IP0000715     | Q60216              | RAD21     | Double-strand break repair protein rad21 homolog                                                     | 72               | 0.100                                                             | 0                 | ND (active)                       | True                  | False                            | Active            | -                    | -                     |                         |
| 1995 | IP0001023     | Q13065              | FHL1      | Protein flightless-1 homolog                                                                         | 145              | 0.029                                                             | 0                 | ND (active)                       | True                  | False                            | Active            | -                    | -                     |                         |
| 1958 | IP00171248    | O75530              | EED       | Isoform 3 of Polycomb protein EED                                                                    | 46               | 0.063                                                             | 0                 | ND (active)                       | True                  | False                            | Active            | -                    | -                     |                         |
| 1988 | IP00220961    | P05937              | CALB1     | Calbindin                                                                                            | 30               | 0.180                                                             | 0                 | ND (active)                       | True                  | False                            | Active            | -                    | -                     |                         |
| 2082 | IP00451731    | Q55182              | NDUFA7    | NADH dehydrogenase [ubiquinone] 1 alpha subcomplex subunit 7                                         | 13               | 0.310                                                             | 0                 | ND (active)                       | True                  | False                            | Active            | -                    | -                     |                         |
| 2174 | IP00003406    | Q16643              | DBN1      | Isoform 1 of Drebirin                                                                                | 71               | 0.028                                                             | 0                 | ND (active)                       | False                 | False                            | Active            | -                    | -                     |                         |
| 2055 | IP00456048    | Q80483              | COMM2D    | COMM domain-containing protein                                                                       | 23               | 0.125                                                             | 0                 | ND (active)                       | True                  | False                            | Active            | -                    | -                     |                         |
| 2098 | IP00416057    | Q53148              | RNMT      | Isoform 2 of RNA methylase N <sup>7</sup> methyltransferase                                          | 58               | 0.050                                                             | 0                 | ND (active)                       | False                 | False                            | Active            | -                    | -                     |                         |
| 2116 | IP00461676    | Q2V666              | PMF1      | HCG1999356, isoform CRA_c                                                                            | 20               | 0.090                                                             | 0                 | ND (active)                       | False                 | False                            | Active            | -                    | -                     |                         |
| 1620 | IP00799472    | Q9N257              | INCENP    | Isoform 2 of inner centromere protein                                                                | 105              | 0.051                                                             | 0                 | ND (active)                       | True                  | False                            | Active            | -                    | -                     |                         |
| 2112 | IP00221742    | Q8UP22              | PLC       | phosphoinositide 3-kinase                                                                            | 22               | 0.160                                                             | 0                 | ND (active)                       | True                  | False                            | Active            | -                    | -                     |                         |
| 1594 | IP00004859    | P54132              | BLM       | Bloom syndrome protein                                                                               | 159              | 0.029                                                             | 0                 | ND (active)                       | True                  | False                            | Active            | -                    | -                     |                         |
| 1939 | IP00208122    | O75475              | PSP1      | Isoform 1 of PCA and SFRS1-interacting protein                                                       | 60               | 0.042                                                             | 0                 | ND (active)                       | False                 | False                            | Active            | -                    | -                     |                         |
| 1986 | IP00216034    | Q9NNU2              | C20orf11  | Protein C20orf11                                                                                     | 27               | 0.187                                                             | 0                 | ND (active)                       | True                  | False                            | Active            | -                    | -                     |                         |
| 2036 | IP00100791    | Q13889              | GTF2I3    | General transcription factor III subunit 3                                                           | 38               | 0.051                                                             | 0                 | ND (active)                       | False                 | False                            | Active            | -                    | -                     |                         |
| 2067 | IP00305442    | Q9BSL1              | UBACL1    | Ubiquitin-associated domain-containing protein                                                       | 45               | 0.080                                                             | 0                 | ND (active)                       | True                  | False                            | Active            | -                    | -                     |                         |
| 2173 | IP00169000    | P62675              | MPP5C     | Isoform 1 of 28S ribosomal protein S5, mitochondrial                                                 | 48               | 0.073                                                             | 0                 | ND (active)                       | False                 | False                            | Active            | -                    | -                     |                         |
| 2154 | IP00396058    | Q80402              | NCAPG2    | Isoform 2 of Condensin-2 complex subunit C2                                                          | 132              | 0.022                                                             | 0                 | ND (active)                       | True                  | False                            | Active            | -                    | -                     |                         |
| 1881 | IP00154528    | Q96888              | SMC6      | Isoform 1 of Structural maintenance of chromosomes protein 6                                         | 126              | 0.026                                                             | 0                 | ND (active)                       | True                  | False                            | Active            | -                    | -                     |                         |
| 2050 | IP00026519    | P30405              | PFH       | Pepdyl-prolyl co-trans isomerase f, mitochondrial                                                    | 22               | 0.160                                                             | 0                 | ND (active)                       | False                 | False                            | Active            | -                    | -                     |                         |
| 1550 | IP00031168    | Q60256              | PP5A-P2   | Phosphoribosyl pyrophosphate synthase-associated protein 2                                           | 145              | 0.209                                                             | 0                 | ND (active)                       | True                  | False                            | Active            | -                    | -                     |                         |
| 1366 | IP00305289    | P52732              | KIF11     | Kinesin-like protein KIF11                                                                           | 119              | 0.087                                                             | 0                 | ND (active)                       | True                  | False                            | Active            | -                    | -                     |                         |
| 1529 | IP00202606    | Q75683              | SURF6     | Surfact locus protein 6                                                                              | 41               | 0.167                                                             | 0                 | ND (active)                       | True                  | False                            | Active            | -                    | -                     |                         |
| 1602 | IP00747053    | Q59427              | ERCC1     | Testis basal transcription factor complex helicase XPR3 subunit                                      | 41               | 0.253                                                             | 0                 | ND (active)                       | True                  | False                            | Active            | -                    | -                     |                         |
| 1273 | IP00218466    | P61619              | SEC61A1   | Protein transport protein SecE1 subunit alpha isoform 1                                              | 53               | 0.156                                                             | 0                 | ND (active)                       | True                  | False                            | Active            | -                    | -                     |                         |
| 1409 | IP00414836    | Q92882              | OSTP1     | Osteonectin-stimulating factor 1                                                                     | 24               | 0.360                                                             | 0                 | ND (active)                       | True                  | False                            | Active            | YES                  | -                     |                         |
| 2012 | IP00128900    | Q55111              | PCF2S     | Isoform 1 of Polycomb group RING finger protein 5                                                    | 50               | 0.106                                                             | 0                 | ND (active)                       | True                  | False                            | Active            | -                    | -                     |                         |
| 1863 | IP00303383    | Q12972              | PPP1R8    | Isoform Alpha of Nuclear inhibitor of protein phosphatase 1                                          | 38               | 0.106                                                             | 0                 | ND (active)                       | True                  | False                            | Active            | -                    | -                     |                         |
| 2085 | IP00302238    | Q9NY61              | AATF      | Protein AATF                                                                                         | 63               | 0.051                                                             | 0                 | ND (active)                       | True                  | False                            | Active            | -                    | -                     |                         |
| 2142 | IP00014622    | Q99259              | CNPE1     | Capsin-1                                                                                             | 45               | 0.037                                                             | 0                 | ND (active)                       | False                 | False                            | Active            | -                    | -                     |                         |
| 1407 | IP00005822    | Q9UJX2              | CDC23     | Isoform 1 of Cell division cycle protein 23 homolog                                                  | 69               | 0.142                                                             | 0                 | ND (active)                       | True                  | False                            | Active            | -                    | -                     |                         |
| 2106 | IP00025285    | O75348              | ATP9F1G1  | V-type proton ATPase subunit G 1                                                                     | 14               | 0.314                                                             | 0                 | ND (active)                       | True                  | False                            | Active            | -                    | -                     |                         |
| 1462 | IP00224594    | Q80161              | SNAP23    | Isoform Alpha-Delta of 26S proteasome non-ATPase regulatory subunit 4                                | 42               | 0.253                                                             | 0                 | ND (active)                       | True                  | False                            | Active            | -                    | -                     |                         |
| 2139 | IP00183603    | Q9NRP0              | OSTC      | Oligosaccharyltransferase complex subunit OSTC                                                       | 17               | 0.119                                                             | 0                 | ND (active)                       | False                 | False                            | Active            | -                    | -                     |                         |
| 1849 | IP00874020    | Q9H0M5              | PCBD2     | Pterin-4-alpha-carbonylamine dehydratase 2                                                           | 14               | 0.453                                                             | 0                 | ND (active)                       | True                  | False                            | Active            | -                    | -                     |                         |
| 1619 | IP00244020    | Q15311              | CNPE3     | Capsin-3                                                                                             | 60               | 0.121                                                             | 0                 | ND (active)                       | False                 | False                            | Active            | -                    | -                     |                         |
| 1932 | IP00016932    | Q15357              | INPPL1    | Isoform 1 of Phosphatidylinositol-3,4,5-trisphosphate 5-phosphatase 2                                | 139              | 0.022                                                             | 0                 | ND (active)                       | False                 | False                            | Active            | YES                  | -                     |                         |
| 2146 | IP00329528    | Q9Y486              | VRBP      | Isoform 1 of Protein VRBP                                                                            | 169              | 0.017                                                             | 0                 | ND (active)                       | True                  | False                            | Active            | -                    | -                     |                         |
| 2015 | IP00101428    | Q80161              | SNAP23    | Isoform SNAP-23a of Synaptosomal-associated protein 23                                               | 42               | 0.141                                                             | 0                 | ND (active)                       | True                  | False                            | Active            | -                    | -                     |                         |
| 1970 | IP00007142    | Q75817              | PDP2      | Ribonuclease P protein subunit p20                                                                   | 16               | 0.203                                                             | 0                 | ND (active)                       | True                  | False                            | Active            | -                    | -                     |                         |
| 2094 | IP00220202    | Q15007              | WTAP      | Isoform 1 of Pre-mRNA-splicing regulator WTAP                                                        | 44               | 0.074                                                             | 0                 | ND (active)                       | True                  | False                            | Active            | -                    | -                     |                         |
| 1504 | IP00202496    | Q75607              | NPM3      | Nucleoplasm-3                                                                                        | 19               | 0.133                                                             | 0                 | ND (active)                       | False                 | False                            | Active            | -                    | -                     |                         |
| 1847 | IP00171291    | Q9N942              | MPP1L7    | 39S ribosomal protein L17, mitochondrial                                                             | 47               | 0.227                                                             | 0                 | ND (active)                       | True                  | False                            | Active            | -                    | -                     |                         |
| 1447 | IP00550638    | Q9G2L1              | POLR1E    | Isoform 2 of DNA-directed RNA polymerase I subunit RPA49                                             | 47               | 0.138                                                             | 0                 | ND (active)                       | True                  | False                            | Active            | -                    | -                     |                         |
| 1424 | IP00121593    | Q9I496              | CLTA      | Isoform Non-bran of Clathrin light chain A                                                           | 24               | 0.534                                                             | 0                 | ND (active)                       | True                  | False                            | Active            | -                    | -                     |                         |
| 1311 | IP00033025    | Q15181              | SPY1      | S1 Hsp protein                                                                                       | 51               | 0.279                                                             | 0                 | ND (active)                       | True                  | False                            | Active            | -                    | -                     |                         |
| 1479 | IP00292168    | Q9Y234              | ASF1A     | Histone chaperone ASF1A                                                                              | 23               | 0.094                                                             | 0                 | ND (active)                       | False                 | False                            | Active            | -                    | -                     |                         |
| 1949 | IP00293396    | Q43747              | APFG1     | adaptor-related protein complex 1, gamma 1 subunit isoform A                                         | 92               | 0.060                                                             | 0                 | ND (active)                       | True                  | False                            | Active            | -                    | -                     |                         |
| 1313 | IP00170296    | Q90773              | SIRPB     | Paired amphipathic helix protein Sirpb                                                               | 145              | 0.081                                                             | 0                 | ND (active)                       | True                  | False                            | Active            | -                    | -                     |                         |
| 1670 | IP00373538    | P35251              | RFC1      | Isoform 1 of Replication factor C subunit 1                                                          | 128              | 0.034                                                             | 0                 | ND (active)                       | True                  | False                            | Active            | -                    | -                     |                         |
| 1516 | IP00299635    | Q9N909              | BIRC5     | baculoviral IAP repeat-containing 5                                                                  | 530              | 0.010                                                             | 0                 | ND (active)                       | True                  | False                            | Active            | -                    | -                     |                         |
| 2145 | IP00293126    | Q99426              | TBCB      | Tubulin-binding cofactor B                                                                           | 22               | 0.053                                                             | 0                 | ND (active)                       | False                 | False                            | Active            | -                    | -                     |                         |
| 2052 | IP00304409    | Q9Y2V2              | CARHSP1   | Calcium-regulated heat stable protein 1                                                              | 16               | 0.113                                                             | 0                 | ND (active)                       | False                 | False                            | Active            | -                    | -                     |                         |
| 1812 | IP00004497    | P11274              | BCKR      | Isoform 1 of Breakpoint cluster region protein                                                       | 143              | 0.022                                                             | 0                 | ND (active)                       | True                  | False                            | Active            | -                    | -                     |                         |
| 1621 | IP00126440    | Q13888              | GTF2H2    | General transcription factor IIH subunit 2                                                           | 44               | 0.180                                                             | 0                 | ND (active)                       | True                  | False                            | Active            | -                    | -                     |                         |
| 2007 | IP00217557    | Q8XK66              | NRM       | Isoform 1 of Nurin                                                                                   | 29               | 0.147                                                             | 0                 | ND (active)                       | True                  | False                            | Active            | -                    | -                     |                         |
| 2065 | IP00019495    | Q63172              | DYNLT1    | Dynein light chain Tctex-type 1                                                                      | 12               | 0.210                                                             | 0                 | ND (active)                       | False                 | False                            | Active            | -                    | -                     |                         |
| 2119 | IP00205721    | Q9N962              | COPS1     | COP9 signalosome complex subunit 3                                                                   | 45               | 0.030                                                             | 0                 | ND (active)                       | False                 | False                            | Active            | -                    | -                     |                         |
| 1505 | IP00000162    | Q8NEJ9              | NGDN      | Isoform 1 of Neurogranin                                                                             | 36               | 0.282                                                             | 0                 | ND (active)                       | True                  | False                            | Active            | -                    | -                     |                         |
| 1535 | IP00032206    | P50479              | PDLIM4    | Isoform 1 of PDZ and LIM domain protein 4                                                            | 35               | 0.177                                                             | 0                 | ND (active)                       | True                  | False                            | Active            | -                    | -                     |                         |
| 1763 | IP00178651    | Q9N942              | RNMT1     | Isoform 1 of RNA methylase N <sup>7</sup> , N <sup>2</sup> -dimethylguanosine tRNA methyltransferase | 69               | 0.107                                                             | 0                 | ND (active)                       | True                  | False                            | Active            | -                    | -                     |                         |
| 1412 | IP00440222    | Q6LA44              | MSH6      | Sperm protein                                                                                        | 37               | 0.080                                                             | 0                 | ND (active)                       | True                  | False                            | Active            | -                    | -                     |                         |
| 2023 | IP00026113    | P78316              | NOP14     | Isoform 1 of Nuclear protein 14                                                                      | 98               | 0.026                                                             | 0                 | ND (active)                       | False                 | False                            | Active            | -                    | -                     |                         |
| 1434 | IP00107113    | Q17544              | UTP45A    | Isoform 1 of U3 small nuclear RNA-associated protein 14 homolog A                                    | 96               | 0.098                                                             | 0                 | ND (active)                       | False                 | False                            | Active            | -                    | -                     |                         |
| 2128 | IP00024551    | Q9NPA0              | C15orf24  | UPF0480 protein C15orf24                                                                             | 26               | 0.055                                                             | 0                 | ND (active)                       | False                 | False                            | Active            | -                    | -                     |                         |
| 1807 | IP00297593    | Q70021              | USP34     | Isoform 1 of Ubiquitin carboxyl-terminal hydrolase 34                                                | 404              | 0.009                                                             | 0                 | ND (active)                       | True                  | False                            | Active            | -                    | -                     |                         |
| 1964 | IP00027139    | Q9N941              | CLIC5     | Isoform 2 of Chloride intracellular channel protein 5                                                | 47               | 0.098                                                             | 0                 | ND (active)                       | True                  | False                            | Active            | -                    | -                     |                         |
| 2108 | IP00003636    | Q94884              | ATXN10    | Ataxin-10                                                                                            | 53               | 0.038                                                             | 0                 | ND (active)                       | True                  | False                            | Active            | -                    | -                     |                         |
| 2133 | IP00099433    | Q8WY85              | MYST4     | Isoform 1 of Histone acetyltransferase MYST4                                                         | 231              | 0.008                                                             | 0                 | ND (active)                       | False                 | False                            | Active            | -                    | -                     |                         |
| 2013 | IP00202094    | P78560              | CRADD     | Death domain-containing protein CRADD                                                                | 23               | 0.094                                                             | 0                 | ND (active)                       | False                 | False                            | Active            | -                    | -                     |                         |
| 2059 | IP00303346    | Q9I498              | MPP1L7    | Isoform 2 of Mortality factor 4-like protein 1                                                       | 37               | 0.095                                                             | 0                 | ND (active)                       | True                  | False                            | Active            | -                    | -                     |                         |
| 1628 | IP000910781   | Q67644              | GPI       | Ribose-6-phosphate isomerase                                                                         | 64               | 0.106                                                             | 0                 | ND (active)                       | True                  | False                            | Active            | -                    | -                     |                         |
| 2058 | IP00294908    | Q14728              | PP2R5D    | Serine/threonine-protein phosphatase 2A 56 kDa regulatory subunit delta isoform                      | 69               | 0.037                                                             | 0                 | ND (active)                       | True                  | False                            | Active            | -                    | -                     |                         |
| 1569 | IP00100815    | Q8WTT2              | NDCB      | Nuclear complex protein 3 homolog                                                                    | 93               | 0.077                                                             | 0                 | ND (active)                       | True                  | False                            | Active            | -                    | -                     |                         |
| 1477 | IP00032459    | Q9Y272              | AP3M1     | AP-3 complex subunit mu-1                                                                            | 47               | 0.166                                                             | 0                 | ND (active)                       | True                  | False                            | Active            | -                    | -                     |                         |
| 2092 | IP00031479    | Q14554              | POU5F1    | Protein disulfide-isomerase A5                                                                       | 60               | 0.042                                                             | 0                 | ND (active)                       | True                  | False                            | Active            | -                    | -                     |                         |
| 1690 | IP00110898    | Q13144              | EIF2B5    | Translation initiation factor eIF-2B subunit epsilon                                                 | 80               | 0.052                                                             | 0                 | ND (active)                       | True                  | False                            | Active            | -                    | -                     |                         |
| 2093 | IP00102997    | Q86555              | WRNIP1    | Isoform 2 of ATPase WRNIP1                                                                           | 69               | 0.052                                                             | 0                 | ND (active)                       | True                  | False                            | Active            | -                    | -                     |                         |
| 2025 | IP002946134   | Q9P038              | FGF2      | Isoform 1 of Heparin-binding growth factor 2                                                         | 31               | 0.046                                                             | 0                 | ND (active)                       | False                 | False                            | Active            | -                    | -                     |                         |
| 2060 | IP00188113    | P63201              | COPS2     | Isoform 2 of COP9 signalosome complex subunit 2                                                      | 52               | 0.038                                                             | 0                 | ND (active)                       | False                 | False                            | Active            | -                    | -                     |                         |
| 2132 | IP00185859    | Q98812              | MRLP45    | 39S ribosomal protein L45, mitochondrial                                                             | 35               | 0.132                                                             | 0                 | ND (active)                       | True                  | False                            | Active            | -                    | -                     |                         |
| 198  | IP000911039   | P08107              | HSPAL1A   | Heat shock 70 kDa protein 1A, mitochondrial                                                          | 64               | 1.716                                                             | 0                 | ND (active)                       | True                  | False                            | Active            | -                    | -                     |                         |
| 2077 | IP00141290    | Q9P118              | MRLP14    | 39S ribosomal protein L14, mitochondrial                                                             | 16               | 0.261                                                             | 0                 | ND (active)                       | True                  | False                            | Active            | -                    | -                     |                         |
| 1850 | IP00007024    | Q9Y300              | FAM96B    | Protein FAM96B                                                                                       | 18               | 0.160                                                             | 0                 | ND (active)                       | False                 | False                            | Active            | -                    | -                     |                         |
| 2070 | IP00304885    | Q03188              | CENPC1    | Centromere protein C 1                                                                               | 107              | 0.024                                                             | 0                 | ND (active)                       | True                  | False                            | Active            | -                    | -                     |                         |
| 1484 | IP002059762   | Q9VW22              | LYPLAL1   | Isoform 1 of Lipophospholipase-like protein 1                                                        | 26               | 0.224                                                             | 0                 | ND (active)                       | True                  | False                            | Active            | -                    | -                     |                         |
| 1844 | IP00142044    | Q8YB88              | SUPV3L1   | ATP-dependent RNA helicase SUPV3L1, mitochondrial                                                    | 88               | 0.070                                                             | 0                 | ND (active)                       | True                  | False                            | Active            | -                    | -                     |                         |
| 1522 | IP00100160    | Q86P96              | CAND1     | Isoform 1 of Cullin-associated NEDD8-dissociated protein 1                                           | 136              | 0.067                                                             | 0                 | ND (active)                       | True                  | False                            | Active            | -                    | -                     |                         |
| 1460 | IP00101572    | P62309              | SNRPG     | Small nuclear ribonucleoprotein G                                                                    | 8                | 0.441                                                             | 0                 | ND (active)                       | False                 | False                            | Active            | -                    | -                     |                         |
| 1950 | IP00292221    | Q9HY92              | RFP1      | Ribosome production factor 1                                                                         | 40               | 0.108                                                             | 0                 | ND (active)                       | True                  | False                            | Active            | -                    | -                     |                         |
| 2033 | IP00023409    | Q9B277              | UPF3B     | Isoform 1 of Regulator of nonsense transcripts 3B                                                    | 58               | 0.075                                                             | 0                 | ND (active)                       | True                  | False                            | Active            | -                    | -                     |                         |
| 2065 | IP00101524    | Q8UB89              | TFP1L1    | Isoform 1 of Tufelin-interacting protein-11                                                          | 97               | 0.015                                                             | 0                 | ND (active)                       | False                 | False                            | Active            | -                    | -                     |                         |
| 2039 | IP00293476    |                     |           |                                                                                                      |                  |                                                                   |                   |                                   |                       |                                  |                   |                      |                       |                         |







Supplementary Table 2 (cont.) | Functional enrichment analysis of proteins differentially enriched in integrin adhesion complexes.

| Cluster <sup>1</sup> | Term <sup>2,3</sup>              | Proteins <sup>4</sup>                                                                                                                                                                                                                                                                                                                                                                                                                                                                                                                                                                                                                                                                                                                                                                                                                                                                                                                                                                                                                                                                                                                                                                                                                                                                                                                                                                                                                                                                                                                                                                                                                                                                                                                                                                                                                          | Count (proteins per term) | Fold enrichment | Corrected P value |
|----------------------|----------------------------------|------------------------------------------------------------------------------------------------------------------------------------------------------------------------------------------------------------------------------------------------------------------------------------------------------------------------------------------------------------------------------------------------------------------------------------------------------------------------------------------------------------------------------------------------------------------------------------------------------------------------------------------------------------------------------------------------------------------------------------------------------------------------------------------------------------------------------------------------------------------------------------------------------------------------------------------------------------------------------------------------------------------------------------------------------------------------------------------------------------------------------------------------------------------------------------------------------------------------------------------------------------------------------------------------------------------------------------------------------------------------------------------------------------------------------------------------------------------------------------------------------------------------------------------------------------------------------------------------------------------------------------------------------------------------------------------------------------------------------------------------------------------------------------------------------------------------------------------------|---------------------------|-----------------|-------------------|
| Inactive             | <b>GTP binding</b>               | EEF1A1, RAB8A, GNAI3, TUBB2A, RAB1A, CDC42, RAC2, GNB1, RAB35, ARF4, RHEB, RAB13, RAB27A                                                                                                                                                                                                                                                                                                                                                                                                                                                                                                                                                                                                                                                                                                                                                                                                                                                                                                                                                                                                                                                                                                                                                                                                                                                                                                                                                                                                                                                                                                                                                                                                                                                                                                                                                       | 13                        | 8.66            | 9.76E-06          |
| Inactive             | <b>P-loop</b>                    | ARL2, RAB8A, GNAI3, DTYMK, ARF5, ARF5, RAB1A, CDC42, ARF1, RAC2, RAB35, ARF4, RHEB, RAB13, NSF, RAB27A                                                                                                                                                                                                                                                                                                                                                                                                                                                                                                                                                                                                                                                                                                                                                                                                                                                                                                                                                                                                                                                                                                                                                                                                                                                                                                                                                                                                                                                                                                                                                                                                                                                                                                                                         | 16                        | 6.16            | 1.77E-05          |
| Inactive             | <b>Kinase</b>                    | COASY, PFKFB4, GNE, PKRAG1, FN3, DTYMK, DCK, PIP5K2, PIP5K1, TTN, PMVK, MST4, CMPK1, CBX, IK, PAPS1, CSK, SYK, DVL3, IRAK1, PFKL, PFKF, PFKM, OXSR1, STK4, CDK5, GAK, PRKX, TP53RK, PANK4, PMPK, RPS6KA3, RPS6KA1, MAPK14, PRK2, RMPK, MAPK9, PRK2                                                                                                                                                                                                                                                                                                                                                                                                                                                                                                                                                                                                                                                                                                                                                                                                                                                                                                                                                                                                                                                                                                                                                                                                                                                                                                                                                                                                                                                                                                                                                                                             | 38                        | 2.46            | 3.10E-04          |
| Inactive             | <b>Multifunctional enzyme</b>    | MTFHD1, PMPK, COASY, UMP5, PFKFB4, ATIC, GNE, TSTA3, PAPS1, RINGT, FDF1                                                                                                                                                                                                                                                                                                                                                                                                                                                                                                                                                                                                                                                                                                                                                                                                                                                                                                                                                                                                                                                                                                                                                                                                                                                                                                                                                                                                                                                                                                                                                                                                                                                                                                                                                                        | 11                        | 7.01            | 1.24E-03          |
| Inactive             | <b>Protein transport</b>         | NUP98, TSG1D1, VPS37B, ARF6, ARF5, RAB1A, FAMIL25A, SEC16A, SNF8, RAB23, VPS4A, RAB11A, SAR1B, SAR1A, NSF, EIFENF1, RAB8A, IPO8, C18ORF55, NUP1, ARF1, RAB35, ARF4, TOMM20, RAB14, RAB13, RAB10, XPO1, VPS25                                                                                                                                                                                                                                                                                                                                                                                                                                                                                                                                                                                                                                                                                                                                                                                                                                                                                                                                                                                                                                                                                                                                                                                                                                                                                                                                                                                                                                                                                                                                                                                                                                   | 29                        | 2.67            | 1.87E-03          |
| Inactive             | <b>Prenylated cysteine</b>       | CDK4, RAB8A, FRK2, RAB35, RAB13, RAB1A, RAB27A                                                                                                                                                                                                                                                                                                                                                                                                                                                                                                                                                                                                                                                                                                                                                                                                                                                                                                                                                                                                                                                                                                                                                                                                                                                                                                                                                                                                                                                                                                                                                                                                                                                                                                                                                                                                 | 7                         | 13.58           | 3.25E-03          |
| Inactive             | <b>Ligase</b>                    | ADCS, CPTS, RCTD1, AAR5, UBA6, SAEL1, AANS, ACS2, RN214, CNOT4, MKRN2, UBE2N, MTFHD1, UHRF1, ACS1, UBA1, UBA2, UBE2N, RN213, ACS4, AAC5                                                                                                                                                                                                                                                                                                                                                                                                                                                                                                                                                                                                                                                                                                                                                                                                                                                                                                                                                                                                                                                                                                                                                                                                                                                                                                                                                                                                                                                                                                                                                                                                                                                                                                        | 21                        | 3.07            | 7.05E-03          |
| Inactive             | <b>Phosphotransferase</b>        | PKFB4, PFKL, DTYMK, PFKF, DCK, PFKM, CDK5, PRKCB, RPS6KA3, RPS6KA1, MAPK14, MKL2, MAPK8, CSK, SYK                                                                                                                                                                                                                                                                                                                                                                                                                                                                                                                                                                                                                                                                                                                                                                                                                                                                                                                                                                                                                                                                                                                                                                                                                                                                                                                                                                                                                                                                                                                                                                                                                                                                                                                                              | 16                        | 3.55            | 1.79E-02          |
| Inactive             | <b>Palmpolantar keratoderma</b>  | KRT9, JUP, KRT6B, DSG1, KRT14, DSP                                                                                                                                                                                                                                                                                                                                                                                                                                                                                                                                                                                                                                                                                                                                                                                                                                                                                                                                                                                                                                                                                                                                                                                                                                                                                                                                                                                                                                                                                                                                                                                                                                                                                                                                                                                                             | 6                         | 14.09           | 1.80E-02          |
| Inactive             | <b>Monomer</b>                   | RPS6KA3, CBR1, RPS6KA1, PKM2, ARF4, FOXR, RHEB                                                                                                                                                                                                                                                                                                                                                                                                                                                                                                                                                                                                                                                                                                                                                                                                                                                                                                                                                                                                                                                                                                                                                                                                                                                                                                                                                                                                                                                                                                                                                                                                                                                                                                                                                                                                 | 7                         | 10.08           | 2.02E-02          |
| Inactive             | <b>Magnesium</b>                 | ADCS, TTN, MSTA, ITGAM, FDF1, ACS4, RHOD, SAR1B, ACS4, NSF, IRAK1, PFKL, PFKF, PDKP, PFKM, OXSR1, STK4, LAR3, RPS6KA3, ITFA, RPS6KA1, PKM2, RHEB, PRP2, SRXN1                                                                                                                                                                                                                                                                                                                                                                                                                                                                                                                                                                                                                                                                                                                                                                                                                                                                                                                                                                                                                                                                                                                                                                                                                                                                                                                                                                                                                                                                                                                                                                                                                                                                                  | 25                        | 2.52            | 2.31E-02          |
| Inactive             | <b>mRNA processing</b>           | RBM12, RBM4, SFI, PRPF39, CASC3, RINGT, HNRNPA3, RBM4B, HNRNPH3, SRB2, TARDBP, KHSRP, CFSF7, QKI, RBM38, SIFI, RBM14, RBM25, SSU72                                                                                                                                                                                                                                                                                                                                                                                                                                                                                                                                                                                                                                                                                                                                                                                                                                                                                                                                                                                                                                                                                                                                                                                                                                                                                                                                                                                                                                                                                                                                                                                                                                                                                                             | 18                        | 3.09            | 3.02E-02          |
| Inactive             | <b>Heterodimer</b>               | CAPN1, S100A8, TUBB2A, ITGAS, ITGAV, TUBA4A, CAPN2, TGB1, TUBA1B, ITGAM, CAPN1                                                                                                                                                                                                                                                                                                                                                                                                                                                                                                                                                                                                                                                                                                                                                                                                                                                                                                                                                                                                                                                                                                                                                                                                                                                                                                                                                                                                                                                                                                                                                                                                                                                                                                                                                                 | 11                        | 4.77            | 3.11E-02          |
| Unenriched           | <b>Acetylation</b>               | KRCX5, LDH8, LDHA, POLM5, WDR82, BTK, NONO, RBM8A, RPLP0, UZAF1, RPL11, RPL12, EIF2B3, RAN, PTBP1, JUP, MAPK1, SPAG9, NME2, KRT19, RPS18, PPI1CA, RPS19, RPS18, RPS16, RPS17, RFC2, RPS11, MCT51, NEK7, ALDOA, HSD17B10, FPL11, CHCHD3, DUSP12, TAGLN2, ACP1, ACAT1, HNRNPA3, C10RF57, IDH2, RPS20, PRPF40A, HNRNPA3, RPSA, SRP54, LGALS1, PHB, GARS, DDX1, EPRS, HBA1, DDX5, RPS5, HNRNPA1, HNRNPA2B1, VDAC1, WDR61, LASP1, NIPSNAP1, NUF12, GNB2L1, RAB5C, TSNAX, TCOF1, C22ORF28, DGC14, YBK1, LSM14A, ACTR2, CDPB2, RHP18, GNAS, ATP5O, RBM42, SLC25A5, UFL1L, PFK3C2A, CCTA, DECF1, CLIC1, HNR9B1, GNB2, ROCI1, CLIC4, EEF1G, FARSA, THOC3, POLR2B, LINC5, NCB1, LINC11, NUPR2, POLR2A, NUP214, DDX19A, PCMT1, MARS, MAT2A, CNAO2B, MAGCD01, SGT4, EEF1E1, PSMC10, PHGDH, YWHAQ, HSPA4L, USP48, DNM2, MMS19, RALY, NCBP1, ZC3H4V1, IQGAP2, MTFHD1, CBRF, AIP, PPP4C, DARS, HNRNPA2B1, CORO7, PPP1CB, PSMA2, ADRM1, PSMA1, PSMA4, HSPB1, EDF1, PDCD6IP, RNM20, XRN2, RPS1, CHMP2A, CNBP, SRM, KARS, TTC4, SPZC5, PSMB6, PSMB1, ARPC3, DDX3X, ZNF326, HNRNPF, PSMB2, DNAA1, HNRNPO, EFB1, HIST2H3A, WDOR, SAPI8, SMG1, AK2, CSDR3F3, PSMD6, PPIH, HDAC1, PPIA, POLD1, E1FH, SEC13, HSPD1, DNAA1B, HNRNPH1, EFB2, HSP90A1, METAP1, PRDX5, PRDX2, CAD, BUD31, RPS1, ACTR1A, MAGOHB, HSPD92, HNR9B1, HSP90A1, HSCAM, SMOX1, GIBB1, NUPR2, CDK4, MCM3, CDK4, MCM6, SARNP, EFAF4, EFAF2, UCHL5, HMB1, HBG2, UBE2Z, GSTP1, SEC23B, KRT6C, VPS29, KRT6A, VIM, HAT1, VARS, ANKX7, RPA2, RPA2, KRT8, NUDT21, HSPA4, CNI2, UCK2, YES1, GADPH, NSUN2, GTF3C4, GICF3, PSTRIP2, NSD2, ATXN2, HSP90B1, KRT77, PHB2, ANXA11, LSM12, HNB1, RNF40                                                                                                                                                                                                            | 260                       | 1.80            | 8.50E-31          |
| Unenriched           | <b>Phosphoprotein</b>            | KRCX5, LDH8, LDHA, HNR8, SEC13A, POLM5, STATA3, KRPR, WDR82, BTK, NONO, WDR74, DDX17, RBM8A, RPLP0, SFRS9, UZAF1, PQB91, RPL11, RPL12, NUP35, CDC45, CCAR1, RAN, RCOF1, PTBP1, AIP, MAPK1, SPAG9, KRT19, NME2, PPI1CA, RPS18, KRT17, RPS17, RPS14, CNBP, RPS10, POLD1, MCT51, NEK7, FUS, GUC1, ALDOA, FPL11, CHCHD3, F1G2, IGF2BP1, RCL1, TAGLN2, ACP1, HNRNPA3, RAC1, RPS20, PRPF40A, HNRNPA3, RPSA, PHB, LGALS1, DDX1, GARS, EPRS, NDC80, HBA1, DDX5, HNRNPA1, RPS5, HNRNPA2, VDAC1, SYNE1, RPL18A, NUP62, LASP1, GNB2L1, TCOF1, TSNAX, POA6, C22ORF28, DGC14, YBK1, LSM14A, ANKRD17, CORP2, RRP18, USP10, CTBP1, NDUFB10, UFD01, SLC25A5, PIK3C2A, CTF6, APOC1, CLIC1, GTF2B, HNRPO, GNB2, FANCD2, CDK11A, EEF1G, FARSA, SRCAP, RBM33, NOB1, NUPR2, RPL22, POLR2A, SIRT, NUP214, PRR21A, TRIP11, ACTL3, EFB1, HSPB1, CMIP, RPS10, MVK, FELO, PDCD6IP, MCT51, NEK7, ACTB2, CNBP, MAGEA1, IGF2BP1, RCL1, ACP1, LINC28B, DNAA2, MMS19, RALY, NCBP1, ZC3H4V1, RBM3, E1FH, GARS, MAT2A, CSNK2B, ELAV1, STAT1, SGT4, TRIM21, CAPRN1, NRAS, CENB2, TRFC, RPL23, PHGDH, YWHAQ, HSPA4L, USP48, TRMT112, PDCD6IP, RNM20, DCUN1D5, XRN2, CPM2A, AFG1, LINC28B, KARS, TSC4, PSMA4, PSMB7, DDX3X, ARPC3, PSMB1, ZNF326, HNRNPF, NUBM, PRKRA, HNRNPO, DNAA1, E1FH, DNAA2, HIST2H3A, CSTF3, WDOR, SMOX1, GIBB1, PSMC6, NOSIP, HDAC1, PPIA, POLD1, E1FH, SEC13, HSPD1, HNRNPH1, HSP90A1, METAP1, CAD, RPS1, PRMT1, PCBP1, PCBP2, MAGOHB, CAT, TUBA1A, CLINT1, IMPDH2, PSM59, KHDH81, HSP90A1, SSBP1, NUP98, HMB1, G3BP1, CDK6, MCM3, CDK4, MCM6, SARNP, EFAF1, ATROV1A, EFAF2, CFSF4, CFSF4, HBG2, CFSF2, GTF1, KRT6C, KRT6A, VIM, HAT1, CTNND1, COMT, VARS, STUB1, RNF126, TYMS, RPA2, PSMB3, KRT5, KRT6, NUDT21, KRT1, LARS, HSPA4, CNI2, UCK2, YES1, GADPH, NSUN2, GTF3C4, GICF3, PSTRIP2, NSD2, ATXN2, HSP90B1, KRT77, PHB2, ANXA11, LSM12, HNB1, RNF40 | 66                        | 6.14            | 8.54E-30          |
| Unenriched           | <b>RNA-binding</b>               | RALY, EFB2C, ZC3H4V1, RBM3, TIMM50, RBM7, YBK1, RPS3, NONO, ANKRD17, DDX17, RBM8A, RPLP0, PCBP2, SFRS9, UZAF1, MAGOHB, RPL11, RPL12, KHDH81, RBM42, PTBP1, G3BP1, HNRNPA2B1, EXOSC1, SARNP, HNRPO, EFAF1, RPS18, ROCI1, THOC3, CFSF4, RPS11, CFSF4, THOC3, CFSF2, SNRPE, FUS, FPL11, RBM33, IGF2BP1, LINC28B, NUPR2, HNRNPA3, DDX3, DDX19A, HNRNPF, NUDT21, PRKRA, HNRNPO, NSUN2, HNRNPA3, MARS, SRP54, DDX1, EPRS, ELAVL1, DDX5, HNRNPA1, TRIM21, HNRNPA2B1, HNRNPA2, RPL22, E1FH, CIRBP, HNRNPH1, EFAF2                                                                                                                                                                                                                                                                                                                                                                                                                                                                                                                                                                                                                                                                                                                                                                                                                                                                                                                                                                                                                                                                                                                                                                                                                                                                                                                                      | 66                        | 6.14            | 8.54E-30          |
| Unenriched           | <b>Cytoplasm</b>                 | NCBP1, LDH8, EFB2C, LDHA, SEC13A, ZC3H4V1, RBM3, STATA3, KRPR, BTK, AIP, RAE1, RBM8A, RPLP0, TUBG1, PPP4C, CCAR1, NUDT4, DARS, RAN, BAIAP2, HNRNPA2B1, CORO7, LYPLA1, PPP1CB, PSMA2, JUP, SPAG9, ADRM1, PSMA1, NME2, PPI1CA, RPS18, KRT17, PSM44, TELO2, EDF1, HSPB1, CMIP, RPS10, MVK, FELO, PDCD6IP, MCT51, NEK7, ACTB2, CNBP, MAGEA1, IGF2BP1, RCL1, ACP1, LINC28B, KARS, PSMB3, PFI1, PSMA4, PSMB7, PSMB6, DDX3X, ARPC3, PSMB1, PSMB2, PRKRA, HNRNPO, EFB1, HNRNPA3, RPSA, SRP54, SAPI8, SMG1, HNRNPA2, NOSIP, PSMA5, PPIH, SYNE1, NUP62, PPIA, LASP1, E1FH4, PPII, CIRBP, NUF12, DNAA1B, HSP90A1, HSP90B1, TSNAX, PRDX5, PRDX2, CAD, YBK1, RPS3, LSM14A, ACTR2, CORP2, ANKRD17, ACTR1A, PCBP1, PCBP2, CLINT1, AKR1C1, CTBP1, RBM42, HSP90A1, PIK3C2A, UFD01, HMB5, G3BP1, CLIC2, CCTA, CLIC1, HNRPO, GNB2, CDK11A, FARSA, VPS29, NKT1, LANCL1, CTNND1, HAT1, COMT, STUB1, NUPR2, MUF2, SIRT, DDX19A, PPI2C8, KRT8, LARS, PCMT1, HSPA4, GSTO1, YES1, GADPH, NSUN2, TRIP11, MARS, PSTRIP2, ELAV1, STAT1, CAPRN1, TRIM21, UBE1, ATXN2, PHB2, EEF1E1, ANXA11, YWHAQ, HSPA4L, USP48, DUSP9, DNAA2, RPS10, RPS11, FARSA, EFAF2                                                                                                                                                                                                                                                                                                                                                                                                                                                                                                                                                                                                                                                                                                                  | 153                       | 2.31            | 2.37E-23          |
| Unenriched           | <b>Protein biosynthesis</b>      | VARS, KARS, RPS29, RPLP0, LARS, RPL11, EFB1, RPL12, RPS20, EFB2B, MARS, RPSA, DARS, GARS, EPRS, RPS5, EFAF2, IGF2C2, RPS19, RPL23, RPS16, RPL18A, RPL22, RPS17, RPS14, E1FH, EEF1E1, EEF1G, RPS10, RPS11, FARSA, EFAF2                                                                                                                                                                                                                                                                                                                                                                                                                                                                                                                                                                                                                                                                                                                                                                                                                                                                                                                                                                                                                                                                                                                                                                                                                                                                                                                                                                                                                                                                                                                                                                                                                         | 33                        | 8.82            | 2.61E-18          |
| Unenriched           | <b>Nucleus</b>                   | MMS19, RALY, KRCX5, NCBP1, EFB2C, ZC3H4V1, RBM3, STATA3, WDR82, MED20, CBRF, BTK, WDR74, NONO, DDX17, RAE1, CGGBP1, RBM8A, SFRS9, UZAF1, PQB91, NUP37, NUP35, PPP4C, CDC45, RAN, RCOF1, HNRNPA2B1, PTBP1, PPP1CB, RHC5, PSMA2, ADRM1, PSMA1, NME2, PPI1CA, RPS18, KRT17, PSM44, TELO2, EDF1, HSPB1, CMIP, RPS10, MVK, FELO, PDCD6IP, MCT51, NEK7, ACTB2, CNBP, MAGEA1, IGF2BP1, RCL1, ACP1, LINC28B, RPS19, RPL23, RPL18A, RPS16, RPL22, RPS17, RPS14, RPS10, RPS11, HNRNPH1, SNRPE                                                                                                                                                                                                                                                                                                                                                                                                                                                                                                                                                                                                                                                                                                                                                                                                                                                                                                                                                                                                                                                                                                                                                                                                                                                                                                                                                            | 159                       | 1.86            | 5.81E-15          |
| Unenriched           | <b>Ribonucleoprotein</b>         | VIM, KARS, PSMB5, PSMA4, ANKRD17, PSMB7, PSMB6, DDX3X, PSMB1, RPLP0, KRT8, PSMB2, CTBP1, SLC25A5, RAN, RCOF1, STAT1, GTF2B, HNRNPA1, SGT4, VDAC1, EFAF4, MAPK1, KRT19, KRT18, HDAC1, TRC, PPIA, PSMA4, E1FH, CFSF4, HSPD1, PDCD6IP, SRCAP                                                                                                                                                                                                                                                                                                                                                                                                                                                                                                                                                                                                                                                                                                                                                                                                                                                                                                                                                                                                                                                                                                                                                                                                                                                                                                                                                                                                                                                                                                                                                                                                      | 34                        | 5.99            | 8.15E-14          |
| Unenriched           | <b>Host-virus interaction</b>    | RALY, NCBP1, FPL11, PPI1, DGC14, YBK1, NONO, HNRNPA3, RBM8A, HNRNPF, SFRS9, NUDT21, UZAF1, MAGOHB, PPII, PRPF40A, CTF3, PTBP1, HNRNPA2B1, DDX5, HNRNPA1, PPIH, THOC6, CFSF4, CFSF4, HNRNPH1, CFSF2, SNRPE, THOC3, XRN2                                                                                                                                                                                                                                                                                                                                                                                                                                                                                                                                                                                                                                                                                                                                                                                                                                                                                                                                                                                                                                                                                                                                                                                                                                                                                                                                                                                                                                                                                                                                                                                                                         | 30                        | 5.79            | 2.09E-11          |
| Unenriched           | <b>Proteasome</b>                | PSMB5, PSMA2, PSMB4, PSMA1, ADRM1, PSMB1, PSMB6, PSMB7, PSMB4, PSMA1, PSMA10, PSMB2, UCHL5, PSMB5, PSM59                                                                                                                                                                                                                                                                                                                                                                                                                                                                                                                                                                                                                                                                                                                                                                                                                                                                                                                                                                                                                                                                                                                                                                                                                                                                                                                                                                                                                                                                                                                                                                                                                                                                                                                                       | 16                        | 14.35           | 6.38E-11          |
| Unenriched           | <b>Ribosome</b>                  | RPSA, RPS5, RPS18, RPS19, RPL18A, RPL23, RPS16, RPS17, RPL22, RPS14, RPLP0, RPS10, RPL11, RPS11, RPS11, RPS12, RPL2                                                                                                                                                                                                                                                                                                                                                                                                                                                                                                                                                                                                                                                                                                                                                                                                                                                                                                                                                                                                                                                                                                                                                                                                                                                                                                                                                                                                                                                                                                                                                                                                                                                                                                                            | 17                        | 11.70           | 2.96E-10          |
| Unenriched           | <b>mRNA splicing</b>             | RALY, NCBP1, PPI1, PTBP1, HNRNPA2B1, DDX5, DGC14, HNRNPA1, HKT1, NONO, HNRNPA3, PPIH, RBM8A, HNRNPF, SFRS9, THOC6, UZAF1, MAGOHB, PPII3, HNRNPH1, THOC3, SNRPE, PRPF40A                                                                                                                                                                                                                                                                                                                                                                                                                                                                                                                                                                                                                                                                                                                                                                                                                                                                                                                                                                                                                                                                                                                                                                                                                                                                                                                                                                                                                                                                                                                                                                                                                                                                        | 23                        | 5.53            | 7.62E-08          |
| Unenriched           | <b>mRNA transport</b>            | NCBP1, ADFC1, NUP98, HNRNPA1, NUP214, NUP62, RBM8A, DDX19A, THOC6, MAGOHB, NUP37, NUP54, NUP55, THOC3                                                                                                                                                                                                                                                                                                                                                                                                                                                                                                                                                                                                                                                                                                                                                                                                                                                                                                                                                                                                                                                                                                                                                                                                                                                                                                                                                                                                                                                                                                                                                                                                                                                                                                                                          | 14                        | 9.50            | 7.84E-07          |
| Unenriched           | <b>Threonine protease</b>        | PSMA2, PSMB5, PSMA4, PSMA1, PSMB7, PSMB6, PSMB1, PSMA4, PSMB2                                                                                                                                                                                                                                                                                                                                                                                                                                                                                                                                                                                                                                                                                                                                                                                                                                                                                                                                                                                                                                                                                                                                                                                                                                                                                                                                                                                                                                                                                                                                                                                                                                                                                                                                                                                  | 9                         | 22.60           | 8.44E-07          |
| Unenriched           | <b>Methylation</b>               | KHDH81, FUS, HIST2H3A, SLC25A5, RBM3, HNRNPA2B1, G3BP1, ELAVL1, DDX5, HNRNPA1, HNRNPA2, HNRPO, NIAS, PPP2CB, RAC1, HNRNPO, KRT1, HNRNPH1, PPP4C, GADPH, HNRNPA3                                                                                                                                                                                                                                                                                                                                                                                                                                                                                                                                                                                                                                                                                                                                                                                                                                                                                                                                                                                                                                                                                                                                                                                                                                                                                                                                                                                                                                                                                                                                                                                                                                                                                | 22                        | 4.57            | 6.45E-06          |
| Unenriched           | <b>Ribosomal protein</b>         | RPSA, RPS27L, RPS5, RPS18, RPS19, MRPL12, RPS16, RPL18A, RPL23, RPS17, RPL12, RPS14, RPLP0, RPS10, RPL11, RPS11, RPS11, RPS12, RPL2                                                                                                                                                                                                                                                                                                                                                                                                                                                                                                                                                                                                                                                                                                                                                                                                                                                                                                                                                                                                                                                                                                                                                                                                                                                                                                                                                                                                                                                                                                                                                                                                                                                                                                            | 19                        | 5.08            | 1.52E-05          |
| Unenriched           | <b>ATP-binding</b>               | KRCX5, HSP90A1, CAD, MTFHD1, BTK, ACTR2, DDX17, ACTR1A, HSP90A1, DARS, PIK3C2A, G3BP1, CDK6, CCTA, MCM3, CDK4, MCM4, MCM5, MCM6, RFS, MAPK1, ATROV1A, NME2, RFC2, CDK11A, MVK, FARSA, UBE2Z, SNRP, NEK7, PRPS1, ACTB1, UBE2D3, C10RF57, DDX3X, DDX19A, LARS, HSPA4, UCK2, YES1, ACSL3, MARS, MAT2A, MSH2, DDX1, GARS, SMG1, AK2, EPRS, DDX5, HSP90B1, PSMC6, HSPA4L, HSPD1                                                                                                                                                                                                                                                                                                                                                                                                                                                                                                                                                                                                                                                                                                                                                                                                                                                                                                                                                                                                                                                                                                                                                                                                                                                                                                                                                                                                                                                                     | 57                        | 2.16            | 2.43E-05          |
| Unenriched           | <b>Nucleotide-binding</b>        | VARS, KARS, RPS29, RPLP0, LARS, RPL11, EFB1, RPL12, RPS20, EFB2B, MARS, RPSA, DARS, GARS, EPRS, RPS5, EFAF2, IGF2C2, RPS19, RPL23, RPS16, RPL18A, RPL22, RPS17, RPS14, E1FH, EEF1E1, EEF1G, MSH2, DDX1, GARS, EPRS, SMG1, AK2, DDX5, NRAS, HSP90B1, PSMB2, HSPA4L, HSPD1, DNAA2                                                                                                                                                                                                                                                                                                                                                                                                                                                                                                                                                                                                                                                                                                                                                                                                                                                                                                                                                                                                                                                                                                                                                                                                                                                                                                                                                                                                                                                                                                                                                                | 66                        | 1.97            | 5.52E-05          |
| Unenriched           | <b>Oxygen carrier</b>            | PSMA2, PSMB5, PSMA4, PSMB6, PSMB1, PSMA4, PSMB2                                                                                                                                                                                                                                                                                                                                                                                                                                                                                                                                                                                                                                                                                                                                                                                                                                                                                                                                                                                                                                                                                                                                                                                                                                                                                                                                                                                                                                                                                                                                                                                                                                                                                                                                                                                                | 6                         | 37.67           | 5.89E-05          |
| Unenriched           | <b>Proteinase</b>                | PSMA2, PSMB5, PSMA4, PSMB6, PSMB1, PSMA4, PSMB2                                                                                                                                                                                                                                                                                                                                                                                                                                                                                                                                                                                                                                                                                                                                                                                                                                                                                                                                                                                                                                                                                                                                                                                                                                                                                                                                                                                                                                                                                                                                                                                                                                                                                                                                                                                                | 7                         | 20.68           | 2.23E-04          |
| Unenriched           | <b>Spliceosome</b>               | RALY, PPI1, HNRNPA2B1, DDX5, HNRNPA1, DGC14, HNRNPA3, PPIH, RBM8A, HNRNPF, SFRS9, THOC6, UZAF1, MAGOHB, PPII3, HNRNPH1, THOC3, SNRPE, PRPF40A                                                                                                                                                                                                                                                                                                                                                                                                                                                                                                                                                                                                                                                                                                                                                                                                                                                                                                                                                                                                                                                                                                                                                                                                                                                                                                                                                                                                                                                                                                                                                                                                                                                                                                  | 14                        | 5.86            | 2.88E-04          |
| Unenriched           | <b>Blood</b>                     | HBB, HBD1, HBG1, HBG2, HBA1, HBE1                                                                                                                                                                                                                                                                                                                                                                                                                                                                                                                                                                                                                                                                                                                                                                                                                                                                                                                                                                                                                                                                                                                                                                                                                                                                                                                                                                                                                                                                                                                                                                                                                                                                                                                                                                                                              | 6                         | 27.39           | 4.62E-04          |
| Unenriched           | <b>Oxygen transport</b>          | HBB, HBD1, HBG1, HBG2, HBA1, HBE1                                                                                                                                                                                                                                                                                                                                                                                                                                                                                                                                                                                                                                                                                                                                                                                                                                                                                                                                                                                                                                                                                                                                                                                                                                                                                                                                                                                                                                                                                                                                                                                                                                                                                                                                                                                                              | 6                         | 25.11           | 7.80E-04          |
| Unenriched           | <b>Intermediate filament</b>     | KRT6C, KRT6A, KRT19, KRT18, KRT77, KRT17, KRT5, KRT16, KRT8, VIM, KRT1                                                                                                                                                                                                                                                                                                                                                                                                                                                                                                                                                                                                                                                                                                                                                                                                                                                                                                                                                                                                                                                                                                                                                                                                                                                                                                                                                                                                                                                                                                                                                                                                                                                                                                                                                                         | 11                        | 7.08            | 1.18E-03          |
| Unenriched           | <b>Stress response</b>           | HSP90A1, HSP90A1, RBM3, HSPA4L, HSPB1, CIRBP, HSPA4, DNAA1B, HSPD1, SERPINH1                                                                                                                                                                                                                                                                                                                                                                                                                                                                                                                                                                                                                                                                                                                                                                                                                                                                                                                                                                                                                                                                                                                                                                                                                                                                                                                                                                                                                                                                                                                                                                                                                                                                                                                                                                   | 10                        | 7.61            | 2.19E-03          |
| Unenriched           | <b>Aminoacyl-tRNA synthetase</b> | DARS, LARS, GARS, EPRS, FARSA, VARS, KARS, MARS                                                                                                                                                                                                                                                                                                                                                                                                                                                                                                                                                                                                                                                                                                                                                                                                                                                                                                                                                                                                                                                                                                                                                                                                                                                                                                                                                                                                                                                                                                                                                                                                                                                                                                                                                                                                | 8                         | 10.30           | 3.76E-03          |
| Unenriched           | <b>Erythrocyte</b>               | HBB, HBD1, HBG1, HBG2, HBA1, HBE1                                                                                                                                                                                                                                                                                                                                                                                                                                                                                                                                                                                                                                                                                                                                                                                                                                                                                                                                                                                                                                                                                                                                                                                                                                                                                                                                                                                                                                                                                                                                                                                                                                                                                                                                                                                                              | 6                         | 15.07           | 1.33E-02          |
| Unenriched           | <b>Metalloprotein</b>            | PP1CA, MAT2A, HBB, PPP2CB, HBD1, HBG1, HBG2, HBA1, CAT, HBE1, PPP4C, PPP1CB                                                                                                                                                                                                                                                                                                                                                                                                                                                                                                                                                                                                                                                                                                                                                                                                                                                                                                                                                                                                                                                                                                                                                                                                                                                                                                                                                                                                                                                                                                                                                                                                                                                                                                                                                                    | 12                        | 4.86            | 1.36E-02          |
| Unenriched           | <b>WD repeat</b>                 | SEC13A, GNB1, WDOR, CORO7, WDR82, WDR74, CORP2, DCAF7, GNB2, WDR61, RAE1, THOC6, SEC13, EFB1, NUP37, GNB2L1, THOC3                                                                                                                                                                                                                                                                                                                                                                                                                                                                                                                                                                                                                                                                                                                                                                                                                                                                                                                                                                                                                                                                                                                                                                                                                                                                                                                                                                                                                                                                                                                                                                                                                                                                                                                             | 18                        | 3.28            | 1.47E-02          |
| Unenriched           | <b>Translation</b>               | LSM14A, SARNP, EFAF1, NCBP1, EFAF2, EFB2C, RBM8A, IGF2BP1, EFAF2                                                                                                                                                                                                                                                                                                                                                                                                                                                                                                                                                                                                                                                                                                                                                                                                                                                                                                                                                                                                                                                                                                                                                                                                                                                                                                                                                                                                                                                                                                                                                                                                                                                                                                                                                                               | 9                         | 6.75            | 1.92E-02          |
| Unenriched           | <b>Cell cycle</b>                | KHDH81, RAN, CDK6, NDC80, CDK4, MCM3, RCL1, PPP1CB, MCM6, MAPK1, SPZC5, PPI1CA, CNB2, KRT18, FANCD2, CDK11A, ANXA11, PLO1, NUP37, PDCD6IP, CDC45, UBE2Z, MCT51, CCAR1                                                                                                                                                                                                                                                                                                                                                                                                                                                                                                                                                                                                                                                                                                                                                                                                                                                                                                                                                                                                                                                                                                                                                                                                                                                                                                                                                                                                                                                                                                                                                                                                                                                                          | 24                        | 2.61            | 1.95E-02          |
| Unenriched           | <b>Heterotetramer</b>            | KRT5, HBB, KRT1, CSNK2B, HBD1, HBG1, HBG2, HBA1, HBE1                                                                                                                                                                                                                                                                                                                                                                                                                                                                                                                                                                                                                                                                                                                                                                                                                                                                                                                                                                                                                                                                                                                                                                                                                                                                                                                                                                                                                                                                                                                                                                                                                                                                                                                                                                                          | 9                         | 6.55            | 2.37E-02          |
| Unenriched           | <b>Cell division</b>             | RAN, CDK6, NDC80, RCL1, CDK4, PPP1CB, MCM5, SPZC5, PPI1CA, CNB2, CDK11A, ANXA11, PLO1, NUP37, PDCD6IP, CDC45, UBE2Z                                                                                                                                                                                                                                                                                                                                                                                                                                                                                                                                                                                                                                                                                                                                                                                                                                                                                                                                                                                                                                                                                                                                                                                                                                                                                                                                                                                                                                                                                                                                                                                                                                                                                                                            | 17                        | 3.23            | 2.97E-02          |
| Unenriched           | <b>Nuclear pore complex</b>      | NUP214, NUP62, NUP98, DDX19A, NUP37, NUP54, NUP35                                                                                                                                                                                                                                                                                                                                                                                                                                                                                                                                                                                                                                                                                                                                                                                                                                                                                                                                                                                                                                                                                                                                                                                                                                                                                                                                                                                                                                                                                                                                                                                                                                                                                                                                                                                              | 7                         | 8.79            | 4.59E-02          |

<sup>1</sup>Proteins identified by MS and assigned to active, inactive or unenriched clusters (Supplementary Table 1) were subjected to analysis of enrichment of SwissProt Protein Information Resource keywords.

<sup>2</sup>Terms with fold enrichment  $\geq 1.5$ , Bonferroni-corrected P value  $< 0.05$ , EASE score (modified Fisher's exact probability)  $< 0.05$  and at least two proteins per term were considered significantly overrepresented.

<sup>3</sup>Terms highlighted in the text are indicated in bold font. Data associated with terms significantly overrepresented in all three clusters are indicated in grey font.

<sup>4</sup>Proteins are indicated by gene name for clarity.

**Supplementary Table 3 | Effect of reduced expression of selected +TIPs and other proteins on cortical microtubule targeting.**

| Gene name <sup>1</sup> | Protein name <sup>1</sup>                                    | Alias(es)        | Expression knockdown (%) <sup>2</sup> |      |      | Effect on MT localisation to cell periphery <sup>3</sup> |
|------------------------|--------------------------------------------------------------|------------------|---------------------------------------|------|------|----------------------------------------------------------|
|                        |                                                              |                  | HFF                                   | K562 | U2OS |                                                          |
| ARHGEF2                | Rho/rac guanine nucleotide exchange factor 2                 | GEF-H1           | 0                                     | 70   | 0    | -                                                        |
| CKAP5                  | Cytoskeleton-associated protein 5                            | Ch-TOG, XMAP215  | 70                                    | 75   | n.d. | -*                                                       |
| MACF1                  | Microtubule-actin cross-linking factor 1                     | ABP620, ACF7     | 80                                    | 0    | n.d. | -                                                        |
| MAPRE1                 | Microtubule-associated protein RP/EB family member 1         | EB1              | 90                                    | n.d. | n.d. | -                                                        |
| CDK9                   | Cyclin-dependent kinase 9                                    | CDC2L4, TAK      | 40                                    | n.d. | n.d. | -                                                        |
| FLNA                   | Filamin-A                                                    | ABP-280          | 0                                     | n.d. | 90   | -                                                        |
| GNB2L1                 | Guanine nucleotide-binding protein subunit beta-2-like 1     | HLC-7, RACK1     | 50                                    | n.d. | 50   | -*                                                       |
| GRB2                   | Growth factor receptor-bound protein 2                       | ASH              | 70                                    | n.d. | n.d. | -                                                        |
| LGALS1                 | Galectin-1                                                   | Galaptin, HLBP14 | 90                                    | n.d. | n.d. | -                                                        |
| MPG                    | DNA-3-methyladenine glycosylase                              | ADPG             | 85                                    | n.d. | n.d. | -                                                        |
| PLEC                   | Plectin                                                      | HD1              | 80                                    | n.d. | n.d. | +                                                        |
| SNRPB                  | Small nuclear ribonucleoprotein-associated proteins B and B' | Sm-B/B'          | 70                                    | n.d. | n.d. | -*                                                       |
| EZR                    | Ezrin                                                        | Cytovillin, VIL2 | 85                                    | n.d. | n.d. | -                                                        |
| ILK                    | Integrin-linked protein kinase                               | -                | n.d.                                  | n.d. | 90   | ++                                                       |
| IQGAP1                 | Ras GTPase-activating-like protein IQGAP1                    | p195             | 40                                    | n.d. | 90   | -                                                        |
| PHLDB2                 | Pleckstrin homology-like domain family B member 2            | LL5β             | 0                                     | n.d. | 70   | -                                                        |
| RCC2                   | Regulator of chromosome condensation 2                       | TD-60            | 90                                    | n.d. | 90   | +                                                        |

<sup>1</sup>Quantitative MS data for all proteins identified in the active integrin data set were mapped onto a merged, multi-source interactome database to generate an active integrin interactome (see methods for details). From the identified proteins reported to interact directly with or indirectly within three interactions of β1 integrin (the three-hop interaction network), proximity subnetworks seeded with β1 integrin or +TIPs were generated *in silico*. Proteins situated at the intersections of β1 integrin and +TIPs one- or two-hop subnetworks were identified as candidates that may functionally link active integrin and +TIPs. Expression of selected +TIPs (red bar), candidate connecting proteins from interaction network analysis (blue bar) and other potential connecting or active integrin-enriched proteins (green bar) was depleted by siRNA in a range of cell types. Knockdown of ILK expression has previously been shown to affect microtubule localisation at the cell periphery<sup>5</sup>.

<sup>2</sup>Experiments were performed in HFF, K562 and U2OS cells. 0, expression knockdown not effective; n.d., not done.

<sup>3</sup>Forty-eight to seventy-two hours after siRNA transfection, cells were spread on FN for 1 h, fixed and stained for α-tubulin to assess the effect of expression knockdown on microtubule targeting to the cell cortex. ++, substantial effect (microtubules did not reach the cell periphery in most cells); +, slight effect (microtubules did not reach the cell periphery in some cells); -, no effect (microtubules did reach the cell periphery); \*, expression knockdown produced off-target effects (such as reduced cell spreading or cell viability).



Supplementary Table 4 | Statistics source data.

(a) Statistics source data for Figure 4b.

| Cell repl. | MT density <sup>1,2</sup> |           |           | Statistic <sup>4</sup>                                                            | Comparison     |                 |              |
|------------|---------------------------|-----------|-----------|-----------------------------------------------------------------------------------|----------------|-----------------|--------------|
|            | FN                        | Stim.     | Inhib.    |                                                                                   | FN vs stim.    | Stim. vs inhib. | FN vs inhib. |
| 1          | 2.89 (9)                  | 5.13 (15) | 1.00 (10) | Mean difference                                                                   | -3.35          | 6.11            | 2.76         |
| 2          | 5.00 (11)                 | 6.36 (11) | 0.42 (12) | 95% CI of difference                                                              | -4.40 to -2.30 | 5.03 to 7.20    | 1.65 to 3.88 |
| 3          | 2.67 (6)                  | 7.71 (14) | 0.40 (15) | Corrected P value                                                                 | < 0.0001       | < 0.0001        | < 0.0001     |
| 4          | 4.67 (3)                  | 6.79 (19) | 0.38 (29) | *One-way analysis of variance, Tukey's multiple comparisons test, $\alpha = 0.05$ |                |                 |              |
| 5          | 3.63 (8)                  | 5.85 (13) | 1.00 (24) |                                                                                   |                |                 |              |
| 6          | 2.62 (13)                 | 8.36 (11) | 0.69 (29) |                                                                                   |                |                 |              |
| 7          | 2.43 (21)                 | 5.40 (15) | 0.55 (44) |                                                                                   |                |                 |              |
| 8          | 2.85 (13)                 | 6.00 (9)  | 0.30 (30) |                                                                                   |                |                 |              |
| 9          | 3.44 (18)                 | 6.88 (8)  | -         |                                                                                   |                |                 |              |
| 10         | -                         | 8.56 (16) | -         |                                                                                   |                |                 |              |
| Mean       | 3.35                      | 6.70      | 0.59      |                                                                                   |                |                 |              |
| s.d.       | 0.93                      | 1.19      | 0.28      |                                                                                   |                |                 |              |
| n          | 9                         | 10        | 8         |                                                                                   |                |                 |              |

<sup>1</sup>Number of MTs per 5 × 2- $\mu$ m region at cell periphery

<sup>2</sup>Number of regions quantified per cell indicated in parentheses

<sup>3</sup>P value ( $H_0$ , NGD, non-Gaussian distribution)

<sup>4</sup>D'Agostino & Pearson omnibus normality test,  $\alpha = 0.05$

(b) Statistics source data for Figure 4c.

| Cell repl.             | MT density <sup>1,2</sup> , before NOC |           |           | MT density <sup>1,2</sup> , after washout |           |           | Statistic <sup>4</sup>                                                            | Comparison, before NOC |                 |              | Comparison, after washout |                 |              | Compar., FN<br>Before vs after | Compar., stim.<br>Before vs after | Compar., inhib.<br>Before vs after |
|------------------------|----------------------------------------|-----------|-----------|-------------------------------------------|-----------|-----------|-----------------------------------------------------------------------------------|------------------------|-----------------|--------------|---------------------------|-----------------|--------------|--------------------------------|-----------------------------------|------------------------------------|
|                        | FN                                     | Stim.     | Inhib.    | FN                                        | Stim.     | Inhib.    |                                                                                   | FN vs stim.            | Stim. vs inhib. | FN vs inhib. | FN vs stim.               | Stim. vs inhib. | FN vs inhib. |                                |                                   |                                    |
| 1                      | 3.00 (36)                              | 3.05 (20) | 0.58 (19) | 2.48 (31)                                 | 2.62 (21) | 0.10 (20) | Mean difference                                                                   | 0.35                   | 2.42            | 2.77         | 0.48                      | 2.20            | 2.68         | 0.60                           | 0.73                              | 0.51                               |
| 2                      | 3.50 (32)                              | 2.41 (27) | 0.43 (23) | 2.53 (36)                                 | 1.60 (20) | 0.00 (20) | 95% CI of difference                                                              | -0.58 to 1.27          | 1.56 to 3.29    | 1.91 to 3.64 | -0.45 to 1.40             | 1.33 to 3.06    | 1.81 to 3.54 | -0.32 to 1.53                  | -0.19 to 1.66                     | -0.30 to 1.31                      |
| 3                      | 3.47 (34)                              | 3.47 (19) | 0.61 (23) | 3.16 (32)                                 | 2.52 (31) | 0.09 (34) | Corrected P value                                                                 | 0.8200                 | < 0.0001        | < 0.0001     | 0.5600                    | < 0.0001        | < 0.0001     | 0.3300                         | 0.1600                            | 0.3500                             |
| 4                      | -                                      | -         | 0.59 (34) | -                                         | -         | 0.00 (21) | *Two-way analysis of variance, Tukey's multiple comparisons test, $\alpha = 0.05$ |                        |                 |              |                           |                 |              |                                |                                   |                                    |
| Mean                   | 3.32                                   | 2.98      | 0.55      | 2.72                                      | 2.25      | 0.05      |                                                                                   |                        |                 |              |                           |                 |              |                                |                                   |                                    |
| s.d.                   | 0.28                                   | 0.54      | 0.07      | 0.38                                      | 0.56      | 0.05      |                                                                                   |                        |                 |              |                           |                 |              |                                |                                   |                                    |
| n                      | 3                                      | 3         | 4         | 3                                         | 3         | 4         |                                                                                   |                        |                 |              |                           |                 |              |                                |                                   |                                    |
| P (NGD) <sup>4,5</sup> | ND                                     | ND        | ND        | ND                                        | ND        | ND        |                                                                                   |                        |                 |              |                           |                 |              |                                |                                   |                                    |

<sup>1</sup>Number of MTs per 5 × 2- $\mu$ m region at cell periphery

<sup>2</sup>Number of regions quantified per cell indicated in parentheses

<sup>3</sup>P value ( $H_0$ , NGD, non-Gaussian distribution)

<sup>4</sup>D'Agostino & Pearson omnibus normality test,  $\alpha = 0.05$

<sup>5</sup>ND, not determined (too few values to compute normality)

(c) Statistics source data for Figure 4d.

| Cell repl.             | MT density <sup>1,2</sup> , DMSO |           | MT density <sup>1,2</sup> , cytochalasin |           | Statistic <sup>4</sup>                                                            | Compar., DMSO   | Compar., cyto.  | Compar., stim. | Compar., inhib. |
|------------------------|----------------------------------|-----------|------------------------------------------|-----------|-----------------------------------------------------------------------------------|-----------------|-----------------|----------------|-----------------|
|                        | Stim.                            | Inhib.    | Stim.                                    | Inhib.    |                                                                                   | Stim. vs inhib. | Stim. vs inhib. | DMSO vs cyto.  | DMSO vs cyto.   |
| 1                      | 3.72 (18)                        | 0.08 (38) | 3.43 (21)                                | 0.76 (25) | Mean difference                                                                   | 3.38            | 2.55            | -0.57          | -1.40           |
| 2                      | 3.82 (17)                        | 0.03 (31) | 4.77 (30)                                | 1.63 (24) | 95% CI of difference                                                              | 2.57 to 4.19    | 1.80 to 3.30    | -1.38 to 0.24  | -2.15 to -0.65  |
| 3                      | 4.39 (18)                        | 0.42 (43) | 4.64 (25)                                | 2.15 (27) | Corrected P value                                                                 | < 0.0001        | < 0.0001        | 0.2246         | 0.0003          |
| 4                      | 3.18 (17)                        | 0.28 (32) | 4.15 (26)                                | 1.84 (25) | *Two-way analysis of variance, Tukey's multiple comparisons test, $\alpha = 0.05$ |                 |                 |                |                 |
| 5                      | 2.95 (21)                        | 0.36 (39) | 3.94 (16)                                | 1.82 (17) |                                                                                   |                 |                 |                |                 |
| 6                      | -                                | -         | -                                        | 1.63 (24) |                                                                                   |                 |                 |                |                 |
| 7                      | -                                | -         | -                                        | 1.61 (23) |                                                                                   |                 |                 |                |                 |
| Mean                   | 3.61                             | 0.23      | 4.19                                     | 1.63      |                                                                                   |                 |                 |                |                 |
| s.d.                   | 0.57                             | 0.17      | 0.54                                     | 0.43      |                                                                                   |                 |                 |                |                 |
| n                      | 5                                | 5         | 5                                        | 7         |                                                                                   |                 |                 |                |                 |
| P (NGD) <sup>4,5</sup> | ND                               | ND        | ND                                       | ND        |                                                                                   |                 |                 |                |                 |

<sup>1</sup>Number of MTs per 5 × 2- $\mu$ m region at cell periphery

<sup>2</sup>Number of regions quantified per cell indicated in parentheses

<sup>3</sup>P value ( $H_0$ , NGD, non-Gaussian distribution)

<sup>4</sup>D'Agostino & Pearson omnibus normality test,  $\alpha = 0.05$

<sup>5</sup>ND, not determined (too few values to compute normality)

Supplementary Table 4 (cont.) | Statistics source data.

(d) Statistics source data for Figure 5a.

| Patch                  | MT density <sup>1</sup> |          |          | Statistic <sup>4</sup>                                                  | Comparison        |                   |                    |
|------------------------|-------------------------|----------|----------|-------------------------------------------------------------------------|-------------------|-------------------|--------------------|
|                        | FN                      | Stim.    | Inhib.   |                                                                         | FN vs stim.       | Stim. vs inhib.   | FN vs inhib.       |
| 1                      | 32.66                   | 166.66   | 23.89    | Mean rank difference<br>Corrected P value                               | -7.02<br>> 0.9999 | 93.30<br>< 0.0001 | 100.30<br>< 0.0001 |
| 2                      | 7.23                    | 318.47   | 15.82    |                                                                         |                   |                   |                    |
| 3                      | 147.01                  | 237.14   | 23.30    | *Kruskal-Wallis test, Dunn's multiple comparisons test, $\alpha = 0.05$ |                   |                   |                    |
| 4                      | 22.43                   | 137.33   | 86.57    |                                                                         |                   |                   |                    |
| 5                      | 27.56                   | 79.88    | 77.48    |                                                                         |                   |                   |                    |
| 6                      | 5.05                    | 30.53    | 21.73    |                                                                         |                   |                   |                    |
| 7                      | 7.79                    | 36.40    | 36.92    |                                                                         |                   |                   |                    |
| 8                      | 69.07                   | 26.34    | 70.63    |                                                                         |                   |                   |                    |
| 9                      | 5.35                    | 28.51    | 19.49    |                                                                         |                   |                   |                    |
| 10                     | 13.28                   | 21.63    | 28.95    |                                                                         |                   |                   |                    |
| 11                     | 324.87                  | 43.72    | 17.19    |                                                                         |                   |                   |                    |
| 12                     | 95.64                   | 30.33    | 16.37    |                                                                         |                   |                   |                    |
| 13                     | 331.86                  | 156.48   | 33.45    |                                                                         |                   |                   |                    |
| 14                     | 235.51                  | 193.51   | 24.20    |                                                                         |                   |                   |                    |
| 15                     | 50.68                   | 27.75    | 36.84    |                                                                         |                   |                   |                    |
| 16                     | 84.05                   | 27.43    | 56.43    |                                                                         |                   |                   |                    |
| 17                     | 92.80                   | 120.40   | 11.78    |                                                                         |                   |                   |                    |
| 18                     | 77.19                   | 228.66   | 11.40    |                                                                         |                   |                   |                    |
| 19                     | 10.35                   | 91.00    | 20.83    |                                                                         |                   |                   |                    |
| 20                     | 92.58                   | 19.29    | 37.34    |                                                                         |                   |                   |                    |
| 21                     | 418.90                  | 46.37    | 57.24    |                                                                         |                   |                   |                    |
| 22                     | 608.84                  | 46.37    | 44.03    |                                                                         |                   |                   |                    |
| 23                     | 248.34                  | 42.42    | 46.73    |                                                                         |                   |                   |                    |
| 24                     | 475.57                  | 112.11   | 23.03    |                                                                         |                   |                   |                    |
| 25                     | 325.48                  | 53.06    | 32.70    |                                                                         |                   |                   |                    |
| 26                     | 31.77                   | 453.29   | 89.83    |                                                                         |                   |                   |                    |
| 27                     | 73.18                   | 62.08    | 78.72    |                                                                         |                   |                   |                    |
| 28                     | 626.04                  | 170.06   | 53.77    |                                                                         |                   |                   |                    |
| 29                     | 42.21                   | 311.45   | 79.12    |                                                                         |                   |                   |                    |
| 30                     | 189.94                  | 186.80   | 39.89    |                                                                         |                   |                   |                    |
| 31                     | 180.98                  | 187.55   | 37.34    |                                                                         |                   |                   |                    |
| 32                     | 249.38                  | 91.16    | 57.24    |                                                                         |                   |                   |                    |
| 33                     | 234.12                  | 114.34   | 44.03    |                                                                         |                   |                   |                    |
| 34                     | 369.53                  | 201.33   | 46.73    |                                                                         |                   |                   |                    |
| 35                     | 248.48                  | 43.51    | 23.03    |                                                                         |                   |                   |                    |
| 36                     | 307.22                  | 107.45   | 32.70    |                                                                         |                   |                   |                    |
| 37                     | 124.81                  | 83.84    | 89.83    |                                                                         |                   |                   |                    |
| 38                     | 193.56                  | 135.02   | 78.72    |                                                                         |                   |                   |                    |
| 39                     | 56.61                   | 227.37   | 53.77    |                                                                         |                   |                   |                    |
| 40                     | 232.97                  | 93.96    | 79.12    |                                                                         |                   |                   |                    |
| 41                     | 202.79                  | 80.96    | 39.89    |                                                                         |                   |                   |                    |
| 42                     | 107.07                  | 233.50   | 21.48    |                                                                         |                   |                   |                    |
| 43                     | 26.22                   | 48.90    | 17.71    |                                                                         |                   |                   |                    |
| 44                     | 217.85                  | 64.64    | 18.13    |                                                                         |                   |                   |                    |
| 45                     | 104.96                  | 388.06   | 18.07    |                                                                         |                   |                   |                    |
| 46                     | 188.83                  | 68.32    | 28.46    |                                                                         |                   |                   |                    |
| 47                     | 36.57                   | 95.15    | 18.11    |                                                                         |                   |                   |                    |
| 48                     | 294.35                  | 288.45   | 16.06    |                                                                         |                   |                   |                    |
| 49                     | 52.79                   | 45.23    | 23.87    |                                                                         |                   |                   |                    |
| 50                     | 8.04                    | 123.81   | 40.47    |                                                                         |                   |                   |                    |
| 51                     | 42.48                   | 223.57   | 46.90    |                                                                         |                   |                   |                    |
| 52                     | 50.67                   | 84.88    | 71.68    |                                                                         |                   |                   |                    |
| 53                     | 310.96                  | 149.25   | 122.04   |                                                                         |                   |                   |                    |
| 54                     | 287.07                  | 117.84   | 67.70    |                                                                         |                   |                   |                    |
| 55                     | 319.83                  | 369.57   | 21.79    |                                                                         |                   |                   |                    |
| 56                     | 22.07                   | 102.20   | 45.98    |                                                                         |                   |                   |                    |
| 57                     | 171.15                  | 107.95   | 11.43    |                                                                         |                   |                   |                    |
| 58                     | 92.55                   | 129.33   | 22.82    |                                                                         |                   |                   |                    |
| 59                     | 102.58                  | 145.51   | 10.47    |                                                                         |                   |                   |                    |
| 60                     | 20.35                   | 66.14    | 56.35    |                                                                         |                   |                   |                    |
| 61                     | 34.70                   | 28.09    | 109.12   |                                                                         |                   |                   |                    |
| 62                     | 76.86                   | 174.38   | 51.50    |                                                                         |                   |                   |                    |
| 63                     | 19.91                   | 33.41    | 271.78   |                                                                         |                   |                   |                    |
| 64                     | 454.45                  | 127.50   | 37.38    |                                                                         |                   |                   |                    |
| 65                     | 33.74                   | 258.43   | 12.87    |                                                                         |                   |                   |                    |
| 66                     | 8.62                    | 31.14    | 116.95   |                                                                         |                   |                   |                    |
| 67                     | 200.65                  | 218.82   | 33.45    |                                                                         |                   |                   |                    |
| 68                     | 20.09                   | 73.61    | 7.91     |                                                                         |                   |                   |                    |
| 69                     | 66.40                   | 128.65   | 72.48    |                                                                         |                   |                   |                    |
| 70                     | 948.28                  | 146.60   | 19.30    |                                                                         |                   |                   |                    |
| 71                     | 5.31                    | 20.28    | 78.78    |                                                                         |                   |                   |                    |
| 72                     | 356.60                  | 121.65   | 21.01    |                                                                         |                   |                   |                    |
| 73                     | 667.07                  | 105.61   | 36.43    |                                                                         |                   |                   |                    |
| 74                     | 92.29                   | 61.74    | 17.42    |                                                                         |                   |                   |                    |
| 75                     | 206.55                  | 69.90    | 82.59    |                                                                         |                   |                   |                    |
| 76                     | 90.54                   | 212.28   | 36.87    |                                                                         |                   |                   |                    |
| 77                     | 158.27                  | 200.05   | 9.69     |                                                                         |                   |                   |                    |
| 78                     | 22.57                   | 37.79    | 8.93     |                                                                         |                   |                   |                    |
| 79                     | 344.39                  | 77.86    | 10.14    |                                                                         |                   |                   |                    |
| 80                     | 31.62                   | 718.35   | 10.02    |                                                                         |                   |                   |                    |
| 81                     | 196.43                  | 132.53   | 54.88    |                                                                         |                   |                   |                    |
| 82                     | 12.87                   | 90.12    | 24.33    |                                                                         |                   |                   |                    |
| 83                     | 182.36                  | 261.42   | 6.81     |                                                                         |                   |                   |                    |
| 84                     | 109.94                  | 93.81    | 33.40    |                                                                         |                   |                   |                    |
| 85                     | 101.76                  | 88.64    | 20.83    |                                                                         |                   |                   |                    |
| 86                     | 32.79                   | 28.23    | 8.15     |                                                                         |                   |                   |                    |
| 87                     | 81.47                   | 83.62    | 21.48    |                                                                         |                   |                   |                    |
| 88                     | 28.41                   | 60.02    | 10.62    |                                                                         |                   |                   |                    |
| 89                     | 60.23                   | 104.70   | 22.88    |                                                                         |                   |                   |                    |
| 90                     | 150.57                  | 222.95   | 23.78    |                                                                         |                   |                   |                    |
| 91                     | 64.10                   | 208.08   | 57.63    |                                                                         |                   |                   |                    |
| 92                     | 161.77                  | 161.19   | 14.59    |                                                                         |                   |                   |                    |
| 93                     | 342.23                  | 80.51    | 34.93    |                                                                         |                   |                   |                    |
| 94                     | 85.40                   | 82.73    | 18.90    |                                                                         |                   |                   |                    |
| 95                     | 10.16                   | 196.73   | 20.24    |                                                                         |                   |                   |                    |
| 96                     | -                       | 64.15    | 15.28    |                                                                         |                   |                   |                    |
| 97                     | -                       | 56.49    | 25.62    |                                                                         |                   |                   |                    |
| 98                     | -                       | 348.51   | -        |                                                                         |                   |                   |                    |
| 99                     | -                       | 272.87   | -        |                                                                         |                   |                   |                    |
| 100                    | -                       | 223.66   | -        |                                                                         |                   |                   |                    |
| 101                    | -                       | 24.10    | -        |                                                                         |                   |                   |                    |
| 102                    | -                       | 53.42    | -        |                                                                         |                   |                   |                    |
| 103                    | -                       | 178.54   | -        |                                                                         |                   |                   |                    |
| 104                    | -                       | 32.12    | -        |                                                                         |                   |                   |                    |
| 105                    | -                       | 118.69   | -        |                                                                         |                   |                   |                    |
| 106                    | -                       | 82.27    | -        |                                                                         |                   |                   |                    |
| 107                    | -                       | 96.28    | -        |                                                                         |                   |                   |                    |
| 108                    | -                       | 45.88    | -        |                                                                         |                   |                   |                    |
| 109                    | -                       | 40.39    | -        |                                                                         |                   |                   |                    |
| 110                    | -                       | 182.66   | -        |                                                                         |                   |                   |                    |
| 111                    | -                       | 41.75    | -        |                                                                         |                   |                   |                    |
| 112                    | -                       | 196.50   | -        |                                                                         |                   |                   |                    |
| 113                    | -                       | 81.41    | -        |                                                                         |                   |                   |                    |
| 114                    | -                       | 38.13    | -        |                                                                         |                   |                   |                    |
| 115                    | -                       | 109.67   | -        |                                                                         |                   |                   |                    |
| 116                    | -                       | 76.84    | -        |                                                                         |                   |                   |                    |
| 117                    | -                       | 96.75    | -        |                                                                         |                   |                   |                    |
| 118                    | -                       | 36.08    | -        |                                                                         |                   |                   |                    |
| 119                    | -                       | 80.36    | -        |                                                                         |                   |                   |                    |
| 120                    | -                       | 93.40    | -        |                                                                         |                   |                   |                    |
| 121                    | -                       | 44.11    | -        |                                                                         |                   |                   |                    |
| 122                    | -                       | 37.06    | -        |                                                                         |                   |                   |                    |
| 123                    | -                       | 51.94    | -        |                                                                         |                   |                   |                    |
| 124                    | -                       | 47.17    | -        |                                                                         |                   |                   |                    |
| 125                    | -                       | 57.51    | -        |                                                                         |                   |                   |                    |
| Mean                   | 158.84                  | 123.00   | 40.48    |                                                                         |                   |                   |                    |
| s.d.                   | 168.48                  | 102.25   | 35.50    |                                                                         |                   |                   |                    |
| n                      | 95                      | 125      | 97       |                                                                         |                   |                   |                    |
| P (NGD) <sup>1,2</sup> | < 0.0001                | < 0.0001 | < 0.0001 |                                                                         |                   |                   |                    |

<sup>1</sup>Tubulin fluorescence intensity per patch at cell periphery

<sup>2</sup>P value ( $H_0$ : NGD, non-Gaussian distribution)

<sup>4</sup>D'Agostino & Pearson omnibus normality test,  $\alpha = 0.05$

(e) Statistics source data for Figure 5c.

| Cell repl.             | MT density <sup>1,2</sup> |           |           |                             | Statistic <sup>4</sup>                                       | Comparison                              |                              |
|------------------------|---------------------------|-----------|-----------|-----------------------------|--------------------------------------------------------------|-----------------------------------------|------------------------------|
|                        | FN                        | Stim.     | Inhib.    | Inhib. + stim. <sup>3</sup> |                                                              | Inhib. vs inhib. + stim. <sup>3</sup>   | Inhib. vs stim. <sup>3</sup> |
| 1                      | 3.58 (40)                 | 2.31 (35) | 0.11 (36) | 2.64 (56)                   | Mean difference<br>95% CI of difference<br>Corrected P value | 2.38 ± 0.24<br>1.85 to 2.90<br>< 0.0001 |                              |
| 2                      | 3.50 (36)                 | 3.64 (14) | 0.32 (34) | 2.03 (33)                   |                                                              |                                         |                              |
| 3                      | 4.61 (31)                 | 2.88 (40) | 0.38 (32) | 3.64 (47)                   | *Two-tailed unpaired t test, Welch's correction              |                                         |                              |
| 4                      | 4.00 (55)                 | 2.00 (24) | 0.22 (32) | 2.36 (45)                   |                                                              |                                         |                              |
| 5                      | 5.56 (18)                 | 2.90 (21) | 0.56 (36) | 1.92 (39)                   |                                                              |                                         |                              |
| 6                      | 5.06 (17)                 | 3.03 (33) | 0.85 (33) | 2.95 (56)                   |                                                              |                                         |                              |
| 7                      | 3.04 (23)                 | 2.63 (19) | 0.10 (39) | 3.29 (35)                   |                                                              |                                         |                              |
| 8                      | 5.63 (8)                  | 2.31 (48) | 1.08 (36) | 3.00 (33)                   |                                                              |                                         |                              |
| 9                      | 4.08 (13)                 | 4.79 (33) | 0.24 (34) | 2.13 (45)                   |                                                              |                                         |                              |
| 10                     | -                         | 2.96 (26) | 0.39 (31) | 4.00 (37)                   |                                                              |                                         |                              |
| 11                     | -                         | 1.88 (25) | 0.35 (34) | -                           |                                                              |                                         |                              |
| 12                     | -                         | 3.75 (50) | -         | -                           |                                                              |                                         |                              |
| Mean                   | 4.34                      | 2.92      | 0.42      | 2.80                        |                                                              |                                         |                              |
| s.d.                   | 0.93                      | 0.82      | 0.30      | 0.70                        |                                                              |                                         |                              |
| n                      | 9                         | 12        | 11        | 10                          |                                                              |                                         |                              |
| P (NGD) <sup>1,2</sup> | 0.54                      | 0.18      | 0.09      | 0.66                        |                                                              |                                         |                              |

<sup>1</sup>Number of MTs per 5 × 2- $\mu$ m region at cell periphery

<sup>2</sup>Number of regions quantified per cell indicated in parentheses

<sup>3</sup>Inhibitory:stimulatory, 1:0:0:1

<sup>4</sup>P value ( $H_0$ : NGD, non-Gaussian distribution)

<sup>5</sup>D'Agostino & Pearson omnibus normality test,  $\alpha = 0.05$

## Supplementary References

1. Winograd-Katz, S. E., Fässler, R., Geiger, B. & Legate, K. R. The integrin adhesome: from genes and proteins to human disease. *Nat. Rev. Mol. Cell Biol.* **15**, 273–288 (2014).
2. Zaidel-Bar, R., Itzkovitz, S., Ma'ayan, A., Iyengar, R. & Geiger, B. Functional atlas of the integrin adhesome. *Nat. Cell Biol.* **9**, 858–867 (2007).
3. Ye, F., Lagarrigue, F. & Ginsberg, M. H. Talin and the modular nature of the integrin adhesome. *Cell* **156**, 1340–1340.e1 (2013).
4. Applegate, K. T. *et al.* plusTipTracker: Quantitative image analysis software for the measurement of microtubule dynamics. *J. Struct. Biol.* **176**, 168–184 (2011).
5. Wickström, S. A. *et al.* Integrin-linked kinase controls microtubule dynamics required for plasma membrane targeting of caveolae. *Dev. Cell* **19**, 574–588 (2010).
